# Supplementary material for: Rotator cuff-related shoulder pain: does the type of exercise influence the outcomes? Protocol of a randomised controlled trial
Source: PubMed Central journal article supplement — BMJ Open. 2020 Nov 5;10(11):e039976. doi: 10.1136/bmjopen-2020-039976 (PMC7646354; doi:10.1136/bmjopen-2020-039976), 2020-11-05

**Supplementary file 1: Shoulder muscles strengthening program.**

| <b>EXERCISES PROGRAM</b>                                                                                                                                                                                                                                                                                                                                                       |                                                                                     |                                                                                      |
|--------------------------------------------------------------------------------------------------------------------------------------------------------------------------------------------------------------------------------------------------------------------------------------------------------------------------------------------------------------------------------|-------------------------------------------------------------------------------------|--------------------------------------------------------------------------------------|
| <b>A) SHOULDER EXTERNAL ROTATION</b>                                                                                                                                                                                                                                                                                                                                           |                                                                                     |                                                                                      |
| <p><b>1. Shoulder external rotation at 0°</b></p> <ul style="list-style-type: none"> <li>• Hold a weight in your hand.</li> <li>• Lie on the opposite side of the hand holding the weight.</li> <li>• With the trunk upright, flex the elbow 90 degrees. Tighten the abs.</li> <li>• Lift the weight so that your hand is upward, keeping your elbow at 90 degrees.</li> </ul> |    |   |
| <p><b>2. Shoulder external rotation at 45°</b></p> <ul style="list-style-type: none"> <li>• Hold a weight in your hand.</li> <li>• With the trunk upright, flex the elbow 90 degrees. Tighten the abs.</li> <li>• Lift your arm to 90° of abduction while</li> </ul>                                                                                                           |  |  |

|                                                                                                                                                                                                                                                                                                                                                                                                           |                                                                                      |  |
|-----------------------------------------------------------------------------------------------------------------------------------------------------------------------------------------------------------------------------------------------------------------------------------------------------------------------------------------------------------------------------------------------------------|--------------------------------------------------------------------------------------|--|
| <p>keeping your elbow flexed at 90°.</p> <ul style="list-style-type: none"> <li>• Lift the weight in order to bring your hand upwards and backwards while keeping your elbow flexed at 90° and your arm abducted at 45°.</li> </ul>                                                                                                                                                                       |                                                                                      |  |
| <b>B) SHOULDER INTERNAL ROTATION</b>                                                                                                                                                                                                                                                                                                                                                                      |                                                                                      |  |
| <p><b>1. Shoulder internal rotation at 0°</b></p> <ul style="list-style-type: none"> <li>• Tie an elastic band level to your hips. Turn aside.</li> <li>• With your trunk straight, flex the elbow 90 degrees. Tighten the abs.</li> <li>• Pull the elastic to bring the hand from the outside to the inside, make sure that the elbow does not take off from the body. Keep the elbow at 90°.</li> </ul> |   |  |
| <b>C) ARM ELEVATION (SCAPTION)</b>                                                                                                                                                                                                                                                                                                                                                                        |                                                                                      |  |
| <p><b>1. Scaption with weight</b></p> <ul style="list-style-type: none"> <li>• Use a weight to make the scaption movement.</li> <li>• Raise your arm by keeping your elbow extended in a 45° motion plane.</li> <li>• Do not lift the shoulder up or lean the trunk to the opposite side.</li> </ul>                                                                                                      |  |  |

| <b>D) SHOULDER PROTRACTION</b>                                                                                                                                                                                                                                                                                                                         |                                                                                      |
|--------------------------------------------------------------------------------------------------------------------------------------------------------------------------------------------------------------------------------------------------------------------------------------------------------------------------------------------------------|--------------------------------------------------------------------------------------|
| <p><b>1. Protraction with weight</b></p> <ul style="list-style-type: none"><li>• Lie on your back with your knees bent and your back in a neutral position. Contract your abs.</li><li>• Raise your arm up to reach 90°. When your arm is upright, push your hand toward the ceiling keeping your back flat, without lifting your shoulders.</li></ul> | 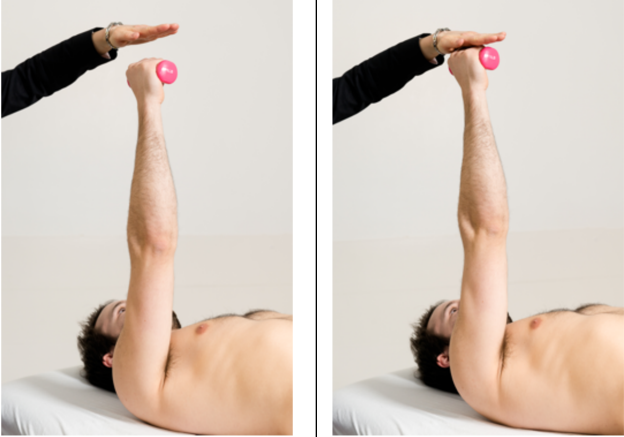   |
| <b>E) SHOULDER EXTENSION</b>                                                                                                                                                                                                                                                                                                                           |                                                                                      |
| <p><b>1. Shoulder extension with an elastic band</b></p> <ul style="list-style-type: none"><li>• With both hands, grasp the ends of a rubber band attached at shoulder height.</li><li>• Keep your back straight and your shoulders slightly back. Tighten the abdominals, tuck in the chin.</li></ul>                                                 |  |

|                                                                                                                                                                                                                                                                                                                                                                         |                                                                                     |                                                                                       |
|-------------------------------------------------------------------------------------------------------------------------------------------------------------------------------------------------------------------------------------------------------------------------------------------------------------------------------------------------------------------------|-------------------------------------------------------------------------------------|---------------------------------------------------------------------------------------|
| <ul style="list-style-type: none"><li>• With arms outstretched, slowly pull backwards so that your hands are shifted to the outside of your hip. Keep your back straight and your shoulders slightly backwards throughout the exercise.</li></ul>                                                                                                                       |                                                                                     |                                                                                       |
| <b>F) HORIZONTAL ABDUCTION</b>                                                                                                                                                                                                                                                                                                                                          |                                                                                     |                                                                                       |
| <b>1. Horizontal abduction with weight</b> <ul style="list-style-type: none"><li>• Lying prone, with your elbow flexed 90° and a weight in each hand.</li><li>• Lift your arms up 1 or 2 cm without lifting your shoulders from the table.</li><li>• Extend your elbows.</li><li>• Flex back your elbows to 90° and lower your arms in the starting position.</li></ul> |  |  |

**G) ELEVATION****1. Elevation with weight**

- With arms raised about 30 ° to the side, bring both shoulders slightly back and towards the eyes.
- Tighten the abdominals, tuck in the chin.

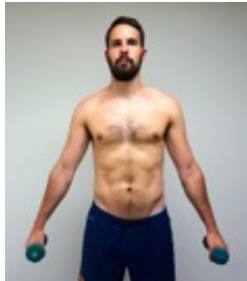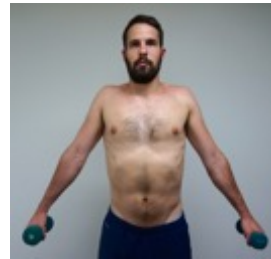

Supplement: bmjopen-2020-039976supp001.pdf [file bmjopen-2020-039976supp001.pdf]
