# Supplementary material for: Rotator cuff-related shoulder pain: does the type of exercise influence the outcomes? Protocol of a randomised controlled trial
Source: PubMed Central journal article supplement — BMJ Open. 2020 Nov 5;10(11):e039976. doi: 10.1136/bmjopen-2020-039976 (PMC7646354; doi:10.1136/bmjopen-2020-039976), 2020-11-05
Supplement: bmjopen-2020-039976.draft_revisions.pdf [file bmjopen-2020-039976.draft_revisions.pdf]

# BMJ Open

BMJ Open is committed to open peer review. As part of this commitment we make the peer review history of every article we publish publicly available.

When an article is published we post the peer reviewers' comments and the authors' responses online. We also post the versions of the paper that were used during peer review. These are the versions that the peer review comments apply to.

The versions of the paper that follow are the versions that were submitted during the peer review process. They are not the versions of record or the final published versions. They should not be cited or distributed as the published version of this manuscript.

BMJ Open is an open access journal and the full, final, typeset and author-corrected version of record of the manuscript is available on our site with no access controls, subscription charges or pay-per-view fees (<http://bmjopen.bmj.com>).

If you have any questions on BMJ Open's open peer review process please email [info.bmjopen@bmj.com](mailto:info.bmjopen@bmj.com)

# BMJ Open

## Rotator Cuff Related Shoulder Pain: Does The Type of Exercise Influence The Outcomes? – Protocol of a Randomized Controlled Trial

|                               |                                                                                                                                                                                                                                                                                                                                                                                                                                                                                                                                                      |
|-------------------------------|------------------------------------------------------------------------------------------------------------------------------------------------------------------------------------------------------------------------------------------------------------------------------------------------------------------------------------------------------------------------------------------------------------------------------------------------------------------------------------------------------------------------------------------------------|
| Journal:                      | <i>BMJ Open</i>                                                                                                                                                                                                                                                                                                                                                                                                                                                                                                                                      |
| Manuscript ID                 | bmjopen-2020-039976                                                                                                                                                                                                                                                                                                                                                                                                                                                                                                                                  |
| Article Type:                 | Protocol                                                                                                                                                                                                                                                                                                                                                                                                                                                                                                                                             |
| Date Submitted by the Author: | 04-May-2020                                                                                                                                                                                                                                                                                                                                                                                                                                                                                                                                          |
| Complete List of Authors:     | Dubé, Marc-Olivier; Université Laval Faculté de médecine, Rehabilitation; Center for Interdisciplinary Research in Rehabilitation and Social Integration<br>Desmeules, François; Université de Montréal Faculté de Médecine, Rehabilitation; Maisonneuve-Rosemont Hospital Research Centre<br>Lewis, Jeremy; University of Hertfordshire; Central London Community Healthcare NHS Trust<br>Roy, Jean-Sébastien; Université Laval Faculté de médecine, Rehabilitation; Center for Interdisciplinary Research in Rehabilitation and Social Integration |
| Keywords:                     | Elbow & shoulder < ORTHOPAEDIC & TRAUMA SURGERY, Musculoskeletal disorders < ORTHOPAEDIC & TRAUMA SURGERY, Shoulder < ORTHOPAEDIC & TRAUMA SURGERY, REHABILITATION MEDICINE, SPORTS MEDICINE                                                                                                                                                                                                                                                                                                                                                         |
|                               |                                                                                                                                                                                                                                                                                                                                                                                                                                                                                                                                                      |

SCHOLARONE™  
Manuscripts

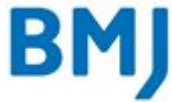

I, the Submitting Author has the right to grant and does grant on behalf of all authors of the Work (as defined in the below author licence), an exclusive licence and/or a non-exclusive licence for contributions from authors who are: i) UK Crown employees; ii) where BMJ has agreed a CC-BY licence shall apply, and/or iii) in accordance with the terms applicable for US Federal Government officers or employees acting as part of their official duties; on a worldwide, perpetual, irrevocable, royalty-free basis to BMJ Publishing Group Ltd ("BMJ") its licensees and where the relevant Journal is co-owned by BMJ to the co-owners of the Journal, to publish the Work in this journal and any other BMJ products and to exploit all rights, as set out in our [licence](#).

The Submitting Author accepts and understands that any supply made under these terms is made by BMJ to the Submitting Author unless you are acting as an employee on behalf of your employer or a postgraduate student of an affiliated institution which is paying any applicable article publishing charge ("APC") for Open Access articles. Where the Submitting Author wishes to make the Work available on an Open Access basis (and intends to pay the relevant APC), the terms of reuse of such Open Access shall be governed by a Creative Commons licence – details of these licences and which [Creative Commons](#) licence will apply to this Work are set out in our licence referred to above.

Other than as permitted in any relevant BMJ Author's Self Archiving Policies, I confirm this Work has not been accepted for publication elsewhere, is not being considered for publication elsewhere and does not duplicate material already published. I confirm all authors consent to publication of this Work and authorise the granting of this licence.

1  
2 1 **ROTATOR CUFF RELATED SHOULDER PAIN: DOES THE TYPE OF EXERCISE INFLUENCE THE**  
3 2 **OUTCOMES? – PROTOCOL OF A RANDOMIZED CONTROLLED TRIAL**

4  
5 3 **VERSION 6.3 (APRIL 30, 2020)**  
6 4

7  
8 5 Marc-Olivier Dubé, PT, PhD(c)<sup>1,2</sup>, François Desmeules, PT, PhD<sup>3,4</sup>, Jeremy Lewis, PT, PhD<sup>5,6,7</sup> Orcid:  
9 6 0000-0001-7870-9165, Jean-Sébastien Roy, PT, PhD<sup>1,2</sup>  
10  
11 7

12  
13 8 <sup>1</sup> Center for Interdisciplinary Research in Rehabilitation and Social Integration, Quebec City, Quebec,  
14 9 Canada G1M 2S8

15  
16 10 <sup>2</sup> Department of Rehabilitation, Faculty of Medicine, Université Laval, Quebec City, Quebec, Canada  
17 11 G1R 1P5

18  
19 12 <sup>3</sup> Orthopaedic Clinical Research Unit, Maisonneuve-Rosemont Hospital Research Center, University of  
20 13 Montreal Affiliated Research Center, Montreal, Canada

21  
22 14 <sup>4</sup> Faculty of Medicine, School of Rehabilitation, University of Montreal, Montreal, Canada

23  
24 15 <sup>5</sup> School of Health and Social Work, University of Hertfordshire, Hatfield AL10 9AB, Hertfordshire,  
25 16 United Kingdom.

26  
27 17 <sup>6</sup> Therapy Department, Central London Community Healthcare National Health Service Trust, London,  
28 18 United Kingdom.

29  
30 19 <sup>7</sup> Department of Physical Therapy & Rehabilitation Science, College of Health Sciences, Qatar  
31 20 University, Doha, Qatar.  
32  
33 21

34 22 **Corresponding Author**  
35  
36 23

37  
38 24 Jean-Sébastien Roy, PT, PhD  
39 25 Université Laval

40  
41 26  
42 27 Centre for Interdisciplinary Research in Rehabilitation and Social Integration  
43 28 525, Boulevard Wilfrid-Hamel, office H-1710  
44 29 Quebec (Quebec) G1M 2S8  
45 30 418 529-9141 # 6005  
46 31

47  
48 32 Email: [jean-sebastien.roy@fmed.ulaval.ca](mailto:jean-sebastien.roy@fmed.ulaval.ca)

49  
50 33 Keywords: shoulder, rotator cuff, rehabilitation, exercises, shoulder pain

51 34 Word count: 3427  
52  
53  
54  
55  
56  
57  
58  
59  
60

## ABSTRACT

**INTRODUCTION:** Lifetime prevalence of shoulder pain is 70%, and approximately 50% of people with shoulder pain will experience pain for more than a year. Rotator cuff related shoulder pain (RCRSP) is the most common shoulder condition and the main non-surgical intervention is exercise therapy. Approximately for 30% of people with RCRSP, this approach does not lead to a significant reduction in symptoms. This may be due to an inappropriate dosage or choice of exercises. The aim of this investigation is to compare the short, mid and long-term effects, in terms of symptoms, functional limitations, kinesiophobia and pain catastrophizing, of 3 different shoulder rehabilitation approaches (education, strengthening, motor control) in adults with RCRSP.

**METHODS AND ANALYSIS:** In this single-blind (assessor), parallel group randomized clinical trial, 123 adults presenting with RCRSP will take part in a 12-week rehabilitation program. They will be randomly assigned to 1 of 3 groups (education only, strengthening approach or motor control focused approach). *QuickDASH*, the primary outcome, Western Ontario Rotator Cuff index and Brief Pain Inventory will evaluate symptoms and functional limitations, while Tampa Scale of Kinesiophobia and Pain Catastrophizing Scale will evaluate pain-related fear and catastrophizing at baseline and at 3, 6, 12 and 24 weeks. Ultrasonographic acromiohumeral distances and tendon thickness will be assessed at baseline and 12 weeks. Treatment effects will be assessed using a two-way repeated measures analysis of variance.

**ETHICS AND DISSEMINATION:** Ethics approval was obtained from the Ethics Committee of the Centre Integrated University Health and Social Services. Results will be disseminated through international publications in peer-reviewed journals, in addition to international conference presentations.

**TRIAL REGISTRATION NUMBER:** Protocol was registered at ClinicalTrials.gov (NCT03892603) on May 22, 2019.

## ARTICLE SUMMARY

### Strengths And Limitations of This Study

- This randomized controlled trial directly compares three of the most widely used interventions for RCRSP (education, strengthening and motor control exercises) to highlight the most efficient and guide shoulder rehabilitation.
- Effects on symptoms, kinesiophobia, catastrophisation, acromiohumeral distance and tendon thickness of different exercise programs as well as education will be analyzed.
- Methods to reduce the risk of bias will be implemented throughout the study, which includes a statistically justified sample size, blinding, randomization and adequate concealment of group allocation for the assessors.
- Patients will be blinded to the treatment provided to the other groups as it is not feasible to completely blind the participants and the treating therapist due to the nature of the allocated treatments.
- A true control group (wait-and-see approach) will not be included as it would be difficult to maintain a high retention and avoid co-interventions during the mid- and long-term follow-up.

## INTRODUCTION

Shoulder pain is one of the most frequent musculoskeletal complaints in the general population with a lifetime prevalence of up to 70%.<sup>1</sup> The overall prognosis is highly variable, with up to 50% of patients still reporting persistent pain 6 to 12 months after seeking an initial primary care consultation.<sup>1</sup> Rotator cuff related shoulder pain (RCRSP), a broad term that includes rotator cuff tendinopathy, tendinitis, tendinosis, partial and atraumatic full-thickness rotator cuff tears, impingement and subacromial pain, accounts for 50 to 85% of diagnoses for shoulder pain.<sup>2</sup>

Several interventions are available for RCRSP such as education, exercise, manual therapy, electrotherapy, injection, medication and surgery. Clinical trials suggest that the long-term outcomes of patients pharmacologically or surgically treated are comparable to those receiving rehabilitation.<sup>6-9</sup> Regardless of modality, treatment is unsuccessful for more than one third of patients who continue to have pain and disability following care. Several reasons may explain this lack of effectiveness and include; psychosocial factors (including kinesiophobia<sup>3</sup> and pain catastrophizing)<sup>4</sup>, occupational factors, lifestyle factors,<sup>5</sup> lack of adherence to the exercise program,<sup>6</sup> low expectations regarding recovery and low levels of self-efficacy<sup>7,8</sup>. Other reasons behind this lack of success might be inadequate choice of exercise.

Education and exercises are two of the most frequently used interventions for RCRSP with evidence supporting their effectiveness.<sup>9-11</sup> Patient education often constitutes the first management strategy in health-related conditions as it doesn't necessitate extensive resources and is available to all. It helps reduce false beliefs and fears related to the pathology as well as increase patient's knowledge of their condition in order to improve their self-efficacy.<sup>9</sup> However, education alone might not be sufficient for all patients, as some may present deficits such as muscular weakness or inhibition, altered shoulder muscle recruitment patterns and kinematics.<sup>12,13</sup> These deficits might explain the persistence of symptoms in some patients. Recent systematic reviews strongly recommend with low to moderate quality evidence that exercises be prioritized as a first line intention treatment since it presents better outcome on pain and function than placebo or wait-and-see.<sup>14,15</sup> However, we still don't know which types of exercise are better and thus lead to better outcomes.<sup>13</sup> Motor control exercises have been shown to reduce pain and disability in individuals with RCRSP.<sup>10</sup> One rationale behind these effects is that improving muscle recruitment patterns and kinematics could prevent the compression of the subacromial soft tissues underneath the coracoacromial arch as the arm elevates.<sup>12</sup> Apart from this potential explanation that is still debated,<sup>2</sup> efficiency of motor control exercises might reside in the reduction of fear-avoidance behavior or pain catastrophizing as the patients are encouraged to move in previously feared positions.<sup>16</sup> It could also have a direct neurophysiological central effect on pain-related brain areas, similar to the one observed with manual therapy,<sup>17,18</sup> and bring change in pain sensitivity and sensorimotor processing. On the other hand, by progressively loading contractile tissue, strengthening exercises have been shown to decrease pain and muscle weakness.<sup>11</sup> This could be the result of an increased capacity by the tendon to sustain load or to a decrease in rotator cuff tendon inhibition.<sup>19</sup>

Although their clinical usefulness has already been assessed separately,<sup>20,21</sup> no study has directly compared those three interventions for the management of RCRSP in order to better highlight recovery over time as well as the choice of intervention provided. Identifying the most effective and efficient intervention(s) for RCRSP is of paramount importance to prevent symptoms persistence, limit health care costs associated with these disorders and all resulting consequences.

### Objective and hypotheses

The primary objective of this randomized controlled trial (RCT) is to compare the short, mid and long-term effects of three different approaches (education, strengthening, motor control) of delivering shoulder management on the symptoms and functional limitations of individuals with RCRSP. A

secondary objective is to explore the effects of the programs on shoulder control (acromiohumeral distance), subacromial structures (supraspinatus and infraspinatus tendon thickness) kinesiophobia and catastrophisation related to shoulder pain. The hypothesis is that both exercises groups will demonstrate a better outcome in pain and function compared to the education group. The motor control program should lead to a quicker improvement in symptoms and functional limitations than the strengthening program because, by improving muscle recruitment patterns, it will decrease control deficits and thus lower the odds of individuals experiencing pain. Its effect on kinesiophobia should also contribute to a quicker reintegration of movements into patients' life, hence improve function. Finally, all groups should lead to a decrease in kinesiophobia and pain catastrophisation, but the motor control and strengthening groups should lead to a greater reduction since participants will be guided to move in amplitudes that were previously limited by pain or pain-related fears or perform near-maximal intensity muscle contractions.

## METHODS AND ANALYSIS

### Study Design

This single-blind parallel group RCT will include 5 evaluation sessions over 24 weeks (baseline, 3, 6, 12 and 24 weeks), 6 intervention sessions over 12 weeks for both exercises groups and 2 education sessions over 12 weeks for the education group (Figure 1). All participants will take part in the baseline evaluation. They will complete self-administered questionnaires on sociodemographic characteristics, symptomatology, comorbidities, functional limitations, kinesiophobia, and pain catastrophizing using self-reported questionnaires. Then, ultrasonographic (US) measurements of the acromiohumeral distance (ADH) and of the supraspinatus (SS) and infraspinatus (IS) tendons thickness will be conducted. Thereafter, participants will be randomly assigned to one of three intervention groups, and take part in their assigned program. All study outcomes will be reevaluated at 12 weeks, while the self-administered questionnaires will also be re-administrated at 3, 6- and 24-weeks using web-based questionnaires. A global rating of change question will be completed at 3, 6, 12 and 24 weeks. The study will be conducted at the *Centre interdisciplinaire de recherche en réadaptation et en intégration sociale* (CIRIS). This RCT is registered on ClinicalTrials.gov (NCT03892603) and we used the SPIRIT checklist when writing our report.<sup>22</sup>

### INSERT FIGURE 1

### Participants and Sample size

Adults presenting with RCRSP will be recruited using the following inclusion criteria: 1) 18-75 years of age, 2) symptoms lasting longer than 3 months, 3) presence of a painful arc in flexion or abduction, 4) presence of a positive Neer sign or Hawkins' Kennedy Test, 5) presence of pain when resisting humeral external rotation or abduction, or positive Jobe Test, and 6) ability to speak English or French. A positive cluster of criteria 3, 4 and 5 represents an adequate diagnostic tool for RCRSP (Sn: 0.75, Sp: 0.74).<sup>23</sup> Participants will be excluded if they present any of the following criteria: 1) clinical signs of massive rotator cuff tears as defined by presence of gross weakness in the absence of limited pain, 2) other shoulder disorders e.g. adhesive capsulitis, severe osteoarthritis, fracture, dislocation, severe acromioclavicular joint pathology, 3) previous shoulder surgery, 4) presence of significant co-morbidity e.g. neurological disorders, rheumatoid arthritis, 5) current or past carcinoma, 6) unlikely to be able to perform required clinical assessment tasks or attend the required evaluation and intervention sessions, 7) symptomatic cervical spine pathology, defined as reproduction of symptoms with active physiological cervical spine movements, and 8) corticosteroid injection in the last 6 weeks. All recruited participants will be evaluated by a physiotherapist in order to confirm their eligibility.

Based on our sample size calculation, calculated for our primary outcome (*QuickDASH*), **41 participants are required per group** (G\*Power 3.1.9; effect size: 0.80,  $\alpha = 0.05$ , Power = 0.95, SD =

1  
2 171 13 DASH points, clinically important difference (CID) = 11 DASH points, expected lost at follow-up =  
3 172 15%). Therefore, 123 patients with RCRSP will be recruited. This sample size should be sufficient to  
4 173 detect a clinically important difference (CID) between groups.  
5

6 174 Potential participants will be recruited in outpatient physiotherapy clinics of hospitals and in private  
7 175 physiotherapy clinics in the Quebec City region, and through electronic mailing lists of employees and  
8 176 students at *Université Laval* (> 52,000 individuals). Since our research team has performed studies  
9 177 evaluating the same population in the same metropolitan area, we are confident to recruit the targeted  
10 178 population.<sup>24–26</sup> With an average rate of 7 new participants per month, we estimate that 18 months will  
11 179 be ample time to reach our goal of 123 participants.

### 13 180 **Randomisation and blinding**

14

15 181 A randomisation list has been generated prior to the initiation of the study by an independent research  
16 182 assistant not involved in data collection using a random number generator. Allocation is concealed in  
17 183 sealed and opaque envelopes that are sequentially numbered. Randomisation was stratified to ensure  
18 184 balance of the treatment groups with respect to sex (male / female) and age (18-55 / 55-75). A blocked  
19 185 randomisation was also used to make sure that three equal groups of 41 participants will be obtained  
20 186 (random blocks of 3, 6 or 9). Given that it is impossible to blind the treating PT and participants, a single-  
21 187 blind design will be used. To reduce potential contamination bias, the three programs will be given at  
22 188 different time periods. Further, participants will be instructed not to discuss their group assignment,  
23 189 exercises performed, or advice received with other potential participants and with the evaluator. To  
24 190 evaluate the effectiveness of blinding at the 3 month follow-up, the evaluator will answer the following  
25 191 question: *What intervention do you think the participant received?*; with one of the following answers:  
26 192 1) Education and advice, 2) Strengthening, 3) Motor control, or 4) No idea. If they answer 1, 2 and 3,  
27 193 they will have to explain why they think the participant received this intervention.

### 30 194 **Interventions:**

31

32 195 Advice and education program: During two education sessions of 30 minutes each, participants will be  
33 196 given written information about the shoulder (anatomy and function), basic pain science and will be  
34 197 directed to watch a series of six educational videos on shoulder pain and function, persistent pain,  
35 198 physical activity, stress, sleep and eating habits. For each video, they will have two questions to answer:  
36 199 1) What was the most important message? and 2) Was there anything you didn't understand in the video?  
37 200 The comprehensive written information includes advices on:

- 39 201 • The shoulder and their condition
- 40 202 • The relevance of pain
- 41 203 • Pain management (night and day)
- 42 204 • Activity modification (when to increase and decrease)
- 43 205 • Reassurance

48 206 Shoulder muscle strengthening program: In addition to the same advice and education the control group  
49 207 receives, participants from this group will be given a shoulder progressive strengthening exercises  
50 208 program (based on 1 RM) that will involve concentric and eccentric contractions with free weights and  
51 209 resistance elastic tubes. Exercises will target humeral internal/external rotators and abductors and the  
52 210 scapular muscles (protractors, retractors, elevators and depressors). Number of repetitions will be one set  
53 211 of the maximum number of repetitions until muscular exertion or until pain reaches 3/10. Participants  
54 212 will be asked to complete the exercises every day for 12 weeks. At each session with the therapist (6 over  
55 213 a 12-week period), shoulder movements and strength will be reassessed, and the program will be  
56 214 progressed accordingly. Any questions or concerns will also be addressed, and participants will be  
57 214  
58



1  
2 215 requested to complete a digital record of their exercise adherence.

3  
4 216 **INSERT SUPPLEMENTARY FILE 1**

5 217 Motor control and functional rehabilitation exercise program: Participants will receive the same advice  
6 218 and education as the other groups as well as a motor control exercises program. Each session (6 over a  
7 219 12-week period) will start with a pain neuro-modulatory (motor control) technique in order to look at the  
8 220 influence of different corrections to alleviate symptoms during upper limb movements. A series of quick  
9 221 clinical tests will be conducted taking no more than 3 minutes. The tests will be performed in a sequential  
10 222 format through three key areas: thoracic ‘finger on sternum technique’, scapular facilitation, ‘humeral  
11 223 head’ procedures.<sup>27,28</sup> If a technique reduces pain, that technique will then be performed as exercises and  
12 224 incorporated into the participant’s functional movement. In addition, motor control exercises during arm  
13 225 elevation, progressed through a standardized 6-phase retraining sequence, will be executed.<sup>24,29–31</sup>  
14 226 Retraining phases will be graded according to: 1) resistance applied to the shoulder; and 2) use or non-  
15 227 use of feedback. Once participants have reached pain free execution, the program will be progressed into  
16 228 re-education exercises according to the participants’ work, sports and activities of daily living and  
17 229 incorporate a series of functional activities involving the whole body. Number of repetitions will vary  
18 230 from one to three sets of 10 to 30 repetitions. Participants will be asked to complete the exercises every  
19 231 day. Participants will be requested to complete a digital record of their exercise adherence.

20 232 Both exercise groups will be given information about pain related to the execution of their exercise  
21 233 program (Supplementary file 3).

22  
23 234 **INSERT SUPPLEMENTARY FILE 2**

24 235 **INSERT SUPPLEMENTARY FILE 3**

### 25 236 **Data collection**

26 237 An evaluator blinded to group assignment will perform all evaluations according to standardised  
27 238 procedures.

28 239 Symptoms & Functional limitations will be evaluated using the *QuickDASH* (generic questionnaire  
29 240 assessing any upper limb disorders), the primary outcome, as well as two other validated self-reported  
30 241 questionnaires: Western Ontario Rotator Cuff index (WORC; specific to RCRSP), and the short form of  
31 242 Brief Pain Inventory (BPI-SF). The *QuickDASH* is a self-reported questionnaire that includes 11 items  
32 243 measuring physical disability and symptoms of the upper extremity. It presents excellent reliability, is  
33 244 responsive to change, has a MDC and CID around 11%.<sup>32</sup> The WORC index is a disease-specific  
34 245 questionnaire developed to measure, pain, function and health related quality-of-life of individuals  
35 246 suffering from RCRSP. It contains 21 items divided into five sections: physical symptoms,  
36 247 sports/recreation, work, lifestyle and emotions. It has demonstrated excellent reliability, is responsive to  
37 248 change for patients with RCRSP, has a MDC around 12% and a CID varying from 12% to 13%.<sup>33</sup> Finally,  
38 249 the BPI-SF is a validated questionnaire used to assess the intensity of pain and the interference of the  
39 250 pain on the patient's life. It has shown to be reliable, internally consistent over time and valid with several  
40 251 MSK population including RCRSP.<sup>34</sup>

41 252 Pain-related fear & catastrophizing: The Tampa Scale of Kinesiophobia (TSK) is a self-administered  
42 253 questionnaire that measures beliefs and behaviours related with pain, specially focusing on beliefs that  
43 254 pain is damaging and painful movements should be avoided.<sup>35</sup> The psychometric properties of the TSK  
44 255 have been confirmed for different pain disorders.<sup>36</sup> The Pain Catastrophizing Scale (PCS) is a self-  
45 256 administered questionnaire measuring the range of catastrophic thoughts and feelings (magnified threat,  
46 257 ruminating thoughts and feelings of helplessness) associated with pain that individuals may experience.  
47 258 High internal reliability has been reported in patients with chronic pain with adequate validity and test-  
48 259 retest reliability.<sup>37</sup>

1  
2 260 *US measurement of acromiohumeral distance and supraspinatus and infraspinatus tendon* will be  
3 261 assessed with a 12-MHz linear array probe (Logic e9, GE Healthcare, Milwaukee, WI, USA). US images  
4 262 of AHD will be obtained with the participants seated in a standardized position with the arm at rest and  
5 263 at 60° of active abduction. US measures will be obtained by placing the transducer on the anterior aspect  
6 264 of the lateral surface of acromion along the longitudinal axis of the humerus in a frontal plane. The AHD  
7 265 will be measured using the built-in electronic caliper option by manually locating the superior aspect of  
8 266 the humeral head and the inferior aspect of acromion and then measuring the shortest linear distance  
9 267 between those two landmarks. For each upper limb position, three measurements will be taken (intraclass  
10 268 correlation coefficient [ICC]: 0.98; MDC: 0.7 mm).<sup>38</sup> Thickness of the supraspinatus (SS) tendon will be  
11 269 obtained with the medial aspect of the wrist against the ipsilateral anterior superior iliac spine. Measures  
12 270 will be obtained with the transducer perpendicularly, one centimeter behind to the anterolateral aspect of  
13 271 the surface of the acromion. The thickness of the SS tendon borders will be defined inferiorly as the first  
14 272 hyperechoic region above the anechoic articular cartilage of the humeral head, and the hyperechoic  
15 273 superior border of the tendon before the anechoic subdeltoid bursa. Infraspinatus tendon thickness will  
16 274 be measured at the level of the posterior border of the acromion with the hand placed on the opposite  
17 275 shoulder. The thickness of the IS tendon borders will be defined inferiorly as the first hyperechoic region  
18 276 above the anechoic articular cartilage of the humeral head, and the hyperechoic superior border of the  
19 277 tendon. These US tendon measures have been shown reliable (ICC > 0.92).<sup>38</sup>

### 23 278 **Withdrawal of individuals participants**

24  
25 279 All dropouts and their underlying reasons will be reported. Principles underlying ‘intention-to-treat’  
26 280 analysis will be followed, meaning that every participant will be analyzed according to the randomized  
27 281 treatment assignment. Therefore, non-compliance, protocol deviation and withdrawal will all be ignored  
28 282 in the primary analyses. Additionally, ‘per-protocol’ analysis (i.e., the analysis will be restricted to  
29 283 participants who adhered to the intervention as stipulated in the protocol) will also be performed. To  
30 284 ensure appropriate insight of mechanisms underlying changes in symptoms and function, only  
31 285 participants who completed evaluation at week 12 will be considered for the US-based outcomes. Any  
32 286 harm or unintended effects during the interventions will be recorded.

### 34 287 **Data integrity and analysis**

35  
36 288 All collected data will be accessible only to the research team. All data will be kept for 5 years after the  
37 289 end of the study to ensure the completion of planned publications. After this period, all data will be  
38 290 destroyed.

### 40 291 **Statistical Analyses**

41  
42 292 Descriptive statistics will be used for all outcome measures at each measurement time to summarise  
43 293 results. Baseline demographic data will be compared (independent *t*-tests and Chi-squared tests) to  
44 294 establish the comparability of groups. All data will be tested to check the distributional assumptions for  
45 295 inferential statistical analyses. A 2-way repeated-measures ANOVA (3 interventions [Control or  
46 296 Strengthening or Motor control] x 5 Time [0, 3, 6, 12 and 24 weeks]) will be used to analyse and compare  
47 297 the effects of the three programs on primary outcome (quick-DASH) as well as secondary outcomes (X  
48 298 2 time for the US-based outcomes [0 and 12 weeks]) (SPSS 25, proc GENLIN). Alpha level was set at  
49 299 0.05.

### 51 300 **Patient and Public Involvement**

52  
53 301 This research was done without patient involvement. Patients were not invited to comment on the study  
54 302 design and were not consulted to develop patient relevant outcomes or interpret the results. Patients were  
55 303 not invited to contribute to the writing or editing of this document for readability or accuracy.

### 57 304 **DISCUSSION**

1  
2 305 It is essential to develop and identify effective interventions for the management of shoulder pain since  
3 306 it may become chronic and lead to harmful consequences. Among these are a decreased participation and  
4 307 quality of life, absenteeism at work, early retirement, multiple medical consultations as well as high  
5 308 associated health costs. As stated earlier, up to 30% of individuals with RCRSP still present pain and  
6 309 disability after rehabilitation interventions such as rehabilitation exercises. A recent study conducted by  
7 310 our research team showed that a rehabilitation program comprising mainly motor control exercises led  
8 311 to fewer than 15% of individuals showing unsatisfactory results.<sup>24</sup> In order to further decrease this  
9 312 percentage, we have attempted to compare different bonified exercise programs. We have added  
10 313 exercises targeting the whole body, not only the shoulder, to our motor control program because we  
11 314 believe it is essential to involve the whole body since deficits in trunk or lower limb capacity may  
12 315 overload the upper limb during ADL's. On the other hand, multiple studies have shown promising results  
13 316 from strengthening programs primarily targeting shoulder abductors and external rotators.<sup>2</sup> We believe  
14 317 that adding strengthening exercises for other shoulder muscles such as scapular muscles could lead to  
15 318 even better results. Defining more efficient rehabilitation regimens for common conditions such as  
16 319 RCRSP is therefore important as it may lead to a reduction in associated costs. Therefore, the present  
17 320 study will establish the effectiveness of these two programs and determine if one is more effective than  
18 321 the other or more effective than education.

## 22 322 ETHICS

23  
24 323 Ethics approval was obtained from the sectorial rehabilitation and social integration research ethics  
25 324 committee of the CIUSSS-CN (#2019-1762).

## 26 325 Consent

27  
28 326 Detailed information about the research and experimental procedures will be provided to all participants  
29 327 before signature of the written informed consent. Participants will be requested to sign a detailed  
30 328 informed consent before starting any experimental procedure

## 32 329 Confidentiality

33  
34 330 All research team members will respect the data confidentiality of the patients, in agreement with the  
35 331 law. Patients' names will be coded to keep their identity confidential; however, a list of name and  
36 332 respective codes will be stored in a locked and filing cabinet. All information collected during the study,  
37 333 including test results, will be treated as confidential. The trial data set will be accessible only to the  
38 334 research team and the Ethics Committee of the CIUSSS-CN for purposes of management or audit of  
39 335 research development. Publications related to these data will respect all principles of confidentiality.

## 41 336 Dissemination

42  
43 337 Results of this protocol will be disseminated through international publication in peer-reviewed journals,  
44 338 in addition to international conference presentations. Participants, clinicians and relevant research staff  
45 339 in the field will be informed about the results of the study.

## References

1. Cadogan A, Laslett M, Hing WA, McNair PJ, Coates MH. A prospective study of shoulder pain in primary care: prevalence of imaged pathology and response to guided diagnostic blocks. *BMC Musculoskelet Disord*. 2011;12:119. doi:10.1186/1471-2474-12-119
2. Lewis J. Rotator cuff related shoulder pain: Assessment, management and uncertainties. *Man Ther*. 2016;23:57-68. doi:10.1016/j.math.2016.03.009
3. Thompson EL, Broadbent J, Bertino MD, Staiger PK. Do Pain-related Beliefs Influence Adherence to Multidisciplinary Rehabilitation?: A Systematic Review. *Clin J Pain*. 2016;32(2):164-178. doi:10.1097/AJP.0000000000000235
4. Sandford FM, Sanders TAB, Lewis JS. Exploring experiences, barriers, and enablers to home- and class-based exercise in rotator cuff tendinopathy: A qualitative study. *J Hand Ther Off J Am Soc Hand Ther*. 2017;30(2):193-199. doi:10.1016/j.jht.2017.05.001
5. Dean E, Söderlund A. What is the role of lifestyle behaviour change associated with non-communicable disease risk in managing musculoskeletal health conditions with special reference to chronic pain? *BMC Musculoskelet Disord*. 2015;16:87. doi:10.1186/s12891-015-0545-y
6. Dean B, Carr AJ, Gwilym SE. Why does my shoulder hurt? A review of the neuroanatomical and biochemical basis of shoulder pain. *Br J Sports Med*. 2013;47(17):1095-1104. doi:10.1136/bjsports-2012-091492
7. Chester R, Khondoker M, Shepstone L, Lewis JS, Jerosch-Herold C. Self-efficacy and risk of persistent shoulder pain: results of a Classification and Regression Tree (CART) analysis. *Br J Sports Med*. 2019;53(13):825-834. doi:10.1136/bjsports-2018-099450
8. Chester R, Jerosch-Herold C, Lewis J, Shepstone L. Psychological factors are associated with the outcome of physiotherapy for people with shoulder pain: a multicentre longitudinal cohort study. *Br J Sports Med*. 2018;52(4):269-275. doi:10.1136/bjsports-2016-096084
9. Carlson H, Carlson N. An Overview of the Management of Persistent Musculoskeletal Pain. *Ther Adv Musculoskelet Dis*. 2011;3(2):91-99. doi:10.1177/1759720X11398742
10. De Mey K, Danneels L, Cagnie B, Cools AM. Scapular Muscle Rehabilitation Exercises in Overhead Athletes With Impingement Symptoms: Effect of a 6-Week Training Program on Muscle Recruitment and Functional Outcome. *Am J Sports Med*. 2012;40(8):1906-1915. doi:10.1177/0363546512453297
11. Maenhout AG, Mahieu NN, De Muynck M, De Wilde LF, Cools AM. Does adding heavy load eccentric training to rehabilitation of patients with unilateral subacromial impingement result in better outcome? A randomized, clinical trial. *Knee Surg Sports Traumatol Arthrosc Off J ESSKA*. 2013;21(5):1158-1167. doi:10.1007/s00167-012-2012-8
12. Seitz AL, Podlecki LA, Melton ER, Uhl TL. NEUROMUSCULAR ADAPTIONS FOLLOWING A DAILY STRENGTHENING EXERCISE IN INDIVIDUALS WITH ROTATOR CUFF RELATED SHOULDER PAIN: A PILOT CASE-CONTROL STUDY. *Int J Sports Phys Ther*. 2019;14(1):74-87.
13. Shire AR, Stær TAB, Overby JB, Bastholm Dahl M, Sandell Jacobsen J, Høyrup Christiansen D. Specific or general exercise strategy for subacromial impingement syndrome--does it matter? A systematic literature review and meta analysis. *BMC Musculoskelet Disord*. 2017;18(1):158. doi:10.1186/s12891-017-1518-0
14. Gebremariam L, Hay EM, van der Sande R, Rinkel WD, Koes BW, Huisstede BMA. Subacromial impingement syndrome--effectiveness of physiotherapy and manual therapy. *Br J Sports Med*. 2014;48(16):1202-1208. doi:10.1136/bjsports-2012-091802
15. Steuri R, Sattelmayer M, Elsig S, et al. Effectiveness of conservative interventions including exercise, manual therapy and medical management in adults with shoulder impingement: a systematic review and meta-analysis of RCTs. *Br J Sports Med*. 2017;51(18):1340-1347. doi:10.1136/bjsports-

- 1  
2 388 2016-096515
- 3 389 16. Vaegter HB, Madsen AB, Handberg G, Graven-Nielsen T. Kinesiophobia is associated with  
4 390 pain intensity but not pain sensitivity before and after exercise: an explorative analysis. *Physiotherapy*.  
5 391 2018;104(2):187-193. doi:10.1016/j.physio.2017.10.001
- 6 392 17. Roy J-S, Bouyer LJ, Langevin P, Mercier C. Beyond the Joint: The Role of Central Nervous  
8 393 System Reorganizations in Chronic Musculoskeletal Disorders. *J Orthop Sports Phys Ther*.  
9 394 2017;47(11):817-821. doi:10.2519/jospt.2017.0608
- 10 395 18. Ellingson LD, Stegner AJ, Schwabacher IJ, Koltyn KF, Cook DB. Exercise Strengthens Central  
11 396 Nervous System Modulation of Pain in Fibromyalgia. *Brain Sci*. 2016;6(1).  
12 397 doi:10.3390/brainsci6010008
- 13 398 19. Michener LA, Subasi Yesilyaprak SS, Seitz AL, Timmons MK, Walsworth MK. Supraspinatus  
14 399 tendon and subacromial space parameters measured on ultrasonographic imaging in subacromial  
16 400 impingement syndrome. *Knee Surg Sports Traumatol Arthrosc Off J ESSKA*. 2015;23(2):363-369.  
17 401 doi:10.1007/s00167-013-2542-8
- 18 402 20. Savoie A, Mercier C, Desmeules F, Frémont P, Roy J-S. Effects of a movement training  
19 403 oriented rehabilitation program on symptoms, functional limitations and acromiohumeral distance in  
20 404 individuals with subacromial pain syndrome. *Man Ther*. 2015;20(5):703-708.  
21 405 doi:10.1016/j.math.2015.04.004
- 22 406 21. Worsley P, Warner M, Mottram S, et al. Motor control retraining exercises for shoulder  
24 407 impingement: effects on function, muscle activation, and biomechanics in young adults. *J Shoulder*  
25 408 *Elbow Surg*. 2013;22(4):e11-19. doi:10.1016/j.jse.2012.06.010
- 26 409 22. Chan A-W, Tetzlaff JM, Altman DG, et al. SPIRIT 2013 Statement: Defining Standard Protocol  
27 410 Items for Clinical Trials. *Ann Intern Med*. 2013;158(3):200-207. doi:10.7326/0003-4819-158-3-  
28 411 201302050-00583
- 29 412 23. Michener LA, Walsworth MK, Doukas WC, Murphy KP. Reliability and diagnostic accuracy of  
30 413 5 physical examination tests and combination of tests for subacromial impingement. *Arch Phys Med*  
32 414 *Rehabil*. 2009;90(11):1898-1903. doi:10.1016/j.apmr.2009.05.015
- 33 415 24. Belley AF, Mercier C, Bastien M, Léonard G, Gaudreault N, Roy J-S. Anodal Transcranial  
34 416 Direct-Current Stimulation to Enhance Rehabilitation in Individuals With Rotator Cuff Tendinopathy:  
35 417 A Triple-Blind Randomized Controlled Trial. *J Orthop Sports Phys Ther*. 2018;48(7):541-551.  
36 418 doi:10.2519/jospt.2018.7871
- 37 419 25. Dupuis F, Barrett E, Dubé M-O, McCreesh KM, Lewis JS, Roy J-S. Cryotherapy or gradual  
39 420 reloading exercises in acute presentations of rotator cuff tendinopathy: a randomised controlled trial.  
40 421 *BMJ Open Sport Exerc Med*. 2018;4(1):e000477. doi:10.1136/bmjsem-2018-000477
- 41 422 26. Oliveira L de, Carlos F. Effects of kinesiotaping on symptoms, functional limitations, and  
42 423 underlying deficits on individuals with rotator cuff tendinopathy. 2018.  
43 424 <https://corpus.ulaval.ca/jspui/handle/20.500.11794/33618>. Accessed April 17, 2020.
- 44 425 27. Lewis JS. Rotator cuff tendinopathy/subacromial impingement syndrome: is it time for a new  
45 426 method of assessment? *Br J Sports Med*. 2009;43(4):259-264. doi:10.1136/bjsem.2008.052183
- 46 427 28. Lewis JS, McCreesh K, Barratt E, Hegedus EJ, Sim J. Inter-rater reliability of the Shoulder  
48 428 Symptom Modification Procedure in people with shoulder pain. *BMJ Open Sport — Exerc Med*.  
49 429 2016;2(1). doi:10.1136/bmjsem-2016-000181
- 50 430 29. Roy J-S, Moffet H, Hébert LJ, Lirette R. Effect of motor control and strengthening exercises on  
51 431 shoulder function in persons with impingement syndrome: a single-subject study design. *Man Ther*.  
52 432 2009;14(2):180-188. doi:10.1016/j.math.2008.01.010
- 53 433 30. Roy J-S, Moffet H, McFadyen BJ, Lirette R. Impact of movement training on upper limb motor  
55 434 strategies in persons with shoulder impingement syndrome. *Sports Med Arthrosc Rehabil Ther Technol*  
56 435 *SMARTT*. 2009;1(1):8. doi:10.1186/1758-2555-1-8
- 57 436 31. Roy J-S, Moffet H, McFadyen BJ. The effects of unsupervised movement training with visual  
58

- 1  
2 437 feedback on upper limb kinematic in persons with shoulder impingement syndrome. *J Electromyogr*  
3 438 *Kinesiol Off J Int Soc Electrophysiol Kinesiol.* 2010;20(5):939-946. doi:10.1016/j.jelekin.2009.10.005  
4 439 32. Mintken PE, Glynn P, Cleland JA. Psychometric properties of the shortened disabilities of the  
5 440 Arm, Shoulder, and Hand Questionnaire (QuickDASH) and Numeric Pain Rating Scale in patients with  
6 441 shoulder pain. *J Shoulder Elbow Surg.* 2009;18(6):920-926. doi:10.1016/j.jse.2008.12.015  
7 442 33. St-Pierre C, Dionne CE, Desmeules F, Roy J-S. Reliability, validity, and responsiveness of a  
8 443 Canadian French adaptation of the Western Ontario Rotator Cuff (WORC) index. *J Hand Ther Off J*  
9 444 *Am Soc Hand Ther.* 2015;28(3):292-298; quiz 299. doi:10.1016/j.jht.2015.02.001  
10 445 34. Mendoza T, Mayne T, Rublee D, Cleland C. Reliability and validity of a modified Brief Pain  
11 446 Inventory short form in patients with osteoarthritis. *Eur J Pain Lond Engl.* 2006;10(4):353-361.  
12 447 doi:10.1016/j.ejpain.2005.06.002  
13 448 35. Kori S. Kinesiophobia: A new view of chronic pain behavior. *Pain Management.* 1990:35-43.  
14 449 36. Woby SR, Roach NK, Urmston M, Watson PJ. Psychometric properties of the TSK-11: a  
15 450 shortened version of the Tampa Scale for Kinesiophobia. *Pain.* 2005;117(1-2):137-144.  
16 451 doi:10.1016/j.pain.2005.05.029  
17 452 37. Sullivan M, Bishop S, Pivik J. The Pain Catastrophizing Scale: Development and Validation.  
18 453 *Psychol Assess.* 1996;7:524-532. doi:10.1037//1040-3590.7.4.524  
19 454 38. McCreesh KM, Anjum S, Crotty JM, Lewis JS. Ultrasound measures of supraspinatus tendon  
20 455 thickness and acromiohumeral distance in rotator cuff tendinopathy are reliable. *J Clin Ultrasound*  
21 456 *JCU.* 2016;44(3):159-166. doi:10.1002/jcu.22318  
22 457  
23  
24  
25  
26  
27  
28  
29  
30  
31  
32  
33  
34  
35  
36  
37  
38  
39  
40  
41  
42  
43  
44  
45  
46  
47  
48  
49  
50  
51  
52  
53  
54  
55  
56  
57  
58  
59  
60

1  
2 458 **Author statement**

3  
4 459 MOD contributed to conception, design and preparation of the procedures, and data collection, and will  
5 460 conduct the recruitment, interventions, interpretation, data analyses and writing. FD and JSR contributed  
6 461 to study design and will contribute to the statistical analysis and interpretation of the data. JL contributed  
7 462 to conception, design and preparation of the procedures. All authors commented on the study protocol.  
8 463 All authors approved its final version.

9 464

10  
11  
12 465 **Funding**

13  
14 466 This work was supported by the Quebec Rehabilitation Research Network (REPAR). MOD received a  
15 467 Master's training scholarship from the Fonds de Recherche Québec-Santé (FRQS). JSR and FD are  
16 468 supported by salary awards from the Canadian Institutes of Health Research (CIHR).

17  
18 469

19 470 **Competing interests statement**

20  
21 471 All authors declare that they have no competing interests.

22

23

24

25

26

27

28

29

30

31

32

33

34

35

36

37

38

39

40

41

42

43

44

45

46

47

48

49

50

51

52

53

54

55

56

57

58

59

60

**Figure 1:** Schematic diagram of the study design. *QuickDASH*, Abbreviated version of the Disabilities of the Arm, Shoulder and Hand questionnaire; WORC, Western Ontario Rotator Cuff Index; BPI, Brief Pain Inventory; TSK, Tampa Scale of Kinesiophobia; PCS, Pain Catastrophizing Scale; AHD, Acromiohumeral distance; SST, supraspinatus tendon; IST, infraspinatus tendon; GRC, Global rating of change

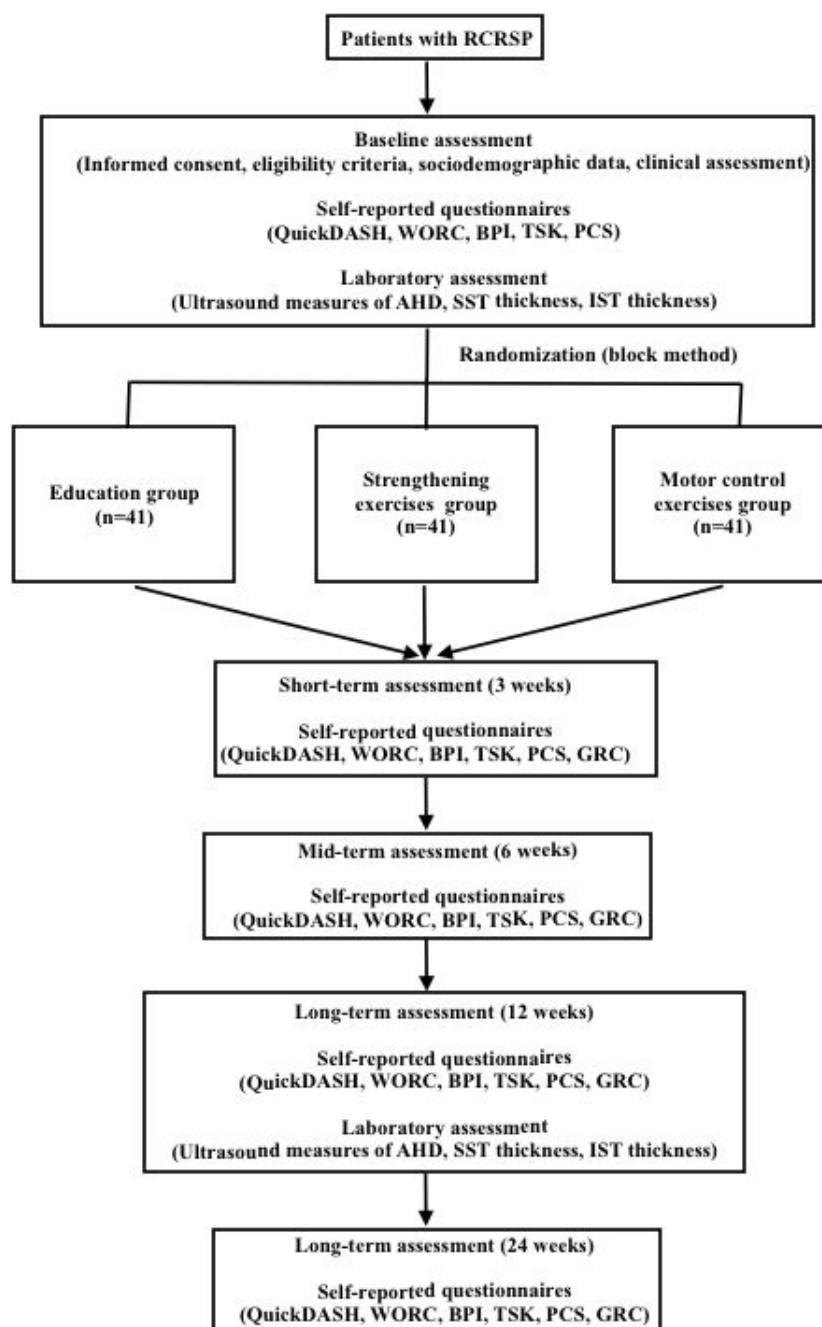



**Supplementary file 1: Shoulder muscles strengthening program.**

| <b>EXERCISES PROGRAM</b>                                                                                                                                                                                                                                                                                                                                                       |                                                                                     |                                                                                       |
|--------------------------------------------------------------------------------------------------------------------------------------------------------------------------------------------------------------------------------------------------------------------------------------------------------------------------------------------------------------------------------|-------------------------------------------------------------------------------------|---------------------------------------------------------------------------------------|
| <b>A) SHOULDER EXTERNAL ROTATION</b>                                                                                                                                                                                                                                                                                                                                           |                                                                                     |                                                                                       |
| <p><b>1. Shoulder external rotation at 0°</b></p> <ul style="list-style-type: none"> <li>• Hold a weight in your hand.</li> <li>• Lie on the opposite side of the hand holding the weight.</li> <li>• With the trunk upright, flex the elbow 90 degrees. Tighten the abs.</li> <li>• Lift the weight so that your hand is upward, keeping your elbow at 90 degrees.</li> </ul> | 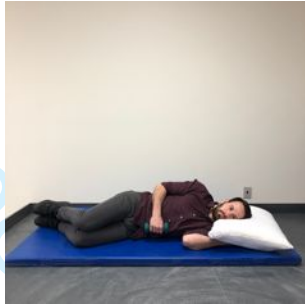   |    |
| <p><b>2. Shoulder external rotation at 45°</b></p> <ul style="list-style-type: none"> <li>• Hold a weight in your hand.</li> <li>• With the trunk upright, flex the elbow 90 degrees. Tighten the abs.</li> <li>• Lift your arm to 90° of abduction while</li> </ul>                                                                                                           |  |  |

|                                                                                                                                                                                                                                                                                                                                                                                                      |                                                                                      |  |
|------------------------------------------------------------------------------------------------------------------------------------------------------------------------------------------------------------------------------------------------------------------------------------------------------------------------------------------------------------------------------------------------------|--------------------------------------------------------------------------------------|--|
| <p>keeping your elbow flexed at 90°.</p> <ul style="list-style-type: none"> <li>Lift the weight in order to bring your hand upwards and backwards while keeping your elbow flexed at 90° and your arm abducted at 45°.</li> </ul>                                                                                                                                                                    |                                                                                      |  |
| <p><b>B) SHOULDER INTERNAL ROTATION</b></p>                                                                                                                                                                                                                                                                                                                                                          |                                                                                      |  |
| <p><b>1. Shoulder internal rotation at 0°</b></p> <ul style="list-style-type: none"> <li>Tie an elastic band level to your hips. Turn aside.</li> <li>With your trunk straight, flex the elbow 90 degrees. Tighten the abs.</li> <li>Pull the elastic to bring the hand from the outside to the inside, make sure that the elbow does not take off from the body. Keep the elbow at 90 °.</li> </ul> | 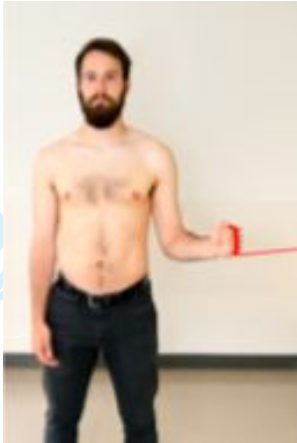  |  |
| <p><b>C) ARM ELEVATION (SCAPTION)</b></p>                                                                                                                                                                                                                                                                                                                                                            |                                                                                      |  |
| <p><b>1. Scaption with weight</b></p> <ul style="list-style-type: none"> <li>Use a weight to make the scaption movement.</li> <li>Raise your arm by keeping your elbow extended in a 45° motion plane.</li> <li>Do not lift the shoulder up or lean the trunk to the opposite side.</li> </ul>                                                                                                       |  |  |

## D) SHOULDER PROTRACTION

### 1. Protraction with weight

- Lie on your back with your knees bent and your back in a neutral position. Contract your abs.
- Raise your arm up to reach 90°. When your arm is upright, push your hand toward the ceiling keeping your back flat, without lifting your shoulders.

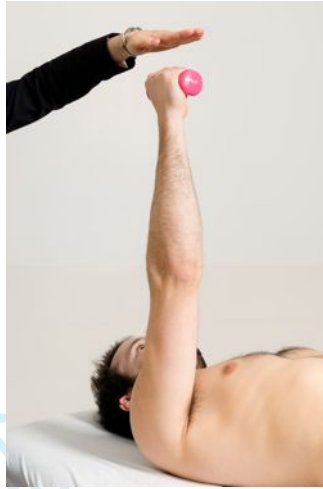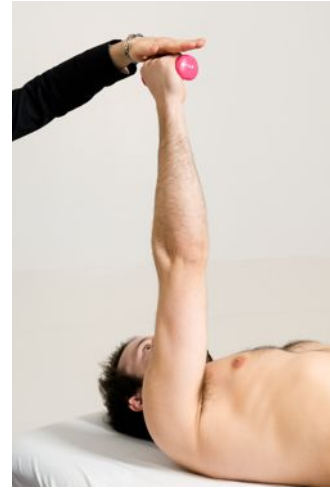

## E) SHOULDER EXTENSION

### 1. Shoulder extension with an elastic band

- With both hands, grasp the ends of a rubber band attached at shoulder height.
- Keep your back straight and your shoulders slightly back. Tighten the abdominals, tuck in the chin.

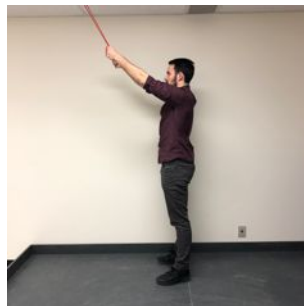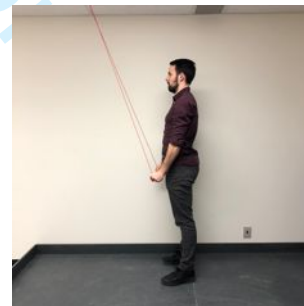

|                                                                                                                                                                                                                                                                                                                                                                                     |                                                                                      |                                                                                       |
|-------------------------------------------------------------------------------------------------------------------------------------------------------------------------------------------------------------------------------------------------------------------------------------------------------------------------------------------------------------------------------------|--------------------------------------------------------------------------------------|---------------------------------------------------------------------------------------|
| <ul style="list-style-type: none"> <li>• With arms outstretched, slowly pull backwards so that your hands are shifted to the outside of your hip. Keep your back straight and your shoulders slightly backwards throughout the exercise.</li> </ul>                                                                                                                                 |                                                                                      |                                                                                       |
| <b>F) HORIZONTAL ABDUCTION</b>                                                                                                                                                                                                                                                                                                                                                      |                                                                                      |                                                                                       |
| <p><b>1. Horizontal abduction with weight</b></p> <ul style="list-style-type: none"> <li>• Lying prone, with your elbow flexed 90° and a weight in each hand.</li> <li>• Lift your arms up 1 or 2 cm without lifting your shoulders from the table.</li> <li>• Extend your elbows.</li> <li>• Flex back your elbows to 90° and lower your arms in the starting position.</li> </ul> |  |  |

**G) ELEVATION****1. Elevation with weight**

- With arms raised about 30 ° to the side, bring both shoulders slightly back and towards the eyes.
- Tighten the abdominals, tuck in the chin.

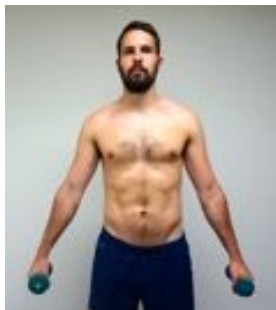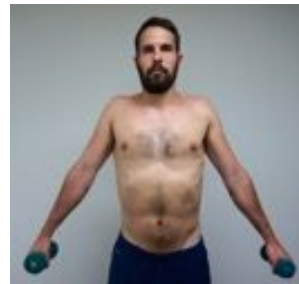

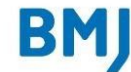

## Consent form

**For a patient's consent to publication of images and/or information about them in BMJ publications.**

Name of patient: \_\_\_\_\_ *Marc-Olivier Dubé* \_\_\_\_\_

Relationship to patient (if patient not signing this form): \_\_\_\_\_

Description of the photo, image, text or other material (**Material**) about the patient. **A copy of the Material must be attached to this form:** \_\_\_\_\_ *Photos for exercise program* \_\_\_\_\_

Provisional title of article in which Material will be included: \_\_\_\_\_ *Rotator cuff related shoulder pain: Does the type of exercise influence the outcomes – Protocol of a randomized controlled trial*

---

### CONSENT

I \_\_\_\_\_ *Marc-Olivier Dubé* \_\_\_\_\_ [PRINT FULL NAME] give my consent for the Material about me/the patient to appear in a BMJ publication.

**I confirm that I:** (please tick boxes to confirm)

- have seen the photo, image, text or other material about me/the patient**
- have read the article to be submitted to BMJ**  **am legally entitled to give this consent.**

I understand the following:

- (1) The Material will be published without my/the patient's name attached, however I understand that complete anonymity cannot be guaranteed. It is possible that somebody somewhere - for example, somebody who looked after me/the patient or a relative - may recognise me/the patient.
- (2) The Material may show or include details of my/the patient's medical condition or injury and any prognosis, treatment or surgery that I have/the patient has, had or may have in the future.

- 1  
2  
3 (3) The article may be published in a journal which is distributed worldwide. BMJ's  
4 publications go mainly to doctors and other healthcare professionals but are  
5 also seen by many others including academics, students and journalists.  
6  
7  
8 (4) The article, including the Material, may be the subject of a press release, and  
9 may be linked to from social media and/or used in other promotional  
10 activities. Once published, the article will be placed on a BMJ website and may  
11 also be available on other websites.  
12  
13 (5) The text of the article will be edited for style, grammar and consistency before  
14 publication.  
15  
16 (6) I/the patient will not receive any financial benefit from publication of the  
17 article.  
18  
19 (7) The article may also be used in full or in part in other publications and products  
20 published by BMJ and/or by other publishers. This includes publication in  
21 English and in translation, in print, in digital formats, and in any other formats  
22 that may be used by BMJ or other publishers now and in the future. The article  
23 may appear in local editions of journals or other publications, published in the  
24 UK and overseas.  
25  
26 (8) I can revoke my consent at any time before publication, but once the article  
27 has been committed to publication ("gone to press") it will not be possible to  
28 revoke the consent.  
29  
30 (9) This consent form will be retained securely and in confidence by BMJ in  
31 accordance with the law, for no longer than necessary. Personal data provided  
32 in this form will be used and retained in accordance with BMJ's Privacy Policy  
33 available at <https://www.bmj.com/company/your-privacy/>.  
34  
35  
36  
37  
38

39 Please tick box to confirm the following:

- 40  
41  Where this consent relates to an article in *BMJ Case Reports*, I have/the patient  
42 has had the opportunity to comment on the article and I am satisfied that the  
43 comments, if any, have been reflected in the article.  
44  
45

46 Signed: Marc-Olivier Dubé

Print name: Marc-Olivier Dubé

47  
48 Address: 2507-2818 Boulevard Laurier  
49 marcolivier.dub@gmail.com

Email address:

50  
51 G1V0E2 Quebec (Qc), Canada

Telephone no: 418-906-2071

52  
53 If signing on behalf of the patient, please give the reason why the patient can't consent for  
54 themselves (e.g. patient is under 18 or has cognitive or intellectual impairment).  
55  
56  
57  
58  
59

\_\_\_\_\_ Date:

- If you are signing for a family or other group, please tick the box to confirm that all relevant members of the family or group have been informed.

**Details of person who has explained and administered the form** to the patient or their representative (e.g. the corresponding author or other person who has the authority to obtain consent).

Signed: Marc-Olivier Dubé

Print name: Marc-Olivier Dubé

Position: PhD candidate (student)

Address:

Institution: Université Laval

525, boul. Wilfrid-Hamel, Office H-1300

Québec (Québec) G1M 2S8

Email address: marc-olivier.dube.1@ulaval.ca

Telephone no: 418-906-2071

Date: May 1, 2020

Patient consent form 050419



Supplementary file 2: Motor control and functional exercise program.

| <b>EXERCISES PROGRAM</b>                                                                                                                                                                                  |                                                                                     |                                                                                       |
|-----------------------------------------------------------------------------------------------------------------------------------------------------------------------------------------------------------|-------------------------------------------------------------------------------------|---------------------------------------------------------------------------------------|
| <b>A) Exercise 1 : Lower limbs</b>                                                                                                                                                                        |                                                                                     |                                                                                       |
| <p>1.</p> <ul style="list-style-type: none"> <li>• Hold a ball in front of you and bend your knees</li> <li>• Aim for 15 repetitions.</li> </ul>                                                          |    |    |
| <p>2.</p> <ul style="list-style-type: none"> <li>• Perform sit-to-stand for 1 minute.</li> <li>• Stop if you experience significant fatigue or if you reach 1 minute.</li> </ul>                          |   |   |
| <p>3.</p> <ul style="list-style-type: none"> <li>• Continue the same exercise by adding the lifting of one leg and arm from the opposite side as high as possible.</li> <li>• Perform the same</li> </ul> |  |  |

1  
2  
3  
4  
5  
6  
7  
8  
9  
10  
11  
12  
13  
14  
15  
16  
17  
18  
19  
20  
21  
22  
23  
24  
25  
26  
27  
28  
29  
30  
31  
32  
33  
34  
35  
36  
37  
38  
39  
40  
41  
42  
43  
44  
45  
46  
47  
48  
49  
50  
51  
52  
53  
54  
55  
56  
57  
58  
59  
60

|                                                                                                                             |  |  |
|-----------------------------------------------------------------------------------------------------------------------------|--|--|
| <p>movement on the other side and sit down after.</p> <ul style="list-style-type: none"> <li>• Aim for 1 minute.</li> </ul> |  |  |
|-----------------------------------------------------------------------------------------------------------------------------|--|--|

|                                                                                                                                                                                                                                                                                                                                                   |                                                                                    |                                                                                      |
|---------------------------------------------------------------------------------------------------------------------------------------------------------------------------------------------------------------------------------------------------------------------------------------------------------------------------------------------------|------------------------------------------------------------------------------------|--------------------------------------------------------------------------------------|
| <p><b>4.</b></p> <ul style="list-style-type: none"> <li>• Progress to this level when you are able to achieve at least 15 repetitions of level 3 in 1 minute.</li> <li>• Continue sit-to-stand transfers, but this time, tip-toe up when you arrive in a standing position.</li> <li>• Aim for 1 minute and incrementally add weights.</li> </ul> | 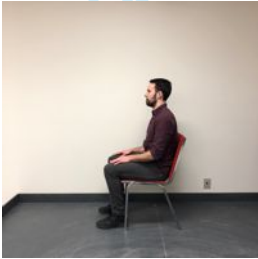 |  |
|---------------------------------------------------------------------------------------------------------------------------------------------------------------------------------------------------------------------------------------------------------------------------------------------------------------------------------------------------|------------------------------------------------------------------------------------|--------------------------------------------------------------------------------------|

**B) Exercise 2 : Upper limbs**

|                                                                                                                  |                                                                                     |                                                                                      |
|------------------------------------------------------------------------------------------------------------------|-------------------------------------------------------------------------------------|--------------------------------------------------------------------------------------|
| <p><b>1.</b></p> <ul style="list-style-type: none"> <li>• Without weight in the hands, bend the trunk</li> </ul> |  |  |
|------------------------------------------------------------------------------------------------------------------|-------------------------------------------------------------------------------------|--------------------------------------------------------------------------------------|

|                                                                                                                                                                                                                                                                                                                                                                                                                                                                                                                                                                         |                                                                                     |                                                                                      |
|-------------------------------------------------------------------------------------------------------------------------------------------------------------------------------------------------------------------------------------------------------------------------------------------------------------------------------------------------------------------------------------------------------------------------------------------------------------------------------------------------------------------------------------------------------------------------|-------------------------------------------------------------------------------------|--------------------------------------------------------------------------------------|
| <p>1<br/>2<br/>3<br/>4<br/>5<br/>6<br/>7<br/>8<br/>9<br/>10<br/>11<br/>12<br/>13<br/>14<br/>15<br/>16<br/>17<br/>18<br/>19<br/>20<br/>21<br/>22</p> <p>slightly to touch the top of a chair and raise your arms at shoulder height.</p> <ul style="list-style-type: none"> <li>• Movement should be slow and until you feel tired or in pain (3/10).</li> </ul>                                                                                                                                                                                                         |                                                                                     |                                                                                      |
| <p>23<br/>24<br/>25<br/>26<br/>27<br/>28<br/>29<br/>30<br/>31<br/>32<br/>33<br/>34<br/>35<br/>36<br/>37<br/>38<br/>39<br/>40<br/>41<br/>42<br/>43<br/>44<br/>45<br/>46<br/>47<br/>48<br/>49<br/>50<br/>51<br/>52<br/>53<br/>54<br/>55<br/>56<br/>57<br/>58<br/>59<br/>60</p> <p>2.</p> <ul style="list-style-type: none"> <li>• Start when you are able to perform at least 15 consecutive level 1 repetitions.</li> <li>• Still without weight in your hands, bend further to touch the chair seat and raise your arms even higher than the previous level.</li> </ul> |  |  |

|                                                                                                                                                                                                                                                                                                                                                              |                                                                                     |                                                                                       |
|--------------------------------------------------------------------------------------------------------------------------------------------------------------------------------------------------------------------------------------------------------------------------------------------------------------------------------------------------------------|-------------------------------------------------------------------------------------|---------------------------------------------------------------------------------------|
| <ul style="list-style-type: none"> <li>• Movement should be slow and until you feel tired or in pain (3/10).</li> </ul>                                                                                                                                                                                                                                      |                                                                                     |                                                                                       |
| <p><b>3.</b></p> <ul style="list-style-type: none"> <li>• Start when you are able to perform at least 15 consecutive level 2 repetitions.</li> <li>• Still without weight in your hands, bend further to touch the ground and raise your arms as high as possible.</li> <li>• Movement should be slow and until you feel tired or in pain (3/10).</li> </ul> | 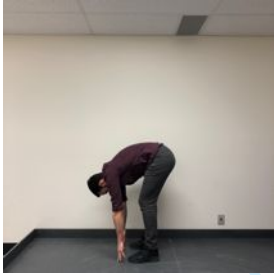  |   |
| <p><b>4.</b></p> <ul style="list-style-type: none"> <li>• Start when you are able to perform at least 15</li> </ul>                                                                                                                                                                                                                                          |  |  |

1  
2  
3  
4  
5  
6  
7  
8  
9  
10  
11  
12  
13  
14  
15  
16  
17  
18  
19  
20  
21  
22  
23  
24  
25  
26  
27  
28  
29  
30  
31  
32  
33  
34  
35  
36  
37  
38  
39  
40  
41  
42  
43  
44  
45  
46  
47  
48  
49  
50  
51  
52  
53  
54  
55  
56  
57  
58  
59  
60

1  
2  
3  
4  
5  
6  
7  
8  
9  
10  
11  
12  
13  
14  
15  
16  
17  
18  
19  
20  
21  
22  
23  
24  
25  
26  
27  
28  
29  
30  
31  
32  
33  
34  
35  
36  
37  
38  
39  
40  
41  
42  
43  
44  
45  
46  
47  
48  
49  
50  
51  
52  
53  
54  
55  
56  
57  
58  
59  
60

|                                                                                                                                                                              |  |  |
|------------------------------------------------------------------------------------------------------------------------------------------------------------------------------|--|--|
| <p>consecutive level 3 repetitions.</p> <ul style="list-style-type: none"> <li>• Bend to pick-up a light weight from the ground and raise it as high as possible.</li> </ul> |  |  |
|------------------------------------------------------------------------------------------------------------------------------------------------------------------------------|--|--|

|                                                                                                                                                                                              |                                 |
|----------------------------------------------------------------------------------------------------------------------------------------------------------------------------------------------|---------------------------------|
| <p>5.</p> <ul style="list-style-type: none"> <li>• Start when you are able to perform at least 15 consecutive level 3 repetitions.</li> <li>• Progressively lift heavier weights.</li> </ul> | <p>Same pictures as level 4</p> |
|----------------------------------------------------------------------------------------------------------------------------------------------------------------------------------------------|---------------------------------|

**C) Exercise 3 : Arm elevation in 3 different planes**

|                                                                          |                                                                                      |  |
|--------------------------------------------------------------------------|--------------------------------------------------------------------------------------|--|
| <p><b>C1. Flexion</b><br/>(starting with a short lever if necessary)</p> |  |  |
|--------------------------------------------------------------------------|--------------------------------------------------------------------------------------|--|

|                                                                                                                                                                                                                                                                                                                                                                                                                     |                                                                                      |
|---------------------------------------------------------------------------------------------------------------------------------------------------------------------------------------------------------------------------------------------------------------------------------------------------------------------------------------------------------------------------------------------------------------------|--------------------------------------------------------------------------------------|
| <p><b>C2. Scaption</b><br/>(starting with a short lever if necessary)</p>                                                                                                                                                                                                                                                                                                                                           | 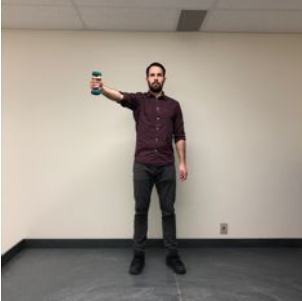   |
| <p><b>C3. Abduction</b><br/>(starting with a short lever if necessary)</p>                                                                                                                                                                                                                                                                                                                                          |    |
| <p><b>D) Pushing</b></p>                                                                                                                                                                                                                                                                                                                                                                                            |                                                                                      |
| <p><b>1. Wall push up</b></p> <ul style="list-style-type: none"> <li>• Standing, hands resting on the wall, arms a little narrower than the shoulders at an angle of about 45 degrees. Tighten the abdominals, tuck in the chin. Do not lift your shoulders.</li> <li>• Push against the wall, pushing apart the shoulder blades (round the back), imagining that someone is pushing you on the sternum.</li> </ul> |  |
| <p><b>2. Push up on knees</b></p> <ul style="list-style-type: none"> <li>• Place your hands slightly greater than shoulder-</li> </ul>                                                                                                                                                                                                                                                                              |  |

|                                                                                                                                                                                                                                                                                                                                                            |                                                                                      |
|------------------------------------------------------------------------------------------------------------------------------------------------------------------------------------------------------------------------------------------------------------------------------------------------------------------------------------------------------------|--------------------------------------------------------------------------------------|
| <p>width apart and your knees comfortably apart. Tighten the abdominals, tuck in the chin.</p> <ul style="list-style-type: none"> <li>• Slowly bend your elbows and lower your chest until your elbows are flexed 90°, then slowly return to the starting position.</li> </ul>                                                                             |                                                                                      |
| <p><b>3. Push up</b></p> <ul style="list-style-type: none"> <li>• Place your hands slightly greater than shoulder-width apart and your feet comfortably apart. Tighten the abdominals, tuck in the chin.</li> <li>• Slowly bend your elbows and lower your chest until your elbows are flexed 90°, then slowly return to the starting position.</li> </ul> |   |
| <p><b>E) Pulling</b></p>                                                                                                                                                                                                                                                                                                                                   |                                                                                      |
| <p><b>1. Rowing at shoulder height</b></p> <ul style="list-style-type: none"> <li>• Tie an elastic band in front of you at shoulder height.</li> <li>• Pull the elastic until your elbows are level with your</li> </ul>                                                                                                                                   |  |

|                                                                                                                                                                                                                                          |                                                                                      |
|------------------------------------------------------------------------------------------------------------------------------------------------------------------------------------------------------------------------------------------|--------------------------------------------------------------------------------------|
| <p>trunk while keeping your hands parallel to the ground. Keep your trunk right, tighten your abdominals and tuck you chin.</p>                                                                                                          |                                                                                      |
| <p><b>2. Rowing + ER</b></p> <ul style="list-style-type: none"> <li>• Perform level 1.</li> <li>• Once in position, rotate your arm in order to bring your hands backwards.</li> </ul>                                                   |    |
| <p><b>3. Rowing + ER + elbow extension (+squat)</b></p> <ul style="list-style-type: none"> <li>• Perform level 2.</li> <li>• Once in position, extend your elbows and lift your hands as high as possible.</li> </ul>                    |   |
| <p><b>G) Carrying</b></p>                                                                                                                                                                                                                |                                                                                      |
| <p><b>1. Walking while carrying a weight</b></p> <ul style="list-style-type: none"> <li>• Pick up a weight with your hand and walk for 5 meters while keeping your trunk right. Walk back with the weight in your other hand.</li> </ul> |  |
| <p><b>H) Throwing</b></p>                                                                                                                                                                                                                |                                                                                      |
| <p><b>1. Simple throwing motion with rubber band</b></p> <ul style="list-style-type: none"> <li>• Tie a rubber band to the top of a door.</li> </ul>                                                                                     |  |



|                                                                                                                                                                                                                                                                                                                                                                                                                      |                                                                                      |  |
|----------------------------------------------------------------------------------------------------------------------------------------------------------------------------------------------------------------------------------------------------------------------------------------------------------------------------------------------------------------------------------------------------------------------|--------------------------------------------------------------------------------------|--|
| <p>1</p> <p>2</p> <p>3</p> <p>4</p> <p>5</p> <p>6</p> <p>7</p> <p>8</p> <p>9</p> <p>10</p> <p>11</p> <p>12</p> <p>13</p> <p>14</p> <p>15</p> <p>16</p> <ul style="list-style-type: none"> <li>• Take the rubber band in your hand and turn your back to the door.</li> <li>• Bring your arm forward as if you were throwing an object. Keep your trunk right, tighten your abdominals and tuck your chin.</li> </ul> |                                                                                      |  |
| <p>17</p> <p>18</p> <p>19</p> <p>20</p> <p>21</p> <p>22</p> <p>23</p> <p>24</p> <p>25</p> <p>26</p> <p>27</p> <p><b>2. Simple throwing motion with rubber band + shoulder protraction</b></p> <ul style="list-style-type: none"> <li>• Same as level 1 but bring your shoulder forward at the end of the movement.</li> </ul>                                                                                        | 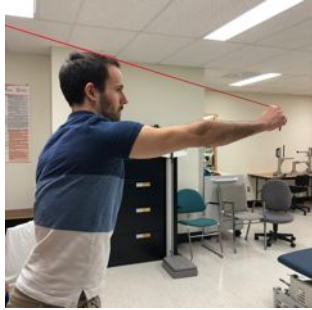   |  |
| <p>28</p> <p>29</p> <p>30</p> <p>31</p> <p>32</p> <p>33</p> <p>34</p> <p>35</p> <p>36</p> <p>37</p> <p>38</p> <p>39</p> <p>40</p> <p>41</p> <p>42</p> <p><b>3. Simple throwing motion with rubber band + trunk rotation</b></p> <ul style="list-style-type: none"> <li>• Same as level 2 but add a trunk rotation to the opposite side of your throwing hand.</li> </ul>                                             |   |  |
| <p>43</p> <p>44</p> <p><b>I) Precision</b></p>                                                                                                                                                                                                                                                                                                                                                                       |                                                                                      |  |
| <p>45</p> <p>46</p> <p>47</p> <p>48</p> <p>49</p> <p>50</p> <p>51</p> <p>52</p> <p>53</p> <p>54</p> <p>55</p> <p>56</p> <p>57</p> <p>58</p> <p>59</p> <p>60</p> <p><b>1. Drawing the alphabet on the wall with a ball</b></p> <ul style="list-style-type: none"> <li>• Slowly draw the letters of the alphabet on a wall using a rolling ball.</li> </ul>                                                            |  |  |

- |                                                                                                               |  |
|---------------------------------------------------------------------------------------------------------------|--|
| <ul style="list-style-type: none"><li>• As you progress, try to draw letters as little as possible.</li></ul> |  |
|---------------------------------------------------------------------------------------------------------------|--|

For peer review only

**BMJ**

## Consent form

**For a patient's consent to publication of images and/or information about them in BMJ publications.**

Name of patient: \_\_\_\_\_ *Marc-Olivier Dubé* \_\_\_\_\_

Relationship to patient (if patient not signing this form): \_\_\_\_\_

Description of the photo, image, text or other material (**Material**) about the patient. **A copy of the Material must be attached to this form:** \_\_\_\_\_ *Photos for exercise program* \_\_\_\_\_

Provisional title of article in which Material will be included: *Rotator cuff related shoulder pain: Does the type of exercise influence the outcomes – Protocol of a randomized controlled trial*

---

### CONSENT

I \_\_\_\_\_ *Marc-Olivier Dubé* \_\_\_\_\_ [PRINT FULL NAME] give my consent for the Material about me/the patient to appear in a BMJ publication.

**I confirm that I:** (please tick boxes to confirm)

**have seen the photo, image, text or other material about me/the patient**

**have read the article to be submitted to BMJ**  **am legally entitled to give this consent.**

I understand the following:

- (1) The Material will be published without my/the patient's name attached, however I understand that complete anonymity cannot be guaranteed. It is possible that somebody somewhere - for example, somebody who looked after me/the patient or a relative - may recognise me/the patient.
- (2) The Material may show or include details of my/the patient's medical condition or injury and any prognosis, treatment or surgery that I have/the patient has, had or may have in the future.
- (3) The article may be published in a journal which is distributed worldwide. BMJ's publications go mainly to doctors and other healthcare professionals but are also seen by many others including academics, students and journalists.
- (4) The article, including the Material, may be the subject of a press release, and may be linked to from social media and/or used in other promotional activities. Once published, the article will be placed on a BMJ website and may also be available on other websites.

(5) The text of the article will be edited for style, grammar and consistency before publication.

(6) I/the patient will not receive any financial benefit from publication of the article.

(7) The article may also be used in full or in part in other publications and products published by BMJ and/or by other publishers. This includes publication in English and in translation, in print, in digital formats, and in any other formats that may be used by BMJ or other publishers now and in the future. The article may appear in local editions of journals or other publications, published in the UK and overseas.

(8) I can revoke my consent at any time before publication, but once the article has been committed to publication ("gone to press") it will not be possible to revoke the consent.

(9) This consent form will be retained securely and in confidence by BMJ in accordance with the law, for no longer than necessary. Personal data provided in this form will be used and retained in accordance with BMJ's Privacy Policy available at <https://www.bmj.com/company/your-privacy/>.

Please tick box to confirm the following:

- Where this consent relates to an article in *BMJ Case Reports*, I have/the patient has had the opportunity to comment on the article and I am satisfied that the comments, if any, have been reflected in the article.

Signed: Marc-Olivier Dubé

Print name: Marc-Olivier Dubé

Address: 2507-2818 Boulevard Laurier  
marcolivier.dub@gmail.com

Email address:

G1V0E2 Quebec (Qc), Canada

Telephone no: 418-906-2071

If signing on behalf of the patient, please give the reason why the patient can't consent for themselves (e.g. patient is under 18 or has cognitive or intellectual impairment).

Date:

- If you are signing for a family or other group, please tick the box to confirm that all relevant members of the family or group have been informed.

1  
2  
3 **Details of person who has explained and administered the form** to the patient or  
4 their representative (e.g. the corresponding author or other person who has the  
5 authority to obtain consent).

6 Signed: Marc-Olivier Dubé

Print name: Marc-Olivier Dubé

8  
9 Position: PhD candidate (student)

Address:

11 Institution: Université Laval

12 525, boul. Wilfrid-Hamel, Office H-1300

13 Québec (Québec) G1M 2S8

14 Email address: marc-  
15 olivier.dube.1@ulaval.ca

Telephone no: 418-906-2071

16 Date: May 1, 2020

Patient consent form 050419

**Supplementary file 3: Information about pain given to both exercise groups**

|   |                                                                                                                                                                                                                                                                                                                                                                       |
|---|-----------------------------------------------------------------------------------------------------------------------------------------------------------------------------------------------------------------------------------------------------------------------------------------------------------------------------------------------------------------------|
| 1 | Feeling pain in the shoulder is permissible and even encouraged during the exercise program. Any level of pain is permissible as long as it is tolerable for the individual, and, that there is no increase or exacerbation in pain in the evening and the following day.                                                                                             |
| 2 | If more guidance as to the amount of pain is required then the participant can perform the exercises in pain with a subjective level of pain between 1 to 3 on a 10-point pain scale, where 0 represents no pain and 10, worst imaginable pain. If this level of pain does not produce an improvement in exercise tolerance, higher levels of pain may be encouraged. |
| 3 | Participants will be informed that if increased pain is experienced in the evening or the following day and if this pain is not acceptable for the individual then the number of repetitions per set, number of sets, amount of weight should be reduced accordingly.                                                                                                 |
| 4 | If there is no exacerbation of pain and the participant perceives that the amount of weight and number of repetitions are being performed at a moderate intensity (on a scale ranging from: no exertion/ easy, mild, moderate, hard, impossible), then heavier weights, or more repetitions may be incrementally used.                                                |

# Reporting checklist for protocol of a clinical trial.

Based on the SPIRIT guidelines.

## Instructions to authors

Complete this checklist by entering the page numbers from your manuscript where readers will find each of the items listed below.

Your article may not currently address all the items on the checklist. Please modify your text to include the missing information. If you are certain that an item does not apply, please write "n/a" and provide a short explanation.

Upload your completed checklist as an extra file when you submit to a journal.

In your methods section, say that you used the SPIRIT reporting guidelines, and cite them as:

Chan A-W, Tetzlaff JM, Altman DG, Laupacis A, Gøtzsche PC, Krleža-Jerić K, Hróbjartsson A, Mann H, Dickersin K, Berlin J, Doré C, Parulekar W, Summerskill W, Groves T, Schulz K, Sox H, Rockhold FW, Rennie D, Moher D. SPIRIT 2013 Statement: Defining standard protocol items for clinical trials. *Ann Intern Med.* 2013;158(3):200-207

|                                             |                     | Reporting Item                                                                                               | Page Number |
|---------------------------------------------|---------------------|--------------------------------------------------------------------------------------------------------------|-------------|
| <b>Administrative information</b>           |                     |                                                                                                              |             |
| Title                                       | <a href="#">#1</a>  | Descriptive title identifying the study design, population, interventions, and, if applicable, trial acronym | 1           |
| Trial registration                          | <a href="#">#2a</a> | Trial identifier and registry name. If not yet registered, name of intended registry                         | 2           |
| Trial registration: data set                | <a href="#">#2b</a> | All items from the World Health Organization Trial Registration Data Set                                     | n/a no data |
| Protocol version                            | <a href="#">#3</a>  | Date and version identifier                                                                                  | 1           |
| Funding                                     | <a href="#">#4</a>  | Sources and types of financial, material, and other support                                                  | 13          |
| Roles and responsibilities: contributorship | <a href="#">#5a</a> | Names, affiliations, and roles of protocol contributors                                                      | 1 and 13    |

|    |                           |                     |                                                                   |          |
|----|---------------------------|---------------------|-------------------------------------------------------------------|----------|
| 1  | Roles and                 | <a href="#">#5b</a> | Name and contact information for the trial sponsor                | n/a no   |
| 2  | responsibilities:         |                     |                                                                   | trial    |
| 3  | sponsor contact           |                     |                                                                   | sponsor  |
| 4  | information               |                     |                                                                   |          |
| 5  |                           |                     |                                                                   |          |
| 6  |                           |                     |                                                                   |          |
| 7  |                           |                     |                                                                   |          |
| 8  | Roles and                 | <a href="#">#5c</a> | Role of study sponsor and funders, if any, in study design;       | n/a none |
| 9  | responsibilities:         |                     | collection, management, analysis, and interpretation of data;     |          |
| 10 | sponsor and funder        |                     | writing of the report; and the decision to submit the report for  |          |
| 11 |                           |                     | publication, including whether they will have ultimate authority  |          |
| 12 |                           |                     | over any of these activities                                      |          |
| 13 |                           |                     |                                                                   |          |
| 14 |                           |                     |                                                                   |          |
| 15 |                           |                     |                                                                   |          |
| 16 | Roles and                 | <a href="#">#5d</a> | Composition, roles, and responsibilities of the coordinating      | n/a none |
| 17 | responsibilities:         |                     | centre, steering committee, endpoint adjudication committee,      |          |
| 18 | committees                |                     | data management team, and other individuals or groups             |          |
| 19 |                           |                     | overseeing the trial, if applicable (see Item 21a for data        |          |
| 20 |                           |                     | monitoring committee)                                             |          |
| 21 |                           |                     |                                                                   |          |
| 22 |                           |                     |                                                                   |          |
| 23 |                           |                     |                                                                   |          |
| 24 | <b>Introduction</b>       |                     |                                                                   |          |
| 25 |                           |                     |                                                                   |          |
| 26 | Background and            | <a href="#">#6a</a> | Description of research question and justification for            | 3        |
| 27 | rationale                 |                     | undertaking the trial, including summary of relevant studies      |          |
| 28 |                           |                     | (published and unpublished) examining benefits and harms for      |          |
| 29 |                           |                     | each intervention                                                 |          |
| 30 |                           |                     |                                                                   |          |
| 31 |                           |                     |                                                                   |          |
| 32 |                           |                     |                                                                   |          |
| 33 | Background and            | <a href="#">#6b</a> | Explanation for choice of comparators                             | 3        |
| 34 | rationale: choice of      |                     |                                                                   |          |
| 35 | comparators               |                     |                                                                   |          |
| 36 |                           |                     |                                                                   |          |
| 37 |                           |                     |                                                                   |          |
| 38 | Objectives                | <a href="#">#7</a>  | Specific objectives or hypotheses                                 | 3 and 4  |
| 39 |                           |                     |                                                                   |          |
| 40 |                           |                     |                                                                   |          |
| 41 | Trial design              | <a href="#">#8</a>  | Description of trial design including type of trial (eg, parallel | 4        |
| 42 |                           |                     | group, crossover, factorial, single group), allocation ratio, and |          |
| 43 |                           |                     | framework (eg, superiority, equivalence, non-inferiority,         |          |
| 44 |                           |                     | exploratory)                                                      |          |
| 45 |                           |                     |                                                                   |          |
| 46 |                           |                     |                                                                   |          |
| 47 |                           |                     |                                                                   |          |
| 48 | <b>Methods:</b>           |                     |                                                                   |          |
| 49 | <b>Participants,</b>      |                     |                                                                   |          |
| 50 | <b>interventions, and</b> |                     |                                                                   |          |
| 51 | <b>outcomes</b>           |                     |                                                                   |          |
| 52 |                           |                     |                                                                   |          |
| 53 |                           |                     |                                                                   |          |
| 54 |                           |                     |                                                                   |          |
| 55 | Study setting             | <a href="#">#9</a>  | Description of study settings (eg, community clinic, academic     | 4        |
| 56 |                           |                     | hospital) and list of countries where data will be collected.     |          |
| 57 |                           |                     | Reference to where list of study sites can be obtained            |          |
| 58 |                           |                     |                                                                   |          |
| 59 |                           |                     |                                                                   |          |
| 60 |                           |                     |                                                                   |          |



|    |                              |                      |                                                                                                                                                                                                                                                                                                                                                                                |                 |
|----|------------------------------|----------------------|--------------------------------------------------------------------------------------------------------------------------------------------------------------------------------------------------------------------------------------------------------------------------------------------------------------------------------------------------------------------------------|-----------------|
| 1  | Eligibility criteria         | <a href="#">#10</a>  | Inclusion and exclusion criteria for participants. If applicable, eligibility criteria for study centres and individuals who will perform the interventions (eg, surgeons, psychotherapists)                                                                                                                                                                                   | 4               |
| 2  |                              |                      |                                                                                                                                                                                                                                                                                                                                                                                |                 |
| 3  |                              |                      |                                                                                                                                                                                                                                                                                                                                                                                |                 |
| 4  |                              |                      |                                                                                                                                                                                                                                                                                                                                                                                |                 |
| 5  |                              |                      |                                                                                                                                                                                                                                                                                                                                                                                |                 |
| 6  | Interventions:               | <a href="#">#11a</a> | Interventions for each group with sufficient detail to allow replication, including how and when they will be administered                                                                                                                                                                                                                                                     | 5 and 6         |
| 7  | description                  |                      |                                                                                                                                                                                                                                                                                                                                                                                |                 |
| 8  |                              |                      |                                                                                                                                                                                                                                                                                                                                                                                |                 |
| 9  |                              |                      |                                                                                                                                                                                                                                                                                                                                                                                |                 |
| 10 | Interventions:               | <a href="#">#11b</a> | Criteria for discontinuing or modifying allocated interventions for a given trial participant (eg, drug dose change in response to harms, participant request, or improving / worsening disease)                                                                                                                                                                               | 5 and 6         |
| 11 | modifications                |                      |                                                                                                                                                                                                                                                                                                                                                                                |                 |
| 12 |                              |                      |                                                                                                                                                                                                                                                                                                                                                                                |                 |
| 13 |                              |                      |                                                                                                                                                                                                                                                                                                                                                                                |                 |
| 14 |                              |                      |                                                                                                                                                                                                                                                                                                                                                                                |                 |
| 15 | Interventions:               | <a href="#">#11c</a> | Strategies to improve adherence to intervention protocols, and any procedures for monitoring adherence (eg, drug tablet return; laboratory tests)                                                                                                                                                                                                                              | 5 and 6         |
| 16 | adherence                    |                      |                                                                                                                                                                                                                                                                                                                                                                                |                 |
| 17 |                              |                      |                                                                                                                                                                                                                                                                                                                                                                                |                 |
| 18 |                              |                      |                                                                                                                                                                                                                                                                                                                                                                                |                 |
| 19 |                              |                      |                                                                                                                                                                                                                                                                                                                                                                                |                 |
| 20 |                              |                      |                                                                                                                                                                                                                                                                                                                                                                                |                 |
| 21 | Interventions:               | <a href="#">#11d</a> | Relevant concomitant care and interventions that are permitted or prohibited during the trial                                                                                                                                                                                                                                                                                  | n/a             |
| 22 | concomitant care             |                      |                                                                                                                                                                                                                                                                                                                                                                                |                 |
| 23 |                              |                      |                                                                                                                                                                                                                                                                                                                                                                                |                 |
| 24 |                              |                      |                                                                                                                                                                                                                                                                                                                                                                                |                 |
| 25 | Outcomes                     | <a href="#">#12</a>  | Primary, secondary, and other outcomes, including the specific measurement variable (eg, systolic blood pressure), analysis metric (eg, change from baseline, final value, time to event), method of aggregation (eg, median, proportion), and time point for each outcome. Explanation of the clinical relevance of chosen efficacy and harm outcomes is strongly recommended | 6 and 7         |
| 26 |                              |                      |                                                                                                                                                                                                                                                                                                                                                                                |                 |
| 27 |                              |                      |                                                                                                                                                                                                                                                                                                                                                                                |                 |
| 28 |                              |                      |                                                                                                                                                                                                                                                                                                                                                                                |                 |
| 29 |                              |                      |                                                                                                                                                                                                                                                                                                                                                                                |                 |
| 30 |                              |                      |                                                                                                                                                                                                                                                                                                                                                                                |                 |
| 31 |                              |                      |                                                                                                                                                                                                                                                                                                                                                                                |                 |
| 32 |                              |                      |                                                                                                                                                                                                                                                                                                                                                                                |                 |
| 33 |                              |                      |                                                                                                                                                                                                                                                                                                                                                                                |                 |
| 34 | Participant timeline         | <a href="#">#13</a>  | Time schedule of enrolment, interventions (including any run-ins and washouts), assessments, and visits for participants. A schematic diagram is highly recommended (see Figure)                                                                                                                                                                                               | 4 + figure<br>1 |
| 35 |                              |                      |                                                                                                                                                                                                                                                                                                                                                                                |                 |
| 36 |                              |                      |                                                                                                                                                                                                                                                                                                                                                                                |                 |
| 37 |                              |                      |                                                                                                                                                                                                                                                                                                                                                                                |                 |
| 38 |                              |                      |                                                                                                                                                                                                                                                                                                                                                                                |                 |
| 39 |                              |                      |                                                                                                                                                                                                                                                                                                                                                                                |                 |
| 40 | Sample size                  | <a href="#">#14</a>  | Estimated number of participants needed to achieve study objectives and how it was determined, including clinical and statistical assumptions supporting any sample size calculations                                                                                                                                                                                          | 4 and 5         |
| 41 |                              |                      |                                                                                                                                                                                                                                                                                                                                                                                |                 |
| 42 |                              |                      |                                                                                                                                                                                                                                                                                                                                                                                |                 |
| 43 |                              |                      |                                                                                                                                                                                                                                                                                                                                                                                |                 |
| 44 |                              |                      |                                                                                                                                                                                                                                                                                                                                                                                |                 |
| 45 | Recruitment                  | <a href="#">#15</a>  | Strategies for achieving adequate participant enrolment to reach target sample size                                                                                                                                                                                                                                                                                            | 4 and 5         |
| 46 |                              |                      |                                                                                                                                                                                                                                                                                                                                                                                |                 |
| 47 |                              |                      |                                                                                                                                                                                                                                                                                                                                                                                |                 |
| 48 |                              |                      |                                                                                                                                                                                                                                                                                                                                                                                |                 |
| 49 | <b>Methods: Assignment</b>   |                      |                                                                                                                                                                                                                                                                                                                                                                                |                 |
| 50 | <b>of interventions (for</b> |                      |                                                                                                                                                                                                                                                                                                                                                                                |                 |
| 51 | <b>controlled trials)</b>    |                      |                                                                                                                                                                                                                                                                                                                                                                                |                 |
| 52 |                              |                      |                                                                                                                                                                                                                                                                                                                                                                                |                 |
| 53 |                              |                      |                                                                                                                                                                                                                                                                                                                                                                                |                 |
| 54 | Allocation: sequence         | <a href="#">#16a</a> | Method of generating the allocation sequence (eg, computer-generated random numbers), and list of any factors for stratification. To reduce predictability of a random sequence, details of any planned restriction (eg, blocking) should be                                                                                                                                   | 5               |
| 55 | generation                   |                      |                                                                                                                                                                                                                                                                                                                                                                                |                 |
| 56 |                              |                      |                                                                                                                                                                                                                                                                                                                                                                                |                 |
| 57 |                              |                      |                                                                                                                                                                                                                                                                                                                                                                                |                 |
| 58 |                              |                      |                                                                                                                                                                                                                                                                                                                                                                                |                 |
| 59 |                              |                      |                                                                                                                                                                                                                                                                                                                                                                                |                 |
| 60 |                              |                      |                                                                                                                                                                                                                                                                                                                                                                                |                 |

provided in a separate document that is unavailable to those who enrol participants or assign interventions

|    |                        |                      |                                                                     |
|----|------------------------|----------------------|---------------------------------------------------------------------|
| 1  |                        |                      |                                                                     |
| 2  |                        |                      |                                                                     |
| 3  |                        |                      |                                                                     |
| 4  | Allocation             | <a href="#">#16b</a> | Mechanism of implementing the allocation sequence (eg, central      |
| 5  | concealment            |                      | telephone; sequentially numbered, opaque, sealed envelopes),        |
| 6  |                        |                      | describing any steps to conceal the sequence until interventions    |
| 7  | mechanism              |                      | are assigned                                                        |
| 8  |                        |                      |                                                                     |
| 9  |                        |                      |                                                                     |
| 10 |                        |                      |                                                                     |
| 11 | Allocation:            | <a href="#">#16c</a> | Who will generate the allocation sequence, who will enrol           |
| 12 | implementation         |                      | participants, and who will assign participants to interventions     |
| 13 |                        |                      |                                                                     |
| 14 |                        |                      |                                                                     |
| 15 | Blinding (masking)     | <a href="#">#17a</a> | Who will be blinded after assignment to interventions (eg, trial    |
| 16 |                        |                      | participants, care providers, outcome assessors, data analysts),    |
| 17 |                        |                      | and how                                                             |
| 18 |                        |                      |                                                                     |
| 19 |                        |                      |                                                                     |
| 20 | Blinding (masking):    | <a href="#">#17b</a> | If blinded, circumstances under which unblinding is permissible,    |
| 21 | emergency unblinding   |                      | and procedure for revealing a participant's allocated intervention  |
| 22 |                        |                      | during the trial                                                    |
| 23 |                        |                      |                                                                     |
| 24 |                        |                      |                                                                     |
| 25 | <b>Methods: Data</b>   |                      |                                                                     |
| 26 | <b>collection,</b>     |                      |                                                                     |
| 27 | <b>management, and</b> |                      |                                                                     |
| 28 | <b>analysis</b>        |                      |                                                                     |
| 29 |                        |                      |                                                                     |
| 30 |                        |                      |                                                                     |
| 31 |                        |                      |                                                                     |
| 32 | Data collection plan   | <a href="#">#18a</a> | Plans for assessment and collection of outcome, baseline, and       |
| 33 |                        |                      | other trial data, including any related processes to promote data   |
| 34 |                        |                      | quality (eg, duplicate measurements, training of assessors) and a   |
| 35 |                        |                      | description of study instruments (eg, questionnaires, laboratory    |
| 36 |                        |                      | tests) along with their reliability and validity, if known.         |
| 37 |                        |                      | Reference to where data collection forms can be found, if not in    |
| 38 |                        |                      | the protocol                                                        |
| 39 |                        |                      |                                                                     |
| 40 |                        |                      |                                                                     |
| 41 |                        |                      |                                                                     |
| 42 |                        |                      |                                                                     |
| 43 | Data collection plan:  | <a href="#">#18b</a> | Plans to promote participant retention and complete follow-up,      |
| 44 | retention              |                      | including list of any outcome data to be collected for participants |
| 45 |                        |                      | who discontinue or deviate from intervention protocols              |
| 46 |                        |                      |                                                                     |
| 47 |                        |                      |                                                                     |
| 48 |                        |                      |                                                                     |
| 49 | Data management        | <a href="#">#19</a>  | Plans for data entry, coding, security, and storage, including any  |
| 50 |                        |                      | related processes to promote data quality (eg, double data entry;   |
| 51 |                        |                      | range checks for data values). Reference to where details of data   |
| 52 |                        |                      | management procedures can be found, if not in the protocol          |
| 53 |                        |                      |                                                                     |
| 54 |                        |                      |                                                                     |
| 55 | Statistics: outcomes   | <a href="#">#20a</a> | Statistical methods for analysing primary and secondary             |
| 56 |                        |                      | outcomes. Reference to where other details of the statistical       |
| 57 |                        |                      | analysis plan can be found, if not in the protocol                  |
| 58 |                        |                      |                                                                     |
| 59 |                        |                      |                                                                     |
| 60 |                        |                      |                                                                     |

|    |                            |                      |                                                                    |     |
|----|----------------------------|----------------------|--------------------------------------------------------------------|-----|
| 1  | Statistics: additional     | <a href="#">#20b</a> | Methods for any additional analyses (eg, subgroup and adjusted     | 7   |
| 2  | analyses                   |                      | analyses)                                                          |     |
| 3  |                            |                      |                                                                    |     |
| 4  | Statistics: analysis       | <a href="#">#20c</a> | Definition of analysis population relating to protocol non-        | 7   |
| 5  | population and missing     |                      | adherence (eg, as randomised analysis), and any statistical        |     |
| 6  | data                       |                      | methods to handle missing data (eg, multiple imputation)           |     |
| 7  |                            |                      |                                                                    |     |
| 8  |                            |                      |                                                                    |     |
| 9  |                            |                      |                                                                    |     |
| 10 | <b>Methods: Monitoring</b> |                      |                                                                    |     |
| 11 |                            |                      |                                                                    |     |
| 12 | Data monitoring:           | <a href="#">#21a</a> | Composition of data monitoring committee (DMC); summary of         | n/a |
| 13 | formal committee           |                      | its role and reporting structure; statement of whether it is       |     |
| 14 |                            |                      | independent from the sponsor and competing interests; and          |     |
| 15 |                            |                      | reference to where further details about its charter can be found, |     |
| 16 |                            |                      | if not in the protocol. Alternatively, an explanation of why a     |     |
| 17 |                            |                      | DMC is not needed                                                  |     |
| 18 |                            |                      |                                                                    |     |
| 19 |                            |                      |                                                                    |     |
| 20 |                            |                      |                                                                    |     |
| 21 |                            |                      |                                                                    |     |
| 22 | Data monitoring:           | <a href="#">#21b</a> | Description of any interim analyses and stopping guidelines,       | n/a |
| 23 | interim analysis           |                      | including who will have access to these interim results and make   |     |
| 24 |                            |                      | the final decision to terminate the trial                          |     |
| 25 |                            |                      |                                                                    |     |
| 26 |                            |                      |                                                                    |     |
| 27 | Harms                      | <a href="#">#22</a>  | Plans for collecting, assessing, reporting, and managing solicited | 7   |
| 28 |                            |                      | and spontaneously reported adverse events and other unintended     |     |
| 29 |                            |                      | effects of trial interventions or trial conduct                    |     |
| 30 |                            |                      |                                                                    |     |
| 31 |                            |                      |                                                                    |     |
| 32 |                            |                      |                                                                    |     |
| 33 | Auditing                   | <a href="#">#23</a>  | Frequency and procedures for auditing trial conduct, if any, and   | n/a |
| 34 |                            |                      | whether the process will be independent from investigators and     |     |
| 35 |                            |                      | the sponsor                                                        |     |
| 36 |                            |                      |                                                                    |     |
| 37 |                            |                      |                                                                    |     |
| 38 | <b>Ethics and</b>          |                      |                                                                    |     |
| 39 | <b>dissemination</b>       |                      |                                                                    |     |
| 40 |                            |                      |                                                                    |     |
| 41 |                            |                      |                                                                    |     |
| 42 | Research ethics            | <a href="#">#24</a>  | Plans for seeking research ethics committee / institutional review | 8   |
| 43 | approval                   |                      | board (REC / IRB) approval                                         |     |
| 44 |                            |                      |                                                                    |     |
| 45 |                            |                      |                                                                    |     |
| 46 | Protocol amendments        | <a href="#">#25</a>  | Plans for communicating important protocol modifications (eg,      | 8   |
| 47 |                            |                      | changes to eligibility criteria, outcomes, analyses) to relevant   |     |
| 48 |                            |                      | parties (eg, investigators, REC / IRBs, trial participants, trial  |     |
| 49 |                            |                      | registries, journals, regulators)                                  |     |
| 50 |                            |                      |                                                                    |     |
| 51 |                            |                      |                                                                    |     |
| 52 |                            |                      |                                                                    |     |
| 53 | Consent or assent          | <a href="#">#26a</a> | Who will obtain informed consent or assent from potential trial    | 8   |
| 54 |                            |                      | participants or authorised surrogates, and how (see Item 32)       |     |
| 55 |                            |                      |                                                                    |     |
| 56 |                            |                      |                                                                    |     |
| 57 |                            |                      |                                                                    |     |
| 58 |                            |                      |                                                                    |     |
| 59 |                            |                      |                                                                    |     |
| 60 |                            |                      |                                                                    |     |

|    |                          |                      |                                                                      |     |
|----|--------------------------|----------------------|----------------------------------------------------------------------|-----|
| 1  | Consent or assent:       | <a href="#">#26b</a> | Additional consent provisions for collection and use of              | n/a |
| 2  | ancillary studies        |                      | participant data and biological specimens in ancillary studies, if   |     |
| 3  |                          |                      | applicable                                                           |     |
| 4  |                          |                      |                                                                      |     |
| 5  |                          |                      |                                                                      |     |
| 6  | Confidentiality          | <a href="#">#27</a>  | How personal information about potential and enrolled                | 8   |
| 7  |                          |                      | participants will be collected, shared, and maintained in order to   |     |
| 8  |                          |                      | protect confidentiality before, during, and after the trial          |     |
| 9  |                          |                      |                                                                      |     |
| 10 |                          |                      |                                                                      |     |
| 11 | Declaration of interests | <a href="#">#28</a>  | Financial and other competing interests for principal                | 13  |
| 12 |                          |                      | investigators for the overall trial and each study site              |     |
| 13 |                          |                      |                                                                      |     |
| 14 |                          |                      |                                                                      |     |
| 15 | Data access              | <a href="#">#29</a>  | Statement of who will have access to the final trial dataset, and    | n/a |
| 16 |                          |                      | disclosure of contractual agreements that limit such access for      |     |
| 17 |                          |                      | investigators                                                        |     |
| 18 |                          |                      |                                                                      |     |
| 19 |                          |                      |                                                                      |     |
| 20 | Ancillary and post trial | <a href="#">#30</a>  | Provisions, if any, for ancillary and post-trial care, and for       | n/a |
| 21 | care                     |                      | compensation to those who suffer harm from trial participation       |     |
| 22 |                          |                      |                                                                      |     |
| 23 |                          |                      |                                                                      |     |
| 24 | Dissemination policy:    | <a href="#">#31a</a> | Plans for investigators and sponsor to communicate trial results     | 8   |
| 25 | trial results            |                      | to participants, healthcare professionals, the public, and other     |     |
| 26 |                          |                      | relevant groups (eg, via publication, reporting in results           |     |
| 27 |                          |                      | databases, or other data sharing arrangements), including any        |     |
| 28 |                          |                      | publication restrictions                                             |     |
| 29 |                          |                      |                                                                      |     |
| 30 |                          |                      |                                                                      |     |
| 31 |                          |                      |                                                                      |     |
| 32 |                          |                      |                                                                      |     |
| 33 | Dissemination policy:    | <a href="#">#31b</a> | Authorship eligibility guidelines and any intended use of            | n/a |
| 34 | authorship               |                      | professional writers                                                 |     |
| 35 |                          |                      |                                                                      |     |
| 36 |                          |                      |                                                                      |     |
| 37 | Dissemination policy:    | <a href="#">#31c</a> | Plans, if any, for granting public access to the full protocol,      | n/a |
| 38 | reproducible research    |                      | participant-level dataset, and statistical code                      |     |
| 39 |                          |                      |                                                                      |     |
| 40 |                          |                      |                                                                      |     |
| 41 | <b>Appendices</b>        |                      |                                                                      |     |
| 42 |                          |                      |                                                                      |     |
| 43 | Informed consent         | <a href="#">#32</a>  | Model consent form and other related documentation given to          | n/a |
| 44 | materials                |                      | participants and authorised surrogates                               |     |
| 45 |                          |                      |                                                                      |     |
| 46 |                          |                      |                                                                      |     |
| 47 | Biological specimens     | <a href="#">#33</a>  | Plans for collection, laboratory evaluation, and storage of          | n/a |
| 48 |                          |                      | biological specimens for genetic or molecular analysis in the        |     |
| 49 |                          |                      | current trial and for future use in ancillary studies, if applicable |     |
| 50 |                          |                      |                                                                      |     |
| 51 |                          |                      |                                                                      |     |

## Notes:

- 2b: n/a no data
- 5b: n/a no trial sponsor

- 13: 4 + figure 1 The SPIRIT checklist is distributed under the terms of the Creative Commons Attribution License CC-BY-ND 3.0. This checklist was completed on 30. April 2020 using <https://www.goodreports.org/>, a tool made by the [EQUATOR Network](#) in collaboration with [Penelope.ai](#)

For peer review only

# BMJ Open

## Rotator Cuff Related Shoulder Pain: Does The Type of Exercise Influence The Outcomes? – Protocol of a Randomized Controlled Trial

|                                 |                                                                                                                                                                                                                                                                                                                                                                                                                                                                                                                                                      |
|---------------------------------|------------------------------------------------------------------------------------------------------------------------------------------------------------------------------------------------------------------------------------------------------------------------------------------------------------------------------------------------------------------------------------------------------------------------------------------------------------------------------------------------------------------------------------------------------|
| Journal:                        | <i>BMJ Open</i>                                                                                                                                                                                                                                                                                                                                                                                                                                                                                                                                      |
| Manuscript ID                   | bmjopen-2020-039976.R1                                                                                                                                                                                                                                                                                                                                                                                                                                                                                                                               |
| Article Type:                   | Protocol                                                                                                                                                                                                                                                                                                                                                                                                                                                                                                                                             |
| Date Submitted by the Author:   | 22-Sep-2020                                                                                                                                                                                                                                                                                                                                                                                                                                                                                                                                          |
| Complete List of Authors:       | Dubé, Marc-Olivier; Université Laval Faculté de médecine, Rehabilitation; Center for Interdisciplinary Research in Rehabilitation and Social Integration<br>Desmeules, François; Université de Montréal Faculté de Médecine, Rehabilitation; Maisonneuve-Rosemont Hospital Research Centre<br>Lewis, Jeremy; University of Hertfordshire; Central London Community Healthcare NHS Trust<br>Roy, Jean-Sébastien; Université Laval Faculté de médecine, Rehabilitation; Center for Interdisciplinary Research in Rehabilitation and Social Integration |
| <b>Primary Subject Heading</b>: | Sports and exercise medicine                                                                                                                                                                                                                                                                                                                                                                                                                                                                                                                         |
| Secondary Subject Heading:      | Rehabilitation medicine                                                                                                                                                                                                                                                                                                                                                                                                                                                                                                                              |
| Keywords:                       | Elbow & shoulder < ORTHOPAEDIC & TRAUMA SURGERY, Musculoskeletal disorders < ORTHOPAEDIC & TRAUMA SURGERY, Shoulder < ORTHOPAEDIC & TRAUMA SURGERY, REHABILITATION MEDICINE, SPORTS MEDICINE                                                                                                                                                                                                                                                                                                                                                         |
|                                 |                                                                                                                                                                                                                                                                                                                                                                                                                                                                                                                                                      |

SCHOLARONE™  
Manuscripts



I, the Submitting Author has the right to grant and does grant on behalf of all authors of the Work (as defined in the below author licence), an exclusive licence and/or a non-exclusive licence for contributions from authors who are: i) UK Crown employees; ii) where BMJ has agreed a CC-BY licence shall apply, and/or iii) in accordance with the terms applicable for US Federal Government officers or employees acting as part of their official duties; on a worldwide, perpetual, irrevocable, royalty-free basis to BMJ Publishing Group Ltd ("BMJ") its licensees and where the relevant Journal is co-owned by BMJ to the co-owners of the Journal, to publish the Work in this journal and any other BMJ products and to exploit all rights, as set out in our [licence](#).

The Submitting Author accepts and understands that any supply made under these terms is made by BMJ to the Submitting Author unless you are acting as an employee on behalf of your employer or a postgraduate student of an affiliated institution which is paying any applicable article publishing charge ("APC") for Open Access articles. Where the Submitting Author wishes to make the Work available on an Open Access basis (and intends to pay the relevant APC), the terms of reuse of such Open Access shall be governed by a Creative Commons licence – details of these licences and which [Creative Commons](#) licence will apply to this Work are set out in our licence referred to above.

Other than as permitted in any relevant BMJ Author's Self Archiving Policies, I confirm this Work has not been accepted for publication elsewhere, is not being considered for publication elsewhere and does not duplicate material already published. I confirm all authors consent to publication of this Work and authorise the granting of this licence.

1  
2 1 **ROTATOR CUFF RELATED SHOULDER PAIN: DOES THE TYPE OF EXERCISE INFLUENCE THE**  
3 2 **OUTCOMES? – PROTOCOL OF A RANDOMIZED CONTROLLED TRIAL**

4  
5 3 **VERSION 7.3 (SEPTEMBER 14, 2020)**  
6 4

7  
8 5 Marc-Olivier Dubé, PT, PhD(c)<sup>1,2</sup>, François Desmeules, PT, PhD<sup>3,4</sup>, Jeremy Lewis, PT, PhD<sup>5,6,7</sup> Orcid:  
9 6 0000-0001-7870-9165, Jean-Sébastien Roy, PT, PhD<sup>1,2</sup>  
10  
11 7

12  
13 8 <sup>1</sup> Center for Interdisciplinary Research in Rehabilitation and Social Integration, Quebec City, Quebec,  
14 9 Canada G1M 2S8  
15

16 10 <sup>2</sup> Department of Rehabilitation, Faculty of Medicine, Université Laval, Quebec City, Quebec, Canada  
17 11 G1R 1P5  
18

19 12 <sup>3</sup> Orthopaedic Clinical Research Unit, Maisonneuve-Rosemont Hospital Research Center, University of  
20 13 Montreal Affiliated Research Center, Montreal, Canada  
21

22 14 <sup>4</sup> Faculty of Medicine, School of Rehabilitation, University of Montreal, Montreal, Canada  
23

24 15 <sup>5</sup> School of Health and Social Work, University of Hertfordshire, Hatfield AL10 9AB, Hertfordshire,  
25 16 United Kingdom.  
26

27 17 <sup>6</sup> Therapy Department, Central London Community Healthcare National Health Service Trust, London,  
28 18 United Kingdom.  
29

30 19 <sup>7</sup> Department of Physical Therapy & Rehabilitation Science, College of Health Sciences, Qatar  
31 20 University, Doha, Qatar.  
32

33 21  
34 22 **Corresponding Author**  
35

36 23  
37 24 Jean-Sébastien Roy, PT, PhD  
38 25 Université Laval  
39

40 26  
41 27 Centre for Interdisciplinary Research in Rehabilitation and Social Integration  
42 28 525, Boulevard Wilfrid-Hamel, office H-1710  
43 29 Quebec (Quebec) G1M 2S8  
44 30 418 529-9141 # 6005  
45 31  
46 31

47  
48 32 Email: [jean-sebastien.roy@fmed.ulaval.ca](mailto:jean-sebastien.roy@fmed.ulaval.ca)  
49

50 33 Keywords: shoulder, rotator cuff, rehabilitation, exercises, shoulder pain  
51

52 34 Word count: 3725  
53  
54  
55  
56  
57  
58  
59



## ABSTRACT

INTRODUCTION: Lifetime prevalence of shoulder pain is 70%, and approximately 50% of people with shoulder pain will experience pain for more than a year. Rotator cuff related shoulder pain (RCRSP) is the most common shoulder condition and the main non-surgical intervention is exercise therapy. For approximately 30% of people with RCRSP, this approach does not lead to a significant reduction in symptoms. This may be due to an inappropriate dosage or choice of exercises. The aim of this investigation is to compare the short, mid and long-term effects, in terms of symptoms, functional limitations, kinesiophobia and pain catastrophizing, of 3 different shoulder rehabilitation approaches (education, strengthening, motor control) in adults with RCRSP.

METHODS AND ANALYSIS: In this single-blind (assessor), parallel group randomized clinical trial, 123 adults presenting with RCRSP will take part in a 12-week rehabilitation program. They will be randomly assigned to 1 of 3 groups (education only, strengthening approach or motor control focused approach). *QuickDASH*, the primary outcome, Western Ontario Rotator Cuff index and Brief Pain Inventory will evaluate symptoms and functional limitations, while Tampa Scale of Kinesiophobia and Pain Catastrophizing Scale will evaluate pain-related fear and catastrophizing at baseline and at 3, 6, 12 and 24 weeks. Ultrasonographic acromiohumeral distances and tendon thickness will be assessed at baseline and 12 weeks. Intervention groups will be compared on outcomes with intention-to-treat analyses using two-way repeated measures analysis of variance if the data are normally distributed or Nonparametric Analysis for Longitudinal Data (nparLD) if they are not.

ETHICS AND DISSEMINATION: Ethics approval was obtained from the Ethics Committee of the Centre Integrated University Health and Social Services. Results will be disseminated through international publications in peer-reviewed journals, in addition to international conference presentations.

TRIAL REGISTRATION NUMBER: Protocol was registered at ClinicalTrials.gov (NCT03892603) on May 22, 2019. Data from this trial will be available from the corresponding author on request.

## ARTICLE SUMMARY

### Strengths And Limitations of This Study

- This randomized controlled trial directly compares three of the most widely used interventions for RCRSP (education, strengthening and motor control exercises) to highlight the most efficient and guide shoulder rehabilitation.
- Effects on symptoms, kinesiophobia, catastrophisation, acromiohumeral distance and tendon thickness of different exercise programs as well as education will be analyzed.
- Methods to reduce the risk of bias will be implemented throughout the study, which includes a statistically justified sample size, blinding, randomization and adequate concealment of group allocation for the assessors.
- Patients will be blinded to the treatment provided to the other groups as it is not feasible to completely blind the participants and the treating therapist due to the nature of the allocated treatments.
- A true control group (wait-and-see approach) will not be included as it would be difficult to maintain a high retention and avoid co-interventions during the mid- and long-term follow-up.

## INTRODUCTION

Shoulder pain is one of the most frequent musculoskeletal complaints in the general population with a lifetime prevalence of up to 70%.<sup>1</sup> The overall prognosis is highly variable, with up to 50% of patients still reporting persistent pain 6 to 12 months after seeking an initial primary care consultation.<sup>1</sup> Rotator cuff related shoulder pain (RCRSP), a broad term that includes rotator cuff tendinopathy, tendinitis, tendinosis, partial and atraumatic full-thickness rotator cuff tears, impingement and subacromial pain, accounts for 50 to 85% of diagnoses for shoulder pain.<sup>2</sup>

Several interventions are available for RCRSP such as education, exercise, manual therapy, electrotherapy, injection, medication and surgery. Clinical trials suggest that the long-term outcomes of patients pharmacologically or surgically treated are comparable to those receiving rehabilitation.<sup>3-6</sup> Regardless of modality, treatment is unsuccessful for more than one third of patients who continue to have pain and disability following care.<sup>7</sup> Several reasons may explain this lack of effectiveness and include; psychosocial factors (including kinesiophobia<sup>7</sup> and pain catastrophizing<sup>8</sup>), occupational factors, lifestyle factors<sup>9</sup>, lack of adherence to the exercise program<sup>3</sup>, low expectations regarding recovery and low levels of self-efficacy<sup>4,5</sup>. Other reasons behind this lack of success might be inadequate choice of exercise.

Education and exercises are two of the most frequently used interventions for RCRSP with evidence supporting their effectiveness.<sup>6,10,11</sup> Patient education often constitutes the first management strategy in health-related conditions as it doesn't necessitate extensive resources and is available to all. It helps reduce false beliefs and fears related to the pathology as well as increase patient's knowledge of their condition in order to improve their self-efficacy.<sup>6</sup> However, education alone might not be sufficient for all patients, as some may present deficits such as muscular weakness or inhibition, altered shoulder muscle recruitment patterns and kinematics.<sup>12,13</sup> These deficits might explain the persistence of symptoms in some patients. Recent systematic reviews strongly recommend with low to moderate quality evidence that exercises be prioritized as a first line intention treatment since it presents better outcome on pain and function than placebo or wait-and-see.<sup>14,15</sup> However, we still don't know which types of exercise are better and thus lead to better outcomes.<sup>13</sup> There is even some evidence in the literature suggesting that some types of exercise may not be more effective than a placebo.<sup>16,17</sup> These findings highlight the need for higher quality studies evaluating the effect of different exercises for RCRSP.

Motor control exercises have been shown to reduce pain and disability in individuals with RCRSP.<sup>10</sup> One rationale behind these effects is that improving muscle recruitment patterns and kinematics could prevent the compression of the subacromial soft tissues underneath the coracoacromial arch as the arm elevates.<sup>12</sup> Apart from this potential explanation that is still debated,<sup>2</sup> efficiency of motor control exercises might reside in the reduction of fear-avoidance behavior or pain catastrophizing as the patients are encouraged to move in previously feared positions.<sup>18</sup> It could also have a direct neurophysiological central effect on pain-related brain areas, similar to the one observed with manual therapy,<sup>19,20</sup> and bring change in pain sensitivity and sensorimotor processing. On the other hand, by progressively loading contractile tissue, strengthening exercises have been shown to decrease pain and muscle weakness.<sup>11</sup> This could be the result of an increased capacity by the tendon to sustain load or to a decrease in rotator cuff tendon inhibition.<sup>21</sup>

Although their clinical usefulness has already been assessed separately,<sup>22,23</sup> no study has directly compared those three interventions for the management of RCRSP in order to better highlight recovery over time as well as the choice of intervention provided. Identifying the most effective and efficient intervention(s) for RCRSP is of paramount importance to prevent symptoms persistence, limit health care costs associated with these disorders and all resulting consequences.

### Objective and hypotheses

1  
2 126 The primary objective of this randomized controlled trial (RCT) is to compare the short, mid and long-  
3 127 term effects of three different approaches (education, strengthening, motor control) of delivering  
4 128 shoulder management on the symptoms and functional limitations of individuals with RCRSP. A  
5 129 secondary objective is to explore the effects of the programs on shoulder control (acromiohumeral  
6 130 distance), subacromial structures (supraspinatus and infraspinatus tendon thickness), kinesiophobia and  
7 131 catastrophisation related to shoulder pain. The hypothesis is that both exercises groups will demonstrate  
8 132 a better outcome in pain and function compared to the education group. The motor control program  
9 133 should lead to a quicker improvement in symptoms and functional limitations than the strengthening  
10 134 program because, by improving muscle recruitment patterns, it will decrease control deficits and thus  
11 135 lower the odds of individuals experiencing pain. Its effect on kinesiophobia should also contribute to a  
12 136 quicker reintegration of movements into patients' life, hence improve function. Finally, all groups should  
13 137 lead to a decrease in kinesiophobia and pain catastrophisation, but the motor control and strengthening  
14 138 groups should lead to a greater reduction since participants will be guided to move in amplitudes that  
15 139 were previously limited by pain or pain-related fears or perform near-maximal intensity muscle  
16 140 contractions.

## 19 20 141 **METHODS AND ANALYSIS**

### 21 142 **Study Design**

22  
23 143 This single-blind parallel group RCT will include 5 evaluation sessions over 24 weeks (baseline, 3, 6, 12  
24 144 and 24 weeks), 6 intervention sessions over 12 weeks for both exercises groups and 2 education sessions  
25 145 over 12 weeks for the education group (Figure 1). All participants will take part in the baseline evaluation.  
26 146 They will complete self-administered questionnaires on sociodemographic characteristics,  
27 147 symptomatology, comorbidities, functional limitations, kinesiophobia, and pain catastrophizing using  
28 148 self-reported questionnaires. Then, ultrasonographic (US) measurements of the acromiohumeral distance  
29 149 (ADH) and of the supraspinatus (SS) and infraspinatus (IS) tendons thickness will be conducted.  
30 150 Thereafter, participants will be randomly assigned to one of three intervention groups, and take part in  
31 151 their assigned program. All study outcomes will be reevaluated at 12 weeks, while the self-administered  
32 152 questionnaires will also be re-administrated at 3, 6- and 24-weeks using web-based questionnaires. A  
33 153 global rating of change question will be completed at 3, 6, 12 and 24 weeks. The study will be conducted  
34 154 at the *Centre interdisciplinaire de recherche en réadaptation et en intégration sociale* (CIRIS). This  
35 155 RCT is registered on ClinicalTrials.gov (NCT03892603) and the SPIRIT checklist was used when  
36 156 writing the protocol.<sup>24</sup>

### 39 40 157 **INSERT FIGURE 1**

### 41 158 **Participants and Sample size**

42  
43 159 Adults presenting with RCRSP will be recruited using the following inclusion criteria: 1) 18-75 years of  
44 160 age, 2) symptoms lasting longer than 3 months, 3) presence of a painful arc in flexion or abduction, 4)  
45 161 presence of a positive Neer sign or Hawkin's Kennedy Test, 5) presence of pain when resisting humeral  
46 162 external rotation or abduction, or positive Jobe Test, and 6) ability to speak English or French. A positive  
47 163 cluster of criteria 3, 4 and 5 represents an adequate diagnostic tool for RCRSP (Sn: 0.75, Sp: 0.74).<sup>25</sup>  
48 164 Participants will be excluded if they present any of the following criteria: 1) clinical signs of massive  
49 165 rotator cuff tears as defined by presence of gross weakness in the absence of limited pain, 2) other  
50 166 shoulder disorders e.g. adhesive capsulitis (restriction of passive glenohumeral movement of at least 30%  
51 167 for 2 or more directions), severe osteoarthritis, fracture, dislocation, severe acromioclavicular joint  
52 168 pathology, 3) previous shoulder surgery, 4) presence of significant co-morbidity e.g. neurological  
53 169 disorders, rheumatoid arthritis, 5) current or past carcinoma, 6) unlikely to be able to perform required  
54 170 clinical assessment tasks or attend the required evaluation and intervention sessions, 7) symptomatic  
55 171 cervical spine pathology, defined as reproduction of symptoms with active physiological cervical spine

1  
2 172 movements, and 8) corticosteroid injection in the last 6 weeks. All recruited participants will be evaluated  
3 173 by a physiotherapist in order to confirm their eligibility.

4  
5 174 Based on our sample size calculation, calculated for our primary outcome (*QuickDASH*), **41**  
6 175 **participants are required per group** (G\*Power 3.1.9; effect size: 0.80,  $\alpha = 0.05$ , Power = 0.95, SD =  
7 176 13 DASH points, clinically important difference (CID) = 11 DASH points, expected lost at follow-up =  
8 177 15%). Therefore, 123 participants with RCRSP will be recruited. This sample size should be sufficient  
9 178 to detect a clinically important difference (CID) between groups.

10  
11 179 Potential participants will be recruited in outpatient physiotherapy clinics of hospitals and in private  
12 180 physiotherapy clinics in the Quebec City region, and through electronic mailing lists of employees and  
13 181 students at *Université Laval* (> 52,000 individuals). Since our research team has performed studies  
14 182 evaluating the same population in the same metropolitan area, we are confident to recruit the targeted  
15 183 population.<sup>26-28</sup> With an average rate of 7 new participants per month, we estimate that 18 months will  
16 184 be ample time to reach our goal of 123 participants.

### 18 185 **Randomisation and blinding**

19  
20 186 A randomisation list has been generated prior to the initiation of the study by an independent research  
21 187 assistant not involved in data collection using a random number generator. Allocation is concealed in  
22 188 sealed and opaque envelopes that are sequentially numbered. Randomisation was stratified to ensure  
23 189 balance of the treatment groups with respect to sex (male / female) and age (18-55 / 55-75). A blocked  
24 190 randomisation was also used to make sure that three equal groups of 41 participants will be obtained  
25 191 (random blocks of 3, 6 or 9). Given that it is impossible to blind the treating PT and participants, a single-  
26 192 blind design will be used. To reduce potential contamination bias, the three programs will be given at  
27 193 different time periods. Further, participants will be instructed not to discuss their group assignment,  
28 194 exercises performed, or advice received with other potential participants and with the evaluator. To  
29 195 evaluate the effectiveness of blinding at the 3 month follow-up, the evaluator will answer the following  
30 196 question: *What intervention do you think the participant received?*; with one of the following answers:  
31 197 1) Education and advice, 2) Strengthening, 3) Motor control, or 4) No idea. If they answer 1, 2 and 3,  
32 198 they will have to explain why they think the participant received this intervention.

### 35 199 **Interventions:**

36  
37 200 Advice and education program: During two education sessions of 30 minutes each, participants will be  
38 201 given written information by a physiotherapist about the shoulder (anatomy and function), basic pain  
39 202 science and will be directed to watch a series of six educational videos on shoulder pain and function,  
40 203 persistent pain, physical activity, stress, sleep and eating habits. For each video, they will have two  
41 204 questions to answer: 1) What was the most important message? and 2) Was there anything you didn't  
42 205 understand in the video? The comprehensive written information includes advice on:

- 44  
45 206 • The shoulder and their condition
- 46 207 • The relevance of pain
- 47  
48 208 • Pain management (night and day)
- 49  
50 209 • Activity modification (when to increase and decrease)
- 51  
52 210 • Reassurance

53 211 Shoulder muscle strengthening program: In addition to the same advice and education the control group  
54 212 receives, participants from this group will be given a shoulder progressive strengthening exercises  
55 213 program (Supplementary file 1) based on 1 RM that will involve concentric and eccentric contractions  
56 214 with free weights and resistance elastic tubes. Exercises will target humeral internal/external rotators and

1  
2 215 abductors and the scapular muscles (protractors, retractors, elevators and depressors). Number of  
3 216 repetitions will be one set of the maximum number of repetitions until muscular exertion or until pain  
4 217 reaches 3/10. If the pain level is 3/10 or more at rest, participants will be asked to start with a lower  
5 218 number of repetitions and increase or decrease depending on their pain behavior in the following hours  
6 219 and the next day. Participants will be asked to complete the exercises every day for 12 weeks. At each  
7 220 session with the physiotherapist (6 over a 12-week period), shoulder movements and strength will be  
8 221 reassessed, and the program will be progressed accordingly. The necessary equipment (dumbbells, elastic  
9 222 bands) will be provided to the participants. Any questions or concerns will also be addressed by the  
10 223 treating physiotherapist, and participants will be requested to complete a daily diary of their exercise  
11 224 adherence.  
12  
13

#### 14 225 **INSERT SUPPLEMENTARY FILE 1**

15  
16 226 Motor control and functional rehabilitation exercise program: Participants will receive the same advice  
17 227 and education as the other groups as well as a motor control exercises program (Supplementary file 2).  
18 228 Each session with the physiotherapist (6 over a 12-week period) will start with a pain neuro-modulatory  
19 229 (motor control) technique in order to look at the influence of different corrections to alleviate symptoms  
20 230 during upper limb movements. A series of quick clinical tests will be conducted taking no more than 3  
21 231 minutes. The tests will be performed in a sequential format through three key areas: thoracic ‘finger on  
22 232 sternum technique’, scapular facilitation, ‘humeral head’ procedures.<sup>29,30</sup> If a technique reduces pain, that  
23 233 technique will then be performed as exercises and incorporated into the participant’s functional  
24 234 movement. In addition, motor control exercises during arm elevation, progressed through a standardized  
25 235 6-phase retraining sequence, will be executed.<sup>26,31–33</sup> Retraining phases will be graded according to: 1)  
26 236 resistance applied to the shoulder; and 2) use or non-use of feedback. Once participants have reached  
27 237 pain free execution, the program will be progressed into re-education exercises according to the  
28 238 participants’ work, sports and activities of daily living and incorporate a series of functional activities  
29 239 involving the whole body. Number of repetitions will vary from one to three sets of 10 to 30 repetitions.  
30 240 Participants will be asked to complete the exercises every day. The necessary equipment (dumbbells,  
31 241 elastic bands) will be provided to the participants. Participants will be requested to complete a daily diary  
32 242 of their exercise adherence.  
33  
34

35  
36 243 Both exercise groups will be given information about pain related to the execution of their exercise  
37 244 program (Supplementary file 3).

#### 38 245 **INSERT SUPPLEMENTARY FILE 2**

#### 39 246 **INSERT SUPPLEMENTARY FILE 3**

#### 40 247 **Data collection**

41  
42 248 An evaluator blinded to group assignment will perform all evaluations according to standardised  
43 249 procedures.

44  
45 250 Symptoms & Functional limitations will be evaluated using the *QuickDASH* (generic questionnaire  
46 251 assessing any upper limb disorders), the primary outcome, as well as two other validated self-reported  
47 252 questionnaires: Western Ontario Rotator Cuff index (WORC; specific to RCRSP), and the short form of  
48 253 Brief Pain Inventory (BPI-SF). The *QuickDASH* is a self-reported questionnaire that includes 11 items  
49 254 measuring physical disability and symptoms of the upper extremity. It presents excellent reliability, is  
50 255 responsive to change, has a minimal detectable change (MDC) and CID around 11%.<sup>34</sup> The WORC index  
51 256 is a disease-specific questionnaire developed to measure, pain, function and health related quality-of-life  
52 257 of individuals suffering from RCRSP. It contains 21 items divided into five sections: physical symptoms,  
53 258 sports/recreation, work, lifestyle and emotions. It has demonstrated excellent reliability, is responsive to  
54 259 change for patients with RCRSP, has a MDC around 12% and a CID varying from 12% to 13%.<sup>35</sup> Finally,  
55  
56  
57  
58  
59  
60

1  
2 260 the BPI-SF is a validated questionnaire used to assess the intensity of pain and the interference of the  
3 261 pain on the patient's life. It has shown to be reliable, internally consistent over time and valid with several  
4 262 MSK population including RCRSP.<sup>36</sup>

5  
6 263 *Pain-related fear & catastrophizing:* The Tampa Scale of Kinesiophobia (TSK) is a self-administered  
7 264 questionnaire that measures beliefs and behaviours related with pain, specially focusing on beliefs that  
8 265 pain is damaging and painful movements should be avoided.<sup>37</sup> The psychometric properties of the TSK  
9 266 have been confirmed for different pain disorders.<sup>38</sup> The Pain Catastrophizing Scale (PCS) is a self-  
10 267 administered questionnaire measuring the range of catastrophic thoughts and feelings (magnified threat,  
11 268 ruminating thoughts and feelings of helplessness) associated with pain that individuals may experience.  
12 269 High internal reliability has been reported in patients with chronic pain with adequate validity and test-  
13 270 retest reliability.<sup>39</sup>

14 270  
15  
16 271 *US measurement of acromiohumeral distance and supraspinatus and infraspinatus tendon* will be  
17 272 assessed with a 12-MHz linear array probe (Logic e9, GE Healthcare, Milwaukee, WI, USA). US images  
18 273 of AHD will be obtained with the participants seated in a standardized position with the arm at rest and  
19 274 at 60° of active abduction. US measures will be obtained by placing the transducer on the anterior aspect  
20 275 of the lateral surface of acromion along the longitudinal axis of the humerus in a frontal plane. The AHD  
21 276 will be measured using the built-in electronic caliper option by manually locating the superior aspect of  
22 277 the humeral head and the inferior aspect of acromion and then measuring the shortest linear distance  
23 278 between those two landmarks. For each upper limb position, three measurements will be taken (intraclass  
24 279 correlation coefficient [ICC]: 0.98; MDC: 0.7 mm).<sup>40</sup> Thickness of the supraspinatus (SS) tendon will be  
25 280 obtained with the medial aspect of the wrist against the ipsilateral anterior superior iliac spine. Measures  
26 281 will be obtained with the transducer perpendicularly, one centimeter behind to the anterolateral aspect of  
27 282 the surface of the acromion. The thickness of the SS tendon borders will be defined inferiorly as the first  
28 283 hyperechoic region above the anechoic articular cartilage of the humeral head, and the hyperechoic  
29 284 superior border of the tendon before the anechoic subdeltoid bursa. Infraspinatus tendon thickness will  
30 285 be measured at the level of the posterior border of the acromion with the hand placed on the opposite  
31 286 shoulder. The thickness of the IS tendon borders will be defined inferiorly as the first hyperechoic region  
32 287 above the anechoic articular cartilage of the humeral head, and the hyperechoic superior border of the  
33 288 tendon. These US tendon measures have been shown reliable (ICC > 0.92).<sup>40</sup>

### 34 289 **Withdrawal of individuals participants**

35 290 All dropouts and their underlying reasons will be reported. Principles underlying 'intention-to-treat'  
36 291 analysis will be followed, meaning that every participant will be analyzed according to the randomized  
37 292 treatment assignment. Therefore, non-compliance, protocol deviation and withdrawal will all be ignored  
38 293 in the primary analyses. Additionally, 'per-protocol' analysis (i.e., the analysis will be restricted to  
39 294 participants who adhered to the intervention as stipulated in the protocol) will also be performed. To  
40 295 ensure appropriate insight of mechanisms underlying changes in symptoms and function, only  
41 296 participants who completed evaluation at week 12 will be considered for the US-based outcomes. Any  
42 297 harm or unintended effects during the interventions will be recorded. If a participant presents with an  
43 298 adverse event, the primary investigator will report it to the Ethics Committee.

### 44 299 **Data integrity and analysis**

45 300 All collected data will be accessible only to the research team. All data will be kept for 5 years after the  
46 301 end of the study to ensure the completion of planned publications. After this period, all data will be  
47 302 destroyed. A Data Monitoring Committee is not necessary as this trial is low risk since it is not a very  
48 303 large RCT. The research team has opted not to undertake interim analysis.

### 49 304 **Statistical Analyses**

1  
2 305 Descriptive statistics will be used for all outcome measures at each measurement time to summarise  
3 306 results. Baseline demographic data will be compared (independent *t*-tests and Chi-squared tests) to  
4 307 establish the comparability of groups. All data will be tested to check the distributional assumptions for  
5 308 inferential statistical analyses. If data are normally distributed, a 2-way repeated-measures ANOVA (3  
6 309 interventions [Control or Strengthening or Motor control] x 5 Time [0, 3, 6, 12 and 24 weeks]) will be  
7 310 used to analyse and compare the effects of the three programs on primary outcome (quick-DASH) as  
8 311 well as secondary outcomes (X 2 time for the US-based outcomes [0 and 12 weeks]). Analyses will be  
9 312 made using nparLD package (R software) if parametric criteria are not met since it is not possible to  
10 313 assume that the covariance matrix is a compound-symmetry matrix. For the multiple comparisons,  
11 314 Bonferroni post-hoc test will be used. Alpha level was set at 0.05.  
12  
13

### 14 315 **Patient and Public Involvement**

15  
16 316 This research was done without patient involvement. Patients were not invited to comment on the study  
17 317 design and were not consulted to develop patient relevant outcomes. Patients will not be invited to  
18 318 contribute to the writing or editing of this document for readability or accuracy.  
19

### 20 319 **DISCUSSION**

21 320 It is essential to develop and identify effective interventions for the management of shoulder pain since  
22 321 it may become chronic and lead to adverse consequences such as decreased participation and quality of  
23 322 life, absenteeism at work, early retirement, multiple medical consultations as well as high associated  
24 323 health costs. As stated earlier, up to 30% of individuals with RCRSP still present pain and disability after  
25 324 rehabilitation interventions such as rehabilitation exercises. A recent study conducted by our research  
26 325 team showed that a rehabilitation program comprising mainly motor control exercises led to fewer than  
27 326 15% of individuals showing unsatisfactory results.<sup>26</sup> In order to further decrease this percentage, we have  
28 327 attempted to compare different bonified exercise programs. We have added exercises targeting the whole  
29 328 body, not only the shoulder, to our motor control program because we believe it is essential to involve  
30 329 the whole body since deficits in trunk or lower limb capacity may overload the upper limb during  
31 330 activities of daily living. On the other hand, multiple studies have shown promising results from  
32 331 strengthening programs primarily targeting shoulder abductors and external rotators.<sup>2</sup> We believe that  
33 332 adding strengthening exercises for other shoulder muscles such as scapular muscles could lead to even  
34 333 better results.  
35  
36  
37

38 334 A true control group (wait-and-see approach) will not be included as it would be difficult to maintain a  
39 335 high retention and avoid co-interventions during the mid- and long-term follow-up. We also chose not to  
40 336 include a placebo group, as it is hard to have a real placebo for this type of study and it is not really  
41 337 ethically fair for the participants given that they will be followed for the 6 months and that the exercises  
42 338 used in the programs have been shown to be superior to placebo.<sup>14</sup>  
43

44 339 Defining more efficient rehabilitation regimens for common conditions such as RCRSP is important as  
45 340 it may lead to a reduction in associated costs. Therefore, the present study will establish the effectiveness  
46 341 of these two programs and determine if one is more effective than the other or more effective than  
47 342 education.  
48

### 49 343 **ETHICS**

50  
51 344 Ethics approval was obtained from the sectorial rehabilitation and social integration research ethics  
52 345 committee of the CIUSSS-CN (#2019-1762).  
53

### 54 346 **Consent**

1  
2 347 Detailed information about the research and experimental procedures will be provided to all participants  
3 348 before signature of the written informed consent. Participants will be requested to sign a detailed  
4 349 informed consent before starting any experimental procedure (supplementary file 4).  
5

### 6 350 **Confidentiality**

7  
8 351 All research team members will respect the data confidentiality of the patients, in agreement with the  
9 352 law. Patients' names will be coded to keep their identity confidential; however, a list of name and  
10 353 respective codes will be stored in a locked and filing cabinet. All information collected during the study,  
11 354 including test results, will be treated as confidential. The trial data set will be accessible only to the  
12 355 research team and the Ethics Committee of the CIUSSS-CN for purposes of management or audit of  
13 356 research development. Publications related to these data will respect all principles of confidentiality.  
14

### 15 357 **Dissemination**

16  
17 358 Results of this protocol will be disseminated through international publication in peer-reviewed journals,  
18 359 in addition to international conference presentations. Participants, clinicians and relevant research staff  
19 360 in the field will be informed about the results of the study.  
20

21 361  
22 362 *Caption : Figure 1: Schematic diagram of the study design. QuickDASH, Abbreviated version of the*  
23 363 *Disabilities of the Arm, Shoulder and Hand questionnaire; WORC, Western Ontario Rotator Cuff Index;*  
24 364 *BPI, Brief Pain Inventory; TSK, Tampa Scale of Kinesiophobia; PCS, Pain Catastrophizing Scale; AHD,*  
25 365 *Acromiohumeral distance; SST, supraspinatus tendon; IST, infraspinatus tendon; GRC, Global rating of*  
26 366 *change*  
27  
28  
29  
30  
31  
32  
33  
34  
35  
36  
37  
38  
39  
40  
41  
42  
43  
44  
45  
46  
47  
48  
49  
50  
51  
52  
53  
54  
55  
56  
57  
58  
59  
60



## References

1. Cadogan A, Laslett M, Hing WA, McNair PJ, Coates MH. A prospective study of shoulder pain in primary care: prevalence of imaged pathology and response to guided diagnostic blocks. *BMC Musculoskelet Disord.* 2011;12:119. doi:10.1186/1471-2474-12-119
2. Lewis J. Rotator cuff related shoulder pain: Assessment, management and uncertainties. *Man Ther.* 2016;23:57-68. doi:10.1016/j.math.2016.03.009
3. Dean BJB, Gwilym SE, Carr AJ. Why does my shoulder hurt? A review of the neuroanatomical and biochemical basis of shoulder pain. *Br J Sports Med.* 2013;47(17):1095-1104. doi:10.1136/bjsports-2012-091492
4. Chester R, Shepstone L, Daniell H, Sweeting D, Lewis J, Jerosch-Herold C. Predicting response to physiotherapy treatment for musculoskeletal shoulder pain: a systematic review. *BMC Musculoskelet Disord.* 2013;14:203. doi:10.1186/1471-2474-14-203
5. Chester R, Jerosch-Herold C, Lewis J, Shepstone L. Psychological factors are associated with the outcome of physiotherapy for people with shoulder pain: a multicentre longitudinal cohort study. *Br J Sports Med.* 2018;52(4):269-275. doi:10.1136/bjsports-2016-096084
6. Carlson H, Carlson N. An Overview of the Management of Persistent Musculoskeletal Pain. *Ther Adv Musculoskelet Dis.* 2011;3(2):91-99. doi:10.1177/1759720X11398742
7. Thompson EL, Broadbent J, Bertino MD, Staiger PK. Do Pain-related Beliefs Influence Adherence to Multidisciplinary Rehabilitation?: A Systematic Review. *Clin J Pain.* 2016;32(2):164-178. doi:10.1097/AJP.0000000000000235
8. Sandford FM, Sanders TAB, Lewis JS. Exploring experiences, barriers, and enablers to home- and class-based exercise in rotator cuff tendinopathy: A qualitative study. *J Hand Ther Off J Am Soc Hand Ther.* 2017;30(2):193-199. doi:10.1016/j.jht.2017.05.001
9. Dean E, Söderlund A. What is the role of lifestyle behaviour change associated with non-communicable disease risk in managing musculoskeletal health conditions with special reference to chronic pain? *BMC Musculoskelet Disord.* 2015;16:87. doi:10.1186/s12891-015-0545-y
10. De Mey K, Danneels L, Cagnie B, Cools AM. Scapular Muscle Rehabilitation Exercises in Overhead Athletes With Impingement Symptoms: Effect of a 6-Week Training Program on Muscle Recruitment and Functional Outcome. *Am J Sports Med.* 2012;40(8):1906-1915. doi:10.1177/0363546512453297
11. Maenhout AG, Mahieu NN, De Muynck M, De Wilde LF, Cools AM. Does adding heavy load eccentric training to rehabilitation of patients with unilateral subacromial impingement result in better outcome? A randomized, clinical trial. *Knee Surg Sports Traumatol Arthrosc Off J ESSKA.* 2013;21(5):1158-1167. doi:10.1007/s00167-012-2012-8
12. Seitz AL, Podlecki LA, Melton ER, Uhl TL. NEUROMUSCULAR ADAPTIONS FOLLOWING A DAILY STRENGTHENING EXERCISE IN INDIVIDUALS WITH ROTATOR CUFF RELATED SHOULDER PAIN: A PILOT CASE-CONTROL STUDY. *Int J Sports Phys Ther.* 2019;14(1):74-87.
13. Shire AR, Stæhr TAB, Overby JB, Bastholm Dahl M, Sandell Jacobsen J, Høytrup Christiansen D. Specific or general exercise strategy for subacromial impingement syndrome--does it matter? A systematic literature review and meta analysis. *BMC Musculoskelet Disord.* 2017;18(1):158. doi:10.1186/s12891-017-1518-0
14. Gebremariam L, Hay EM, van der Sande R, Rinkel WD, Koes BW, Huisstede BMA. Subacromial impingement syndrome--effectiveness of physiotherapy and manual therapy. *Br J Sports Med.* 2014;48(16):1202-1208. doi:10.1136/bjsports-2012-091802
15. Steuri R, Sattelmayer M, Elsig S, et al. Effectiveness of conservative interventions including exercise, manual therapy and medical management in adults with shoulder impingement: a systematic review and meta-analysis of RCTs. *Br J Sports Med.* 2017;51(18):1340-1347. doi:10.1136/bjsports-

- 1  
2 415 2016-096515  
3 416 16. Page MJ, Green S, McBain B, et al. Manual therapy and exercise for rotator cuff disease.  
4 417 *Cochrane Database Syst Rev.* 2016;(6). doi:10.1002/14651858.CD012224  
5 418 17. Bennell K, Wee E, Coburn S, et al. Efficacy of standardised manual therapy and home exercise  
6 419 programme for chronic rotator cuff disease: randomised placebo controlled trial. *BMJ.* 2010;340.  
7 420 doi:10.1136/bmj.c2756  
8 421 18. Vaegter HB, Madsen AB, Handberg G, Graven-Nielsen T. Kinesiophobia is associated with  
9 422 pain intensity but not pain sensitivity before and after exercise: an explorative analysis. *Physiotherapy.*  
10 423 2018;104(2):187-193. doi:10.1016/j.physio.2017.10.001  
11 424 19. Roy J-S, Bouyer LJ, Langevin P, Mercier C. Beyond the Joint: The Role of Central Nervous  
12 425 System Reorganizations in Chronic Musculoskeletal Disorders. *J Orthop Sports Phys Ther.*  
13 426 2017;47(11):817-821. doi:10.2519/jospt.2017.0608  
14 427 20. Ellingson LD, Stegner AJ, Schwabacher IJ, Koltyn KF, Cook DB. Exercise Strengthens Central  
15 428 Nervous System Modulation of Pain in Fibromyalgia. *Brain Sci.* 2016;6(1).  
16 429 doi:10.3390/brainsci6010008  
17 430 21. Michener LA, Subasi Yesilyaprak SS, Seitz AL, Timmons MK, Walsworth MK. Supraspinatus  
18 431 tendon and subacromial space parameters measured on ultrasonographic imaging in subacromial  
19 432 impingement syndrome. *Knee Surg Sports Traumatol Arthrosc Off J ESSKA.* 2015;23(2):363-369.  
20 433 doi:10.1007/s00167-013-2542-8  
21 434 22. Savoie A, Mercier C, Desmeules F, Frémont P, Roy J-S. Effects of a movement training  
22 435 oriented rehabilitation program on symptoms, functional limitations and acromiohumeral distance in  
23 436 individuals with subacromial pain syndrome. *Man Ther.* 2015;20(5):703-708.  
24 437 doi:10.1016/j.math.2015.04.004  
25 438 23. Worsley P, Warner M, Mottram S, et al. Motor control retraining exercises for shoulder  
26 439 impingement: effects on function, muscle activation, and biomechanics in young adults. *J Shoulder*  
27 440 *Elbow Surg.* 2013;22(4):e11-19. doi:10.1016/j.jse.2012.06.010  
28 441 24. Chan A-W, Tetzlaff JM, Altman DG, et al. SPIRIT 2013 Statement: Defining Standard Protocol  
29 442 Items for Clinical Trials. *Ann Intern Med.* 2013;158(3):200-207. doi:10.7326/0003-4819-158-3-  
30 443 201302050-00583  
31 444 25. Michener LA, Walsworth MK, Doukas WC, Murphy KP. Reliability and diagnostic accuracy of  
32 445 5 physical examination tests and combination of tests for subacromial impingement. *Arch Phys Med*  
33 446 *Rehabil.* 2009;90(11):1898-1903. doi:10.1016/j.apmr.2009.05.015  
34 447 26. Belley AF, Mercier C, Bastien M, Léonard G, Gaudreault N, Roy J-S. Anodal Transcranial  
35 448 Direct-Current Stimulation to Enhance Rehabilitation in Individuals With Rotator Cuff Tendinopathy:  
36 449 A Triple-Blind Randomized Controlled Trial. *J Orthop Sports Phys Ther.* 2018;48(7):541-551.  
37 450 doi:10.2519/jospt.2018.7871  
38 451 27. Dupuis F, Barrett E, Dubé M-O, McCreesh KM, Lewis JS, Roy J-S. Cryotherapy or gradual  
39 452 reloading exercises in acute presentations of rotator cuff tendinopathy: a randomised controlled trial.  
40 453 *BMJ Open Sport Exerc Med.* 2018;4(1):e000477. doi:10.1136/bmjsem-2018-000477  
41 454 28. Oliveira L de, Carlos F. Effects of kinesiotaping on symptoms, functional limitations, and  
42 455 underlying deficits on individuals with rotator cuff tendinopathy. Published online 2018. Accessed  
43 456 April 17, 2020. <https://corpus.ulaval.ca/jspui/handle/20.500.11794/33618>  
44 457 29. Lewis JS. Rotator cuff tendinopathy/subacromial impingement syndrome: is it time for a new  
45 458 method of assessment? *Br J Sports Med.* 2009;43(4):259-264. doi:10.1136/bjism.2008.052183  
46 459 30. Lewis JS, McCreesh K, Barratt E, Hegedus EJ, Sim J. Inter-rater reliability of the Shoulder  
47 460 Symptom Modification Procedure in people with shoulder pain. *BMJ Open Sport — Exerc Med.*  
48 461 2016;2(1). doi:10.1136/bmjsem-2016-000181  
49 462 31. Roy J-S, Moffet H, Hébert LJ, Lirette R. Effect of motor control and strengthening exercises on  
50 463 shoulder function in persons with impingement syndrome: a single-subject study design. *Man Ther.*  
51 464  
52 465  
53 466  
54 467  
55 468  
56 469  
57 470  
58  
59  
60

- 1  
2 464 2009;14(2):180-188. doi:10.1016/j.math.2008.01.010  
3 465 32. Roy J-S, Moffet H, McFadyen BJ, Lirette R. Impact of movement training on upper limb motor  
4 466 strategies in persons with shoulder impingement syndrome. *Sports Med Arthrosc Rehabil Ther Technol*  
5 467 *SMARTT*. 2009;1(1):8. doi:10.1186/1758-2555-1-8  
6 468 33. Roy J-S, Moffet H, McFadyen BJ. The effects of unsupervised movement training with visual  
7 469 feedback on upper limb kinematic in persons with shoulder impingement syndrome. *J Electromyogr*  
8 470 *Kinesiol Off J Int Soc Electrophysiol Kinesiol*. 2010;20(5):939-946. doi:10.1016/j.jelekin.2009.10.005  
9 471 34. Mintken PE, Glynn P, Cleland JA. Psychometric properties of the shortened disabilities of the  
10 472 Arm, Shoulder, and Hand Questionnaire (QuickDASH) and Numeric Pain Rating Scale in patients with  
11 473 shoulder pain. *J Shoulder Elbow Surg*. 2009;18(6):920-926. doi:10.1016/j.jse.2008.12.015  
12 474 35. St-Pierre C, Dionne CE, Desmeules F, Roy J-S. Reliability, validity, and responsiveness of a  
13 475 Canadian French adaptation of the Western Ontario Rotator Cuff (WORC) index. *J Hand Ther Off J*  
14 476 *Am Soc Hand Ther*. 2015;28(3):292-298; quiz 299. doi:10.1016/j.jht.2015.02.001  
15 477 36. Mendoza T, Mayne T, Rublee D, Clelland C. Reliability and validity of a modified Brief Pain  
16 478 Inventory short form in patients with osteoarthritis. *Eur J Pain Lond Engl*. 2006;10(4):353-361.  
17 479 doi:10.1016/j.ejpain.2005.06.002  
18 480 37. Kori S. Kinesiophobia: A new view of chronic pain behavior. *Pain Management*. 1990:35-43.  
19 481 38. Woby SR, Roach NK, Urmston M, Watson PJ. Psychometric properties of the TSK-11: a  
20 482 shortened version of the Tampa Scale for Kinesiophobia. *Pain*. 2005;117(1-2):137-144.  
21 483 doi:10.1016/j.pain.2005.05.029  
22 484 39. Sullivan M, Bishop S, Pivik J. The Pain Catastrophizing Scale: Development and Validation.  
23 485 *Psychol Assess*. 1996;7:524-532. doi:10.1037//1040-3590.7.4.524  
24 486 40. McCreesh KM, Anjum S, Crotty JM, Lewis JS. Ultrasound measures of supraspinatus tendon  
25 487 thickness and acromiohumeral distance in rotator cuff tendinopathy are reliable. *J Clin Ultrasound*  
26 488 *JCU*. 2016;44(3):159-166. doi:10.1002/jcu.22318  
27 489  
28  
29  
30  
31  
32  
33  
34  
35  
36  
37  
38  
39  
40  
41  
42  
43  
44  
45  
46  
47  
48  
49  
50  
51  
52  
53  
54  
55  
56  
57  
58  
59  
60

1  
2 490 **Author statement**  
3

4 491 MOD contributed to conception, design and preparation of the procedures, and data collection, and will  
5 492 conduct the recruitment, interventions, interpretation, data analyses and writing. FD and JSR contributed  
6 493 to study design and will contribute to the statistical analysis and interpretation of the data. JL contributed  
7 494 to conception, design and preparation of the procedures. All authors commented on the study protocol.  
8 495 All authors approved its final version.  
9 496

10 497  
11  
12 497 **Funding**

13  
14 498 This work was supported by the Quebec Rehabilitation Research Network (REPAR). MOD received a  
15 499 Master's training scholarship from the Fonds de Recherche Québec-Santé (FRQS). JSR and FD are  
16 500 supported by salary awards from the Canadian Institutes of Health Research (CIHR).  
17  
18 501

19 502 **Competing interests statement**  
20

21 503 All authors declare that they have no competing interests.  
22  
23  
24  
25  
26  
27  
28  
29  
30  
31  
32  
33  
34  
35  
36  
37  
38  
39  
40  
41  
42  
43  
44  
45  
46  
47  
48  
49  
50  
51  
52  
53  
54  
55  
56  
57  
58  
59  
60

**Figure 1:** Schematic diagram of the study design. *QuickDASH*, Abbreviated version of the Disabilities of the Arm, Shoulder and Hand questionnaire; WORC, Western Ontario Rotator Cuff Index; BPI, Brief Pain Inventory; TSK, Tampa Scale of Kinesiophobia; PCS, Pain Catastrophizing Scale; AHD, Acromiohumeral distance; SST, supraspinatus tendon; IST, infraspinatus tendon; GRC, Global rating of change

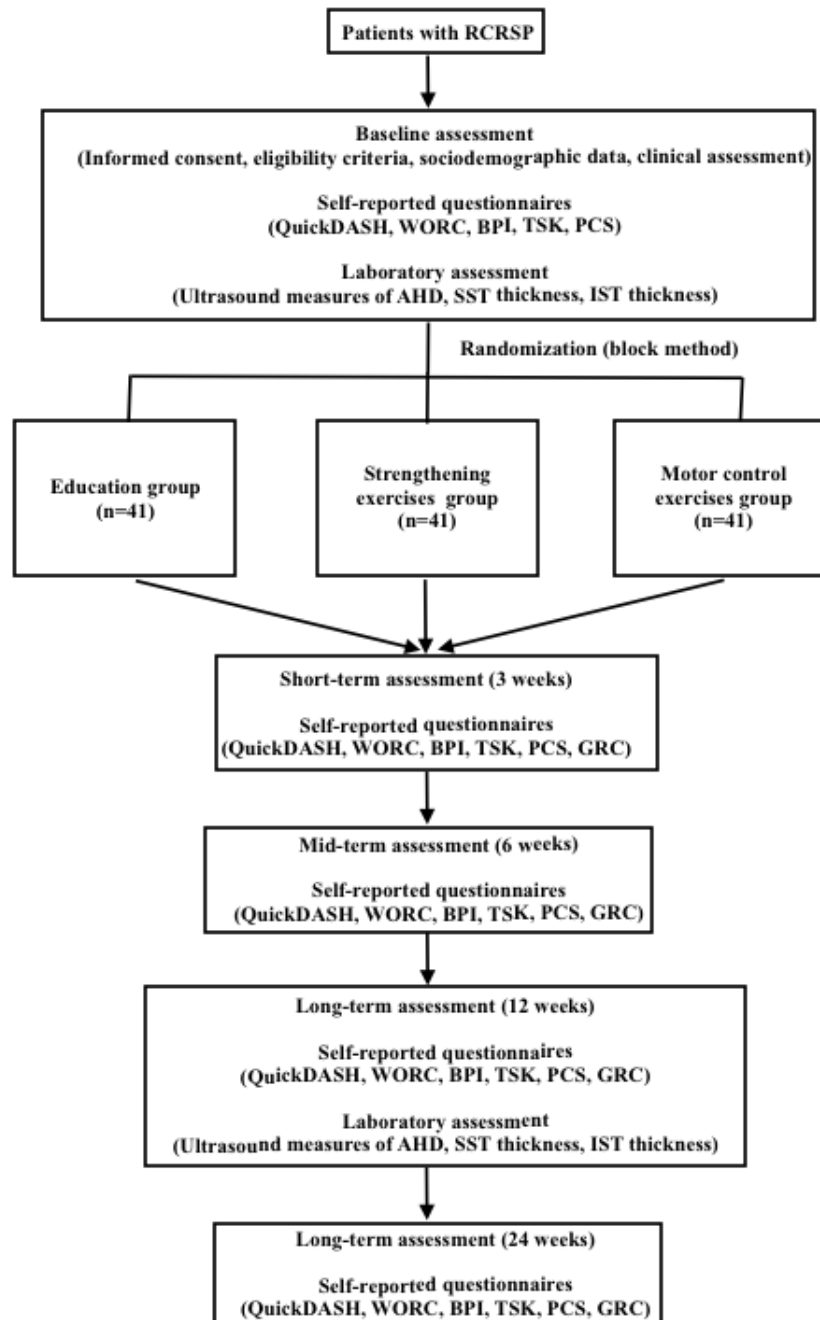

Supplementary file 1: Shoulder muscles strengthening program.

| EXERCISES PROGRAM                                                                                                                                                                                                                                                                                                                                                              |                                                                                     |                                                                                       |
|--------------------------------------------------------------------------------------------------------------------------------------------------------------------------------------------------------------------------------------------------------------------------------------------------------------------------------------------------------------------------------|-------------------------------------------------------------------------------------|---------------------------------------------------------------------------------------|
| A) SHOULDER EXTERNAL ROTATION                                                                                                                                                                                                                                                                                                                                                  |                                                                                     |                                                                                       |
| <p><b>1. Shoulder external rotation at 0°</b></p> <ul style="list-style-type: none"> <li>• Hold a weight in your hand.</li> <li>• Lie on the opposite side of the hand holding the weight.</li> <li>• With the trunk upright, flex the elbow 90 degrees. Tighten the abs.</li> <li>• Lift the weight so that your hand is upward, keeping your elbow at 90 degrees.</li> </ul> |    |    |
| <p><b>2. Shoulder external rotation at 45°</b></p> <ul style="list-style-type: none"> <li>• Hold a weight in your hand.</li> <li>• With the trunk upright, flex the elbow 90 degrees. Tighten the abs.</li> <li>• Lift your arm to 90° of abduction while</li> </ul>                                                                                                           |  |  |

|                                                                                                                                                                                                                                                                                                                                                                                                      |                                                                                      |  |
|------------------------------------------------------------------------------------------------------------------------------------------------------------------------------------------------------------------------------------------------------------------------------------------------------------------------------------------------------------------------------------------------------|--------------------------------------------------------------------------------------|--|
| <p>keeping your elbow flexed at 90°.</p> <ul style="list-style-type: none"> <li>Lift the weight in order to bring your hand upwards and backwards while keeping your elbow flexed at 90° and your arm abducted at 45°.</li> </ul>                                                                                                                                                                    |                                                                                      |  |
| <b>B) SHOULDER INTERNAL ROTATION</b>                                                                                                                                                                                                                                                                                                                                                                 |                                                                                      |  |
| <p><b>1. Shoulder internal rotation at 0°</b></p> <ul style="list-style-type: none"> <li>Tie an elastic band level to your hips. Turn aside.</li> <li>With your trunk straight, flex the elbow 90 degrees. Tighten the abs.</li> <li>Pull the elastic to bring the hand from the outside to the inside, make sure that the elbow does not take off from the body. Keep the elbow at 90 °.</li> </ul> |   |  |
| <b>C) ARM ELEVATION (SCAPTION)</b>                                                                                                                                                                                                                                                                                                                                                                   |                                                                                      |  |
| <p><b>1. Scaption with weight</b></p> <ul style="list-style-type: none"> <li>Use a weight to make the scaption movement.</li> <li>Raise your arm by keeping your elbow extended in a 45° motion plane.</li> <li>Do not lift the shoulder up or lean the trunk to the opposite side.</li> </ul>                                                                                                       |  |  |

## D) SHOULDER PROTRACTION

### 1. Protraction with weight

- Lie on your back with your knees bent and your back in a neutral position. Contract your abs.
- Raise your arm up to reach 90°. When your arm is upright, push your hand toward the ceiling keeping your back flat, without lifting your shoulders.

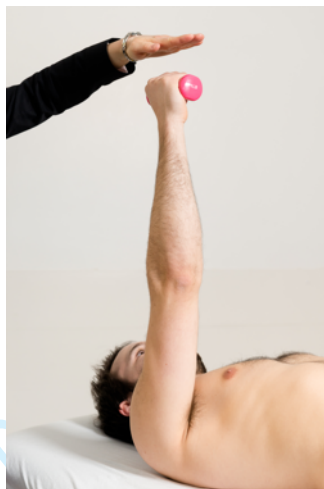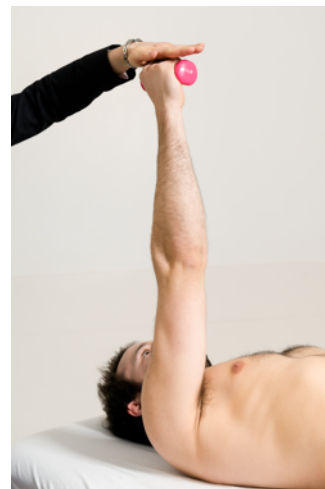

## E) SHOULDER EXTENSION

### 1. Shoulder extension with an elastic band

- With both hands, grasp the ends of a rubber band attached at shoulder height.
- Keep your back straight and your shoulders slightly back. Tighten the abdominals, tuck in the chin.

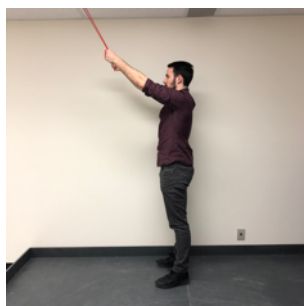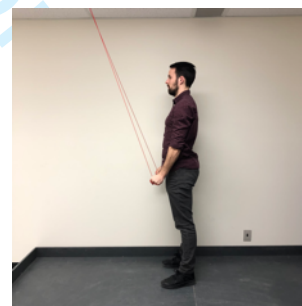



|                                                                                                                                                                                                                                                                                                                                                                                                                                                                                                                                                                                                                                                                                                                                                                                           |                                                                                      |                                                                                       |
|-------------------------------------------------------------------------------------------------------------------------------------------------------------------------------------------------------------------------------------------------------------------------------------------------------------------------------------------------------------------------------------------------------------------------------------------------------------------------------------------------------------------------------------------------------------------------------------------------------------------------------------------------------------------------------------------------------------------------------------------------------------------------------------------|--------------------------------------------------------------------------------------|---------------------------------------------------------------------------------------|
| <p>1</p> <p>2</p> <p>3</p> <p>4</p> <p>5</p> <p>6</p> <p>7</p> <p>8</p> <p>9</p> <p>10</p> <p>11</p> <p>12</p> <p>13</p> <p>14</p> <p>15</p> <p>16</p> <p>17</p> <p>18</p> <p>19</p> <ul style="list-style-type: none"> <li>• With arms outstretched, slowly pull backwards so that your hands are shifted to the outside of your hip. Keep your back straight and your shoulders slightly backwards throughout the exercise.</li> </ul>                                                                                                                                                                                                                                                                                                                                                  |                                                                                      |                                                                                       |
| <p>20</p> <p>21</p> <p><b>F) HORIZONTAL ABDUCTION</b></p>                                                                                                                                                                                                                                                                                                                                                                                                                                                                                                                                                                                                                                                                                                                                 |                                                                                      |                                                                                       |
| <p>22</p> <p>23</p> <p>24</p> <p>25</p> <p>26</p> <p>27</p> <p>28</p> <p>29</p> <p>30</p> <p>31</p> <p>32</p> <p>33</p> <p>34</p> <p>35</p> <p>36</p> <p>37</p> <p>38</p> <p>39</p> <p>40</p> <p>41</p> <p>42</p> <p>43</p> <p>44</p> <p>45</p> <p>46</p> <p>47</p> <p>48</p> <p>49</p> <p>50</p> <p>51</p> <p>52</p> <p>53</p> <p>54</p> <p>55</p> <p>56</p> <p>57</p> <p>58</p> <p>59</p> <p>60</p> <p><b>1. Horizontal abduction with weight</b></p> <ul style="list-style-type: none"> <li>• Lying prone, with your elbow flexed 90° and a weight in each hand.</li> <li>• Lift your arms up 1 or 2 cm without lifting your shoulders from the table.</li> <li>• Extend your elbows.</li> <li>• Flex back your elbows to 90° and lower your arms in the starting position.</li> </ul> |  |  |

## G) ELEVATION

### 1. Elevation with weight

- With arms raised about 30 ° to the side, bring both shoulders slightly back and towards the eyes.
- Tighten the abdominals, tuck in the chin.

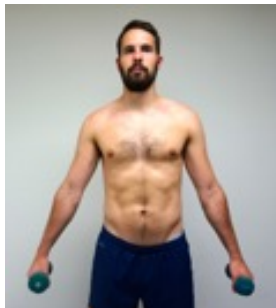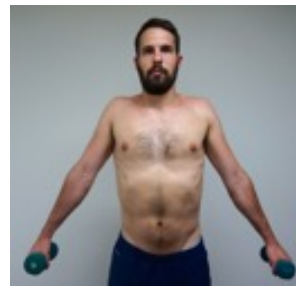

Supplementary file 2: Motor control and functional exercise program.

| <b>EXERCISES PROGRAM</b>                                                                                                                                                                                  |                                                                                     |                                                                                       |
|-----------------------------------------------------------------------------------------------------------------------------------------------------------------------------------------------------------|-------------------------------------------------------------------------------------|---------------------------------------------------------------------------------------|
| <b>A) Exercise 1 : Lower limbs</b>                                                                                                                                                                        |                                                                                     |                                                                                       |
| <p>1.</p> <ul style="list-style-type: none"> <li>• Hold a ball in front of you and bend your knees</li> <li>• Aim for 15 repetitions.</li> </ul>                                                          |    |    |
| <p>2.</p> <ul style="list-style-type: none"> <li>• Perform sit-to-stand for 1 minute.</li> <li>• Stop if you experience significant fatigue or if you reach 1 minute.</li> </ul>                          |   |   |
| <p>3.</p> <ul style="list-style-type: none"> <li>• Continue the same exercise by adding the lifting of one leg and arm from the opposite side as high as possible.</li> <li>• Perform the same</li> </ul> |  |  |

1  
2  
3  
4  
5  
6  
7  
8  
9  
10  
11  
12  
13  
14  
15  
16  
17  
18  
19  
20  
21  
22  
23  
24  
25  
26  
27  
28  
29  
30  
31  
32  
33  
34  
35  
36  
37  
38  
39  
40  
41  
42  
43  
44  
45  
46  
47  
48  
49  
50  
51  
52  
53  
54  
55  
56  
57  
58  
59  
60

|                                                                                                                             |  |  |
|-----------------------------------------------------------------------------------------------------------------------------|--|--|
| <p>movement on the other side and sit down after.</p> <ul style="list-style-type: none"> <li>• Aim for 1 minute.</li> </ul> |  |  |
|-----------------------------------------------------------------------------------------------------------------------------|--|--|

|                                                                                                                                                                                                                                                                                                                                                   |                                                                                    |                                                                                      |
|---------------------------------------------------------------------------------------------------------------------------------------------------------------------------------------------------------------------------------------------------------------------------------------------------------------------------------------------------|------------------------------------------------------------------------------------|--------------------------------------------------------------------------------------|
| <p><b>4.</b></p> <ul style="list-style-type: none"> <li>• Progress to this level when you are able to achieve at least 15 repetitions of level 3 in 1 minute.</li> <li>• Continue sit-to-stand transfers, but this time, tip-toe up when you arrive in a standing position.</li> <li>• Aim for 1 minute and incrementally add weights.</li> </ul> | 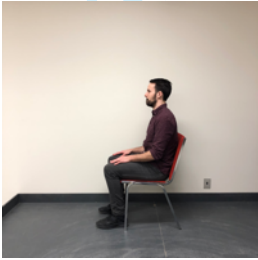 |  |
|---------------------------------------------------------------------------------------------------------------------------------------------------------------------------------------------------------------------------------------------------------------------------------------------------------------------------------------------------|------------------------------------------------------------------------------------|--------------------------------------------------------------------------------------|

**B) Exercise 2 : Upper limbs**

|                                                                                                                  |                                                                                     |                                                                                      |
|------------------------------------------------------------------------------------------------------------------|-------------------------------------------------------------------------------------|--------------------------------------------------------------------------------------|
| <p><b>1.</b></p> <ul style="list-style-type: none"> <li>• Without weight in the hands, bend the trunk</li> </ul> |  |  |
|------------------------------------------------------------------------------------------------------------------|-------------------------------------------------------------------------------------|--------------------------------------------------------------------------------------|

|                                                                                                                                                                                                                                                                                                                                                                                                                                                                                                                                                                         |                                                                                     |                                                                                      |
|-------------------------------------------------------------------------------------------------------------------------------------------------------------------------------------------------------------------------------------------------------------------------------------------------------------------------------------------------------------------------------------------------------------------------------------------------------------------------------------------------------------------------------------------------------------------------|-------------------------------------------------------------------------------------|--------------------------------------------------------------------------------------|
| <p>1<br/>2<br/>3<br/>4<br/>5<br/>6<br/>7<br/>8<br/>9<br/>10<br/>11<br/>12<br/>13<br/>14<br/>15<br/>16<br/>17<br/>18<br/>19<br/>20<br/>21<br/>22</p> <p>slightly to touch the top of a chair and raise your arms at shoulder height.</p> <ul style="list-style-type: none"> <li>• Movement should be slow and until you feel tired or in pain (3/10).</li> </ul>                                                                                                                                                                                                         |                                                                                     |                                                                                      |
| <p>23<br/>24<br/>25<br/>26<br/>27<br/>28<br/>29<br/>30<br/>31<br/>32<br/>33<br/>34<br/>35<br/>36<br/>37<br/>38<br/>39<br/>40<br/>41<br/>42<br/>43<br/>44<br/>45<br/>46<br/>47<br/>48<br/>49<br/>50<br/>51<br/>52<br/>53<br/>54<br/>55<br/>56<br/>57<br/>58<br/>59<br/>60</p> <p>2.</p> <ul style="list-style-type: none"> <li>• Start when you are able to perform at least 15 consecutive level 1 repetitions.</li> <li>• Still without weight in your hands, bend further to touch the chair seat and raise your arms even higher than the previous level.</li> </ul> | 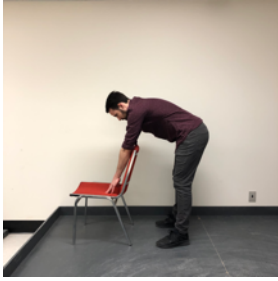 |  |

|                                                                                                                                                                                                                                                                                                                                                          |                                                                                    |                                                                                      |
|----------------------------------------------------------------------------------------------------------------------------------------------------------------------------------------------------------------------------------------------------------------------------------------------------------------------------------------------------------|------------------------------------------------------------------------------------|--------------------------------------------------------------------------------------|
| <ul style="list-style-type: none"><li>• Movement should be slow and until you feel tired or in pain (3/10).</li></ul>                                                                                                                                                                                                                                    |                                                                                    |                                                                                      |
| <p><b>3.</b></p> <ul style="list-style-type: none"><li>• Start when you are able to perform at least 15 consecutive level 2 repetitions.</li><li>• Still without weight in your hands, bend further to touch the ground and raise your arms as high as possible.</li><li>• Movement should be slow and until you feel tired or in pain (3/10).</li></ul> |  |  |

|                                                                                                                                                                                                                                                                                                                                                                                                                                                   |                                                                                   |                                                                                     |
|---------------------------------------------------------------------------------------------------------------------------------------------------------------------------------------------------------------------------------------------------------------------------------------------------------------------------------------------------------------------------------------------------------------------------------------------------|-----------------------------------------------------------------------------------|-------------------------------------------------------------------------------------|
| <p>1<br/>2<br/>3<br/>4<br/>5<br/>6<br/>7<br/>8<br/>9<br/>10<br/>11<br/>12<br/>13<br/>14<br/>15<br/>16<br/>17<br/>18<br/>19<br/>20<br/>21<br/>22<br/>23<br/>24<br/>25<br/>26</p> <p><b>4.</b></p> <ul style="list-style-type: none"><li>• Start when you are able to perform at least 15 consecutive level 3 repetitions.</li><li>• Bend to pick-up a light weight from the ground and raise it as high as possible.</li></ul>                     |  |  |
| <p>27<br/>28<br/>29<br/>30<br/>31<br/>32<br/>33<br/>34<br/>35<br/>36<br/>37<br/>38<br/>39<br/>40<br/>41<br/>42<br/>43<br/>44<br/>45<br/>46<br/>47<br/>48<br/>49<br/>50<br/>51<br/>52<br/>53<br/>54<br/>55<br/>56<br/>57<br/>58<br/>59<br/>60</p> <p><b>5.</b></p> <ul style="list-style-type: none"><li>• Start when you are able to perform at least 15 consecutive level 3 repetitions.</li><li>• Progressively lift heavier weights.</li></ul> | <p>For peer review only</p> <p>Same pictures as level 4</p>                       |                                                                                     |

### C) Exercise 3 : Arm elevation in 3 different planes

#### C1. Flexion

(starting with a short lever if necessary)

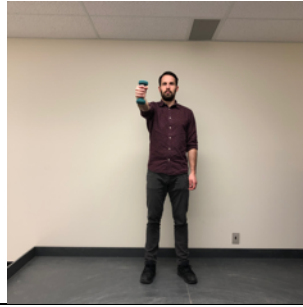

#### C2. Scaption

(starting with a short lever if necessary)

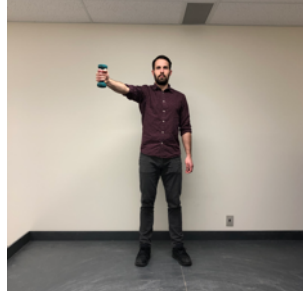

#### C3. Abduction

(starting with a short lever if necessary)

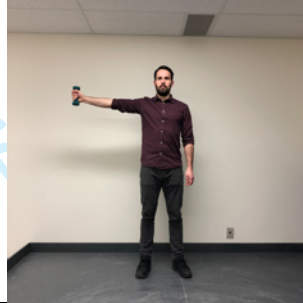

### D) Pushing

#### 1. Wall push up

- Standing, hands resting on the wall, arms a little narrower than the shoulders at an angle of about 45 degrees. Tighten the abdominals, tuck in the chin. Do not lift your shoulders.
- Push against the wall, pushing apart the shoulder blades (round the back),

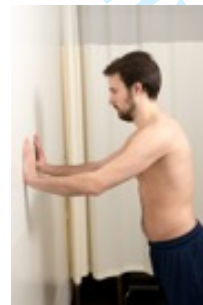



|                                                                                                                                                                                                                                                                                                                                                                                                                                                                                                                                                                                                   |                                                                                                                                                                                                                                                                                                                                                                           |
|---------------------------------------------------------------------------------------------------------------------------------------------------------------------------------------------------------------------------------------------------------------------------------------------------------------------------------------------------------------------------------------------------------------------------------------------------------------------------------------------------------------------------------------------------------------------------------------------------|---------------------------------------------------------------------------------------------------------------------------------------------------------------------------------------------------------------------------------------------------------------------------------------------------------------------------------------------------------------------------|
| <p>1<br/>2<br/>3<br/>4<br/>5<br/>6<br/>7</p> <p>imagining that someone is pushing you on the sternum.</p>                                                                                                                                                                                                                                                                                                                                                                                                                                                                                         |                                                                                                                                                                                                                                                                                                                                                                           |
| <p>8<br/>9<br/>10<br/>11<br/>12<br/>13<br/>14<br/>15<br/>16<br/>17<br/>18<br/>19<br/>20<br/>21<br/>22<br/>23<br/>24<br/>25<br/>26<br/>27</p> <p><b>2. Push up on knees</b></p> <ul style="list-style-type: none"><li>• Place your hands slightly greater than shoulder-width apart and your knees comfortably apart. Tighten the abdominals, tuck in the chin.</li><li>• Slowly bend your elbows and lower your chest until your elbows are flexed 90°, then slowly return to the starting position.</li></ul>                                                                                    |  <p>A photograph of a man in blue shorts performing a push-up on his knees on a blue mat. He is in a starting position with his hands on the floor, slightly wider than shoulder-width apart, and his knees are also on the floor. His back is straight, and his head is tucked in.</p> |
| <p>28<br/>29<br/>30<br/>31<br/>32<br/>33<br/>34<br/>35<br/>36<br/>37<br/>38<br/>39<br/>40<br/>41<br/>42<br/>43<br/>44<br/>45<br/>46<br/>47<br/>48<br/>49<br/>50<br/>51<br/>52<br/>53<br/>54<br/>55<br/>56<br/>57<br/>58<br/>59<br/>60</p> <p><b>3. Push up</b></p> <ul style="list-style-type: none"><li>• Place your hands slightly greater than shoulder-width apart and your feet comfortably apart. Tighten the abdominals, tuck in the chin.</li><li>• Slowly bend your elbows and lower your chest until your elbows are flexed 90°, then slowly return to the starting position.</li></ul> |  <p>A photograph of a man in blue shorts performing a standard push-up on a blue mat. He is in a starting position with his hands on the floor, slightly wider than shoulder-width apart, and his feet are also on the floor. His back is straight, and his head is tucked in.</p>    |

|                                                                                                                                                                                                                                                                                                                                                   |                                                                                      |
|---------------------------------------------------------------------------------------------------------------------------------------------------------------------------------------------------------------------------------------------------------------------------------------------------------------------------------------------------|--------------------------------------------------------------------------------------|
| <b>E) Pulling</b>                                                                                                                                                                                                                                                                                                                                 |                                                                                      |
| <p><b>1. Rowing at shoulder height</b></p> <ul style="list-style-type: none"> <li>• Tie an elastic band in front of you at shoulder height.</li> <li>• Pull the elastic until your elbows are level with your trunk while keeping your hands parallel to the ground. Keep your trunk right, tighten your abdominals and tuck you chin.</li> </ul> |    |
| <p><b>2. Rowing + ER</b></p> <ul style="list-style-type: none"> <li>• Perform level 1.</li> <li>• Once in position, rotate your arm in order to bring your hands backwards.</li> </ul>                                                                                                                                                            |   |
| <p><b>3. Rowing + ER + elbow extension (+squat)</b></p> <ul style="list-style-type: none"> <li>• Perform level 2.</li> <li>• Once in position, extend your elbows and lift your hands as high as possible.</li> </ul>                                                                                                                             |  |
| <b>G) Carrying</b>                                                                                                                                                                                                                                                                                                                                |                                                                                      |
| <p><b>1. Walking while carrying a weight</b></p> <ul style="list-style-type: none"> <li>• Pick up a weight with your hand and walk for 5 meters while keeping your trunk</li> </ul>                                                                                                                                                               |  |

|                                                                                                                                                                                                                                                                                                                                                                           |                                                                                      |                                                                                     |
|---------------------------------------------------------------------------------------------------------------------------------------------------------------------------------------------------------------------------------------------------------------------------------------------------------------------------------------------------------------------------|--------------------------------------------------------------------------------------|-------------------------------------------------------------------------------------|
| <p>right. Walk back with the weight in your other hand.</p>                                                                                                                                                                                                                                                                                                               |                                                                                      |                                                                                     |
| <b>H) Throwing</b>                                                                                                                                                                                                                                                                                                                                                        |                                                                                      |                                                                                     |
| <p><b>1. Simple throwing motion with rubber band</b></p> <ul style="list-style-type: none"> <li>• Tie a rubber band to the top of a door.</li> <li>• Take the rubber band in your hand and turn your back to the door.</li> <li>• Bring your arm forward as if you were throwing an object. Keep your trunk right, tighten your abdominals and tuck your chin.</li> </ul> | 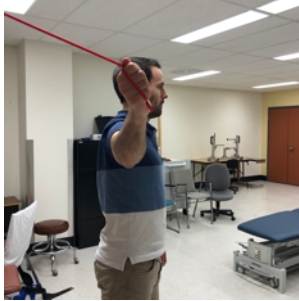   |  |
| <p><b>2. Simple throwing motion with rubber band + shoulder protraction</b></p> <ul style="list-style-type: none"> <li>• Same as level 1 but bring your shoulder forward at the end of the movement.</li> </ul>                                                                                                                                                           |  |                                                                                     |
| <p><b>3. Simple throwing motion with rubber band + trunk rotation</b></p> <ul style="list-style-type: none"> <li>• Same as level 2 but add a trunk rotation to the opposite side of your throwing hand.</li> </ul>                                                                                                                                                        |  |                                                                                     |

## I) Precision

### 1. Drawing the alphabet on the wall with a ball

- Slowly draw the letters of the alphabet on a wall using a rolling ball.
- As you progress, try to draw letters as little as possible.

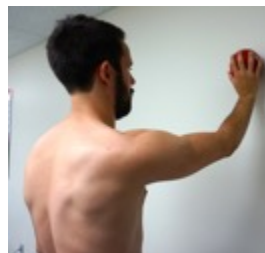

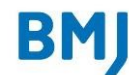

## Consent form

**For a patient's consent to publication of images and/or information about them in BMJ publications.**

Name of patient: \_\_\_\_\_ *Marc-Olivier Dubé* \_\_\_\_\_

Relationship to patient (if patient not signing this form): \_\_\_\_\_

Description of the photo, image, text or other material (**Material**) about the patient. **A copy of the Material must be attached to this form:** \_\_\_\_\_ *Photos for exercise program* \_\_\_\_\_

Provisional title of article in which Material will be included: \_\_\_\_\_ *Rotator cuff related shoulder pain: Does the type of exercise influence the outcomes – Protocol of a randomized controlled trial*

---

### CONSENT

I \_\_\_\_\_ *Marc-Olivier Dubé* \_\_\_\_\_ [PRINT FULL NAME] give my consent for the Material about me/the patient to appear in a BMJ publication.

**I confirm that I:** (please tick boxes to confirm)

**have seen the photo, image, text or other material about me/the patient**

**have read the article to be submitted to BMJ**  **am legally entitled to give this consent.**

I understand the following:

- (1) The Material will be published without my/the patient's name attached, however I understand that complete anonymity cannot be guaranteed. It is possible that somebody somewhere - for example, somebody who looked after me/the patient or a relative - may recognise me/the patient.
- (2) The Material may show or include details of my/the patient's medical condition or injury and any prognosis, treatment or surgery that I have/the patient has, had or may have in the future.

- 1  
2  
3 (3) The article may be published in a journal which is distributed worldwide. BMJ's  
4 publications go mainly to doctors and other healthcare professionals but are  
5 also seen by many others including academics, students and journalists.  
6  
7  
8 (4) The article, including the Material, may be the subject of a press release, and  
9 may be linked to from social media and/or used in other promotional  
10 activities. Once published, the article will be placed on a BMJ website and may  
11 also be available on other websites.  
12  
13 (5) The text of the article will be edited for style, grammar and consistency before  
14 publication.  
15  
16 (6) I/the patient will not receive any financial benefit from publication of the  
17 article.  
18  
19 (7) The article may also be used in full or in part in other publications and products  
20 published by BMJ and/or by other publishers. This includes publication in  
21 English and in translation, in print, in digital formats, and in any other formats  
22 that may be used by BMJ or other publishers now and in the future. The article  
23 may appear in local editions of journals or other publications, published in the  
24 UK and overseas.  
25  
26 (8) I can revoke my consent at any time before publication, but once the article  
27 has been committed to publication ("gone to press") it will not be possible to  
28 revoke the consent.  
29  
30 (9) This consent form will be retained securely and in confidence by BMJ in  
31 accordance with the law, for no longer than necessary. Personal data provided  
32 in this form will be used and retained in accordance with BMJ's Privacy Policy  
33 available at <https://www.bmj.com/company/your-privacy/>.  
34  
35  
36  
37  
38

39 Please tick box to confirm the following:

- 40  
41  Where this consent relates to an article in *BMJ Case Reports*, I have/the patient  
42 has had the opportunity to comment on the article and I am satisfied that the  
43 comments, if any, have been reflected in the article.  
44  
45

46 Signed: Marc-Olivier Dubé

47 Print name: Marc-Olivier Dubé

48  
49 Address: 2507-2818 Boulevard Laurier  
50 marcolivier.dub@gmail.com

51 Email address:

52 G1V0E2 Quebec (Qc), Canada

53 Telephone no: 418-906-2071

54 If signing on behalf of the patient, please give the reason why the patient can't consent for  
55 themselves (e.g. patient is under 18 or has cognitive or intellectual impairment).  
56  
57  
58  
59

Date:

- If you are signing for a family or other group, please tick the box to confirm that all relevant members of the family or group have been informed.

**Details of person who has explained and administered the form** to the patient or their representative (e.g. the corresponding author or other person who has the authority to obtain consent).

Signed: Marc-Olivier Dubé

Print name: Marc-Olivier Dubé

Position: PhD candidate (student)

Address:

Institution: Université Laval

525, boul. Wilfrid-Hamel, Office H-1300

Québec (Québec) G1M 2S8

Email address: marc-olivier.dube.1@ulaval.ca

Telephone no: 418-906-2071

Date: May 1, 2020

Patient consent form 050419

**Supplementary file 3: Information about pain given to both exercise groups**

|   |                                                                                                                                                                                                                                                                                                                                                                       |
|---|-----------------------------------------------------------------------------------------------------------------------------------------------------------------------------------------------------------------------------------------------------------------------------------------------------------------------------------------------------------------------|
| 1 | Feeling pain in the shoulder is permissible and even encouraged during the exercise program. Any level of pain is permissible as long as it is tolerable for the individual, and, that there is no increase or exacerbation in pain in the evening and the following day.                                                                                             |
| 2 | If more guidance as to the amount of pain is required then the participant can perform the exercises in pain with a subjective level of pain between 1 to 3 on a 10-point pain scale, where 0 represents no pain and 10, worst imaginable pain. If this level of pain does not produce an improvement in exercise tolerance, higher levels of pain may be encouraged. |
| 3 | Participants will be informed that if increased pain is experienced in the evening or the following day and if this pain is not acceptable for the individual then the number of repetitions per set, number of sets, amount of weight should be reduced accordingly.                                                                                                 |
| 4 | If there is no exacerbation of pain and the participant perceives that the amount of weight and number of repetitions are being performed at a moderate intensity (on a scale ranging from: no exertion/ easy, mild, moderate, hard, impossible), then heavier weights, or more repetitions may be incrementally used.                                                |



## Formulaire de consentement

Page 1 sur 1

Numéro de projet : 2019-1762

**Titre du projet :** Douleur à l'épaule reliée à la coiffe des rotateurs : Est-ce que le type d'exercices influence les résultats? – Un essai clinique randomisé

**Chercheur responsable du projet :** Jean-Sébastien Roy, pht, Ph.D.

- 1) Le (la) responsable m'a informé(e) de la nature et des buts de ce projet de recherche ainsi que de son déroulement;
- 2) Le (la) responsable m'a informé(e) des risques et inconvénients associés à ma participation;
- 3) Ma participation à cette étude est volontaire et je peux me retirer en tout temps sans préjudice;
- 4) Les données de cette étude seront traitées en toute confidentialité et elles ne seront utilisées qu'aux fins scientifiques et par les partenaires identifiés au formulaire d'information;
- 5) J'ai pu poser toutes les questions voulues concernant ce projet et j'ai obtenu des réponses satisfaisantes;
- 6) Ma décision de participer à cette étude ne libère ni les chercheurs, ni l'établissement hôte de leurs obligations envers moi;
- 7) Je sais qu'aucune rémunération n'est rattachée à ma participation;
- 8) Le (la) responsable m'a remis un exemplaire du feuillet d'information et du formulaire de consentement;
- 9) J'ai lu le présent formulaire et je consens volontairement à participer à cette étude;
- 10) Je désire recevoir une copie des résultats de l'étude  oui  non

\* Pour les **personnes majeures inaptes**, remplacer la signature du participant par celle du mandataire.

\_\_\_\_\_  
Nom du participant

\_\_\_\_\_  
Date de naissance

\_\_\_\_\_  
Numéro de téléphone

\_\_\_\_\_  
Signature du participant \*

\_\_\_\_\_  
Date

\_\_\_\_\_  
Nom du chercheur

\_\_\_\_\_  
Date

\_\_\_\_\_  
Signature

# Reporting checklist for protocol of a clinical trial.

Based on the SPIRIT guidelines.

## Instructions to authors

Complete this checklist by entering the page numbers from your manuscript where readers will find each of the items listed below.

Your article may not currently address all the items on the checklist. Please modify your text to include the missing information. If you are certain that an item does not apply, please write "n/a" and provide a short explanation.

Upload your completed checklist as an extra file when you submit to a journal.

In your methods section, say that you used the SPIRIT reporting guidelines, and cite them as:

Chan A-W, Tetzlaff JM, Altman DG, Laupacis A, Gøtzsche PC, Krleža-Jerić K, Hróbjartsson A, Mann H, Dickersin K, Berlin J, Doré C, Parulekar W, Summerskill W, Groves T, Schulz K, Sox H, Rockhold FW, Rennie D, Moher D. SPIRIT 2013 Statement: Defining standard protocol items for clinical trials. *Ann Intern Med.* 2013;158(3):200-207

|                                             |                     | Reporting Item                                                                                               | Page Number |
|---------------------------------------------|---------------------|--------------------------------------------------------------------------------------------------------------|-------------|
| <b>Administrative information</b>           |                     |                                                                                                              |             |
| Title                                       | <a href="#">#1</a>  | Descriptive title identifying the study design, population, interventions, and, if applicable, trial acronym | 1           |
| Trial registration                          | <a href="#">#2a</a> | Trial identifier and registry name. If not yet registered, name of intended registry                         | 2           |
| Trial registration: data set                | <a href="#">#2b</a> | All items from the World Health Organization Trial Registration Data Set                                     | n/a no data |
| Protocol version                            | <a href="#">#3</a>  | Date and version identifier                                                                                  | 1           |
| Funding                                     | <a href="#">#4</a>  | Sources and types of financial, material, and other support                                                  | 13          |
| Roles and responsibilities: contributorship | <a href="#">#5a</a> | Names, affiliations, and roles of protocol contributors                                                      | 1 and 13    |

|    |                           |                     |                                                                   |          |
|----|---------------------------|---------------------|-------------------------------------------------------------------|----------|
| 1  | Roles and                 | <a href="#">#5b</a> | Name and contact information for the trial sponsor                | n/a no   |
| 2  | responsibilities:         |                     |                                                                   | trial    |
| 3  | sponsor contact           |                     |                                                                   | sponsor  |
| 4  | information               |                     |                                                                   |          |
| 5  |                           |                     |                                                                   |          |
| 6  |                           |                     |                                                                   |          |
| 7  |                           |                     |                                                                   |          |
| 8  | Roles and                 | <a href="#">#5c</a> | Role of study sponsor and funders, if any, in study design;       | n/a none |
| 9  | responsibilities:         |                     | collection, management, analysis, and interpretation of data;     |          |
| 10 | sponsor and funder        |                     | writing of the report; and the decision to submit the report for  |          |
| 11 |                           |                     | publication, including whether they will have ultimate authority  |          |
| 12 |                           |                     | over any of these activities                                      |          |
| 13 |                           |                     |                                                                   |          |
| 14 |                           |                     |                                                                   |          |
| 15 |                           |                     |                                                                   |          |
| 16 | Roles and                 | <a href="#">#5d</a> | Composition, roles, and responsibilities of the coordinating      | n/a none |
| 17 | responsibilities:         |                     | centre, steering committee, endpoint adjudication committee,      |          |
| 18 | committees                |                     | data management team, and other individuals or groups             |          |
| 19 |                           |                     | overseeing the trial, if applicable (see Item 21a for data        |          |
| 20 |                           |                     | monitoring committee)                                             |          |
| 21 |                           |                     |                                                                   |          |
| 22 |                           |                     |                                                                   |          |
| 23 |                           |                     |                                                                   |          |
| 24 | <b>Introduction</b>       |                     |                                                                   |          |
| 25 |                           |                     |                                                                   |          |
| 26 |                           |                     |                                                                   |          |
| 27 | Background and            | <a href="#">#6a</a> | Description of research question and justification for            | 3        |
| 28 | rationale                 |                     | undertaking the trial, including summary of relevant studies      |          |
| 29 |                           |                     | (published and unpublished) examining benefits and harms for      |          |
| 30 |                           |                     | each intervention                                                 |          |
| 31 |                           |                     |                                                                   |          |
| 32 |                           |                     |                                                                   |          |
| 33 |                           |                     |                                                                   |          |
| 34 | Background and            | <a href="#">#6b</a> | Explanation for choice of comparators                             | 3        |
| 35 | rationale: choice of      |                     |                                                                   |          |
| 36 | comparators               |                     |                                                                   |          |
| 37 |                           |                     |                                                                   |          |
| 38 |                           |                     |                                                                   |          |
| 39 | Objectives                | <a href="#">#7</a>  | Specific objectives or hypotheses                                 | 3 and 4  |
| 40 |                           |                     |                                                                   |          |
| 41 | Trial design              | <a href="#">#8</a>  | Description of trial design including type of trial (eg, parallel | 4        |
| 42 |                           |                     | group, crossover, factorial, single group), allocation ratio, and |          |
| 43 |                           |                     | framework (eg, superiority, equivalence, non-inferiority,         |          |
| 44 |                           |                     | exploratory)                                                      |          |
| 45 |                           |                     |                                                                   |          |
| 46 |                           |                     |                                                                   |          |
| 47 |                           |                     |                                                                   |          |
| 48 | <b>Methods:</b>           |                     |                                                                   |          |
| 49 | <b>Participants,</b>      |                     |                                                                   |          |
| 50 | <b>interventions, and</b> |                     |                                                                   |          |
| 51 | <b>outcomes</b>           |                     |                                                                   |          |
| 52 |                           |                     |                                                                   |          |
| 53 |                           |                     |                                                                   |          |
| 54 |                           |                     |                                                                   |          |
| 55 | Study setting             | <a href="#">#9</a>  | Description of study settings (eg, community clinic, academic     | 4        |
| 56 |                           |                     | hospital) and list of countries where data will be collected.     |          |
| 57 |                           |                     | Reference to where list of study sites can be obtained            |          |
| 58 |                           |                     |                                                                   |          |
| 59 |                           |                     |                                                                   |          |
| 60 |                           |                     |                                                                   |          |

|    |                              |                      |                                                                                                                                                                                                                                                                                                                                                                                |                 |
|----|------------------------------|----------------------|--------------------------------------------------------------------------------------------------------------------------------------------------------------------------------------------------------------------------------------------------------------------------------------------------------------------------------------------------------------------------------|-----------------|
| 1  | Eligibility criteria         | <a href="#">#10</a>  | Inclusion and exclusion criteria for participants. If applicable, eligibility criteria for study centres and individuals who will perform the interventions (eg, surgeons, psychotherapists)                                                                                                                                                                                   | 4               |
| 2  |                              |                      |                                                                                                                                                                                                                                                                                                                                                                                |                 |
| 3  |                              |                      |                                                                                                                                                                                                                                                                                                                                                                                |                 |
| 4  |                              |                      |                                                                                                                                                                                                                                                                                                                                                                                |                 |
| 5  |                              |                      |                                                                                                                                                                                                                                                                                                                                                                                |                 |
| 6  | Interventions:               | <a href="#">#11a</a> | Interventions for each group with sufficient detail to allow replication, including how and when they will be administered                                                                                                                                                                                                                                                     | 5 and 6         |
| 7  | description                  |                      |                                                                                                                                                                                                                                                                                                                                                                                |                 |
| 8  |                              |                      |                                                                                                                                                                                                                                                                                                                                                                                |                 |
| 9  |                              |                      |                                                                                                                                                                                                                                                                                                                                                                                |                 |
| 10 | Interventions:               | <a href="#">#11b</a> | Criteria for discontinuing or modifying allocated interventions for a given trial participant (eg, drug dose change in response to harms, participant request, or improving / worsening disease)                                                                                                                                                                               | 5 and 6         |
| 11 | modifications                |                      |                                                                                                                                                                                                                                                                                                                                                                                |                 |
| 12 |                              |                      |                                                                                                                                                                                                                                                                                                                                                                                |                 |
| 13 |                              |                      |                                                                                                                                                                                                                                                                                                                                                                                |                 |
| 14 |                              |                      |                                                                                                                                                                                                                                                                                                                                                                                |                 |
| 15 | Interventions:               | <a href="#">#11c</a> | Strategies to improve adherence to intervention protocols, and any procedures for monitoring adherence (eg, drug tablet return; laboratory tests)                                                                                                                                                                                                                              | 5 and 6         |
| 16 | adherence                    |                      |                                                                                                                                                                                                                                                                                                                                                                                |                 |
| 17 |                              |                      |                                                                                                                                                                                                                                                                                                                                                                                |                 |
| 18 |                              |                      |                                                                                                                                                                                                                                                                                                                                                                                |                 |
| 19 |                              |                      |                                                                                                                                                                                                                                                                                                                                                                                |                 |
| 20 |                              |                      |                                                                                                                                                                                                                                                                                                                                                                                |                 |
| 21 | Interventions:               | <a href="#">#11d</a> | Relevant concomitant care and interventions that are permitted or prohibited during the trial                                                                                                                                                                                                                                                                                  | n/a             |
| 22 | concomitant care             |                      |                                                                                                                                                                                                                                                                                                                                                                                |                 |
| 23 |                              |                      |                                                                                                                                                                                                                                                                                                                                                                                |                 |
| 24 |                              |                      |                                                                                                                                                                                                                                                                                                                                                                                |                 |
| 25 | Outcomes                     | <a href="#">#12</a>  | Primary, secondary, and other outcomes, including the specific measurement variable (eg, systolic blood pressure), analysis metric (eg, change from baseline, final value, time to event), method of aggregation (eg, median, proportion), and time point for each outcome. Explanation of the clinical relevance of chosen efficacy and harm outcomes is strongly recommended | 6 and 7         |
| 26 |                              |                      |                                                                                                                                                                                                                                                                                                                                                                                |                 |
| 27 |                              |                      |                                                                                                                                                                                                                                                                                                                                                                                |                 |
| 28 |                              |                      |                                                                                                                                                                                                                                                                                                                                                                                |                 |
| 29 |                              |                      |                                                                                                                                                                                                                                                                                                                                                                                |                 |
| 30 |                              |                      |                                                                                                                                                                                                                                                                                                                                                                                |                 |
| 31 |                              |                      |                                                                                                                                                                                                                                                                                                                                                                                |                 |
| 32 |                              |                      |                                                                                                                                                                                                                                                                                                                                                                                |                 |
| 33 |                              |                      |                                                                                                                                                                                                                                                                                                                                                                                |                 |
| 34 | Participant timeline         | <a href="#">#13</a>  | Time schedule of enrolment, interventions (including any run-ins and washouts), assessments, and visits for participants. A schematic diagram is highly recommended (see Figure)                                                                                                                                                                                               | 4 + figure<br>1 |
| 35 |                              |                      |                                                                                                                                                                                                                                                                                                                                                                                |                 |
| 36 |                              |                      |                                                                                                                                                                                                                                                                                                                                                                                |                 |
| 37 |                              |                      |                                                                                                                                                                                                                                                                                                                                                                                |                 |
| 38 |                              |                      |                                                                                                                                                                                                                                                                                                                                                                                |                 |
| 39 |                              |                      |                                                                                                                                                                                                                                                                                                                                                                                |                 |
| 40 | Sample size                  | <a href="#">#14</a>  | Estimated number of participants needed to achieve study objectives and how it was determined, including clinical and statistical assumptions supporting any sample size calculations                                                                                                                                                                                          | 4 and 5         |
| 41 |                              |                      |                                                                                                                                                                                                                                                                                                                                                                                |                 |
| 42 |                              |                      |                                                                                                                                                                                                                                                                                                                                                                                |                 |
| 43 |                              |                      |                                                                                                                                                                                                                                                                                                                                                                                |                 |
| 44 |                              |                      |                                                                                                                                                                                                                                                                                                                                                                                |                 |
| 45 | Recruitment                  | <a href="#">#15</a>  | Strategies for achieving adequate participant enrolment to reach target sample size                                                                                                                                                                                                                                                                                            | 4 and 5         |
| 46 |                              |                      |                                                                                                                                                                                                                                                                                                                                                                                |                 |
| 47 |                              |                      |                                                                                                                                                                                                                                                                                                                                                                                |                 |
| 48 |                              |                      |                                                                                                                                                                                                                                                                                                                                                                                |                 |
| 49 | <b>Methods: Assignment</b>   |                      |                                                                                                                                                                                                                                                                                                                                                                                |                 |
| 50 | <b>of interventions (for</b> |                      |                                                                                                                                                                                                                                                                                                                                                                                |                 |
| 51 | <b>controlled trials)</b>    |                      |                                                                                                                                                                                                                                                                                                                                                                                |                 |
| 52 |                              |                      |                                                                                                                                                                                                                                                                                                                                                                                |                 |
| 53 |                              |                      |                                                                                                                                                                                                                                                                                                                                                                                |                 |
| 54 | Allocation: sequence         | <a href="#">#16a</a> | Method of generating the allocation sequence (eg, computer-generated random numbers), and list of any factors for stratification. To reduce predictability of a random sequence, details of any planned restriction (eg, blocking) should be                                                                                                                                   | 5               |
| 55 | generation                   |                      |                                                                                                                                                                                                                                                                                                                                                                                |                 |
| 56 |                              |                      |                                                                                                                                                                                                                                                                                                                                                                                |                 |
| 57 |                              |                      |                                                                                                                                                                                                                                                                                                                                                                                |                 |
| 58 |                              |                      |                                                                                                                                                                                                                                                                                                                                                                                |                 |
| 59 |                              |                      |                                                                                                                                                                                                                                                                                                                                                                                |                 |
| 60 |                              |                      |                                                                                                                                                                                                                                                                                                                                                                                |                 |

provided in a separate document that is unavailable to those who enrol participants or assign interventions

|    |                        |                      |                                                                     |
|----|------------------------|----------------------|---------------------------------------------------------------------|
| 1  |                        |                      |                                                                     |
| 2  |                        |                      |                                                                     |
| 3  |                        |                      |                                                                     |
| 4  | Allocation             | <a href="#">#16b</a> | Mechanism of implementing the allocation sequence (eg, central      |
| 5  | concealment            |                      | telephone; sequentially numbered, opaque, sealed envelopes),        |
| 6  |                        |                      | describing any steps to conceal the sequence until interventions    |
| 7  | mechanism              |                      | are assigned                                                        |
| 8  |                        |                      |                                                                     |
| 9  |                        |                      |                                                                     |
| 10 |                        |                      |                                                                     |
| 11 | Allocation:            | <a href="#">#16c</a> | Who will generate the allocation sequence, who will enrol           |
| 12 | implementation         |                      | participants, and who will assign participants to interventions     |
| 13 |                        |                      |                                                                     |
| 14 |                        |                      |                                                                     |
| 15 | Blinding (masking)     | <a href="#">#17a</a> | Who will be blinded after assignment to interventions (eg, trial    |
| 16 |                        |                      | participants, care providers, outcome assessors, data analysts),    |
| 17 |                        |                      | and how                                                             |
| 18 |                        |                      |                                                                     |
| 19 |                        |                      |                                                                     |
| 20 | Blinding (masking):    | <a href="#">#17b</a> | If blinded, circumstances under which unblinding is permissible,    |
| 21 | emergency unblinding   |                      | and procedure for revealing a participant's allocated intervention  |
| 22 |                        |                      | during the trial                                                    |
| 23 |                        |                      |                                                                     |
| 24 |                        |                      |                                                                     |
| 25 | <b>Methods: Data</b>   |                      |                                                                     |
| 26 | <b>collection,</b>     |                      |                                                                     |
| 27 | <b>management, and</b> |                      |                                                                     |
| 28 | <b>analysis</b>        |                      |                                                                     |
| 29 |                        |                      |                                                                     |
| 30 |                        |                      |                                                                     |
| 31 |                        |                      |                                                                     |
| 32 | Data collection plan   | <a href="#">#18a</a> | Plans for assessment and collection of outcome, baseline, and       |
| 33 |                        |                      | other trial data, including any related processes to promote data   |
| 34 |                        |                      | quality (eg, duplicate measurements, training of assessors) and a   |
| 35 |                        |                      | description of study instruments (eg, questionnaires, laboratory    |
| 36 |                        |                      | tests) along with their reliability and validity, if known.         |
| 37 |                        |                      | Reference to where data collection forms can be found, if not in    |
| 38 |                        |                      | the protocol                                                        |
| 39 |                        |                      |                                                                     |
| 40 |                        |                      |                                                                     |
| 41 |                        |                      |                                                                     |
| 42 |                        |                      |                                                                     |
| 43 | Data collection plan:  | <a href="#">#18b</a> | Plans to promote participant retention and complete follow-up,      |
| 44 | retention              |                      | including list of any outcome data to be collected for participants |
| 45 |                        |                      | who discontinue or deviate from intervention protocols              |
| 46 |                        |                      |                                                                     |
| 47 |                        |                      |                                                                     |
| 48 |                        |                      |                                                                     |
| 49 | Data management        | <a href="#">#19</a>  | Plans for data entry, coding, security, and storage, including any  |
| 50 |                        |                      | related processes to promote data quality (eg, double data entry;   |
| 51 |                        |                      | range checks for data values). Reference to where details of data   |
| 52 |                        |                      | management procedures can be found, if not in the protocol          |
| 53 |                        |                      |                                                                     |
| 54 |                        |                      |                                                                     |
| 55 | Statistics: outcomes   | <a href="#">#20a</a> | Statistical methods for analysing primary and secondary             |
| 56 |                        |                      | outcomes. Reference to where other details of the statistical       |
| 57 |                        |                      | analysis plan can be found, if not in the protocol                  |
| 58 |                        |                      |                                                                     |
| 59 |                        |                      |                                                                     |
| 60 |                        |                      |                                                                     |

|    |                            |                      |                                                                    |     |
|----|----------------------------|----------------------|--------------------------------------------------------------------|-----|
| 1  | Statistics: additional     | <a href="#">#20b</a> | Methods for any additional analyses (eg, subgroup and adjusted     | 7   |
| 2  | analyses                   |                      | analyses)                                                          |     |
| 3  |                            |                      |                                                                    |     |
| 4  | Statistics: analysis       | <a href="#">#20c</a> | Definition of analysis population relating to protocol non-        | 7   |
| 5  | population and missing     |                      | adherence (eg, as randomised analysis), and any statistical        |     |
| 6  | data                       |                      | methods to handle missing data (eg, multiple imputation)           |     |
| 7  |                            |                      |                                                                    |     |
| 8  |                            |                      |                                                                    |     |
| 9  |                            |                      |                                                                    |     |
| 10 | <b>Methods: Monitoring</b> |                      |                                                                    |     |
| 11 |                            |                      |                                                                    |     |
| 12 | Data monitoring:           | <a href="#">#21a</a> | Composition of data monitoring committee (DMC); summary of         | 7   |
| 13 | formal committee           |                      | its role and reporting structure; statement of whether it is       |     |
| 14 |                            |                      | independent from the sponsor and competing interests; and          |     |
| 15 |                            |                      | reference to where further details about its charter can be found, |     |
| 16 |                            |                      | if not in the protocol. Alternatively, an explanation of why a     |     |
| 17 |                            |                      | DMC is not needed                                                  |     |
| 18 |                            |                      |                                                                    |     |
| 19 |                            |                      |                                                                    |     |
| 20 |                            |                      |                                                                    |     |
| 21 |                            |                      |                                                                    |     |
| 22 | Data monitoring:           | <a href="#">#21b</a> | Description of any interim analyses and stopping guidelines,       | 7   |
| 23 | interim analysis           |                      | including who will have access to these interim results and make   |     |
| 24 |                            |                      | the final decision to terminate the trial                          |     |
| 25 |                            |                      |                                                                    |     |
| 26 |                            |                      |                                                                    |     |
| 27 | Harms                      | <a href="#">#22</a>  | Plans for collecting, assessing, reporting, and managing solicited | 7   |
| 28 |                            |                      | and spontaneously reported adverse events and other unintended     |     |
| 29 |                            |                      | effects of trial interventions or trial conduct                    |     |
| 30 |                            |                      |                                                                    |     |
| 31 |                            |                      |                                                                    |     |
| 32 |                            |                      |                                                                    |     |
| 33 | Auditing                   | <a href="#">#23</a>  | Frequency and procedures for auditing trial conduct, if any, and   | n/a |
| 34 |                            |                      | whether the process will be independent from investigators and     |     |
| 35 |                            |                      | the sponsor                                                        |     |
| 36 |                            |                      |                                                                    |     |
| 37 |                            |                      |                                                                    |     |
| 38 | <b>Ethics and</b>          |                      |                                                                    |     |
| 39 | <b>dissemination</b>       |                      |                                                                    |     |
| 40 |                            |                      |                                                                    |     |
| 41 |                            |                      |                                                                    |     |
| 42 | Research ethics            | <a href="#">#24</a>  | Plans for seeking research ethics committee / institutional review | 8   |
| 43 | approval                   |                      | board (REC / IRB) approval                                         |     |
| 44 |                            |                      |                                                                    |     |
| 45 |                            |                      |                                                                    |     |
| 46 | Protocol amendments        | <a href="#">#25</a>  | Plans for communicating important protocol modifications (eg,      | 8   |
| 47 |                            |                      | changes to eligibility criteria, outcomes, analyses) to relevant   |     |
| 48 |                            |                      | parties (eg, investigators, REC / IRBs, trial participants, trial  |     |
| 49 |                            |                      | registries, journals, regulators)                                  |     |
| 50 |                            |                      |                                                                    |     |
| 51 |                            |                      |                                                                    |     |
| 52 |                            |                      |                                                                    |     |
| 53 | Consent or assent          | <a href="#">#26a</a> | Who will obtain informed consent or assent from potential trial    | 8   |
| 54 |                            |                      | participants or authorised surrogates, and how (see Item 32)       |     |
| 55 |                            |                      |                                                                    |     |
| 56 |                            |                      |                                                                    |     |
| 57 |                            |                      |                                                                    |     |
| 58 |                            |                      |                                                                    |     |
| 59 |                            |                      |                                                                    |     |
| 60 |                            |                      |                                                                    |     |

|    |                          |                      |                                                                      |           |
|----|--------------------------|----------------------|----------------------------------------------------------------------|-----------|
| 1  | Consent or assent:       | <a href="#">#26b</a> | Additional consent provisions for collection and use of              | n/a       |
| 2  | ancillary studies        |                      | participant data and biological specimens in ancillary studies, if   |           |
| 3  |                          |                      | applicable                                                           |           |
| 4  |                          |                      |                                                                      |           |
| 5  |                          |                      |                                                                      |           |
| 6  | Confidentiality          | <a href="#">#27</a>  | How personal information about potential and enrolled                | 8         |
| 7  |                          |                      | participants will be collected, shared, and maintained in order to   |           |
| 8  |                          |                      | protect confidentiality before, during, and after the trial          |           |
| 9  |                          |                      |                                                                      |           |
| 10 |                          |                      |                                                                      |           |
| 11 | Declaration of interests | <a href="#">#28</a>  | Financial and other competing interests for principal                | 13        |
| 12 |                          |                      | investigators for the overall trial and each study site              |           |
| 13 |                          |                      |                                                                      |           |
| 14 |                          |                      |                                                                      |           |
| 15 | Data access              | <a href="#">#29</a>  | Statement of who will have access to the final trial dataset, and    | n/a       |
| 16 |                          |                      | disclosure of contractual agreements that limit such access for      |           |
| 17 |                          |                      | investigators                                                        |           |
| 18 |                          |                      |                                                                      |           |
| 19 |                          |                      |                                                                      |           |
| 20 | Ancillary and post trial | <a href="#">#30</a>  | Provisions, if any, for ancillary and post-trial care, and for       | n/a       |
| 21 | care                     |                      | compensation to those who suffer harm from trial participation       |           |
| 22 |                          |                      |                                                                      |           |
| 23 |                          |                      |                                                                      |           |
| 24 | Dissemination policy:    | <a href="#">#31a</a> | Plans for investigators and sponsor to communicate trial results     | 8         |
| 25 | trial results            |                      | to participants, healthcare professionals, the public, and other     |           |
| 26 |                          |                      | relevant groups (eg, via publication, reporting in results           |           |
| 27 |                          |                      | databases, or other data sharing arrangements), including any        |           |
| 28 |                          |                      | publication restrictions                                             |           |
| 29 |                          |                      |                                                                      |           |
| 30 |                          |                      |                                                                      |           |
| 31 |                          |                      |                                                                      |           |
| 32 |                          |                      |                                                                      |           |
| 33 | Dissemination policy:    | <a href="#">#31b</a> | Authorship eligibility guidelines and any intended use of            | n/a       |
| 34 | authorship               |                      | professional writers                                                 |           |
| 35 |                          |                      |                                                                      |           |
| 36 |                          |                      |                                                                      |           |
| 37 | Dissemination policy:    | <a href="#">#31c</a> | Plans, if any, for granting public access to the full protocol,      | n/a       |
| 38 | reproducible research    |                      | participant-level dataset, and statistical code                      |           |
| 39 |                          |                      |                                                                      |           |
| 40 |                          |                      |                                                                      |           |
| 41 | <b>Appendices</b>        |                      |                                                                      |           |
| 42 |                          |                      |                                                                      |           |
| 43 | Informed consent         | <a href="#">#32</a>  | Model consent form and other related documentation given to          | Supp file |
| 44 | materials                |                      | participants and authorised surrogates                               |           |
| 45 |                          |                      |                                                                      |           |
| 46 |                          |                      |                                                                      |           |
| 47 | Biological specimens     | <a href="#">#33</a>  | Plans for collection, laboratory evaluation, and storage of          | n/a       |
| 48 |                          |                      | biological specimens for genetic or molecular analysis in the        |           |
| 49 |                          |                      | current trial and for future use in ancillary studies, if applicable |           |
| 50 |                          |                      |                                                                      |           |
| 51 |                          |                      |                                                                      |           |

## Notes:

- 2b: n/a no data
- 5b: n/a no trial sponsor

- 1  
2  
3  
4  
5  
6  
7  
8  
9  
10  
11  
12  
13  
14  
15  
16  
17  
18  
19  
20  
21  
22  
23  
24  
25  
26  
27  
28  
29  
30  
31  
32  
33  
34  
35  
36  
37  
38  
39  
40  
41  
42  
43  
44  
45  
46  
47  
48  
49  
50  
51  
52  
53  
54  
55  
56  
57  
58  
59  
60
- 13: 4 + figure 1 The SPIRIT checklist is distributed under the terms of the Creative Commons Attribution License CC-BY-ND 3.0. This checklist was completed on 30. April 2020 using <https://www.goodreports.org/>, a tool made by the [EQUATOR Network](#) in collaboration with [Penelope.ai](#)

For peer review only
