# Supplementary material for: Rotator cuff-related shoulder pain: does the type of exercise influence the outcomes? Protocol of a randomised controlled trial
Source: PubMed Central journal article supplement — BMJ Open. 2020 Nov 5;10(11):e039976. doi: 10.1136/bmjopen-2020-039976 (PMC7646354; doi:10.1136/bmjopen-2020-039976), 2020-11-05
Supplement: bmjopen-2020-039976supp004.pdf [file bmjopen-2020-039976supp004.pdf]

Centre intégré  
universitaire de santé  
et de services sociaux  
de la Capitale-Nationale

Québec

## Formulaire de consentement

Page 1 sur 1

Numéro de projet : 2019-1762

**Titre du projet :** Douleur à l'épaule reliée à la coiffe des rotateurs : Est-ce que le type d'exercices influence les résultats? – Un essai clinique randomisé

**Chercheur responsable du projet :** Jean-Sébastien Roy, pht, Ph.D.

- 1) Le (la) responsable m'a informé(e) de la nature et des buts de ce projet de recherche ainsi que de son déroulement;
- 2) Le (la) responsable m'a informé(e) des risques et inconvénients associés à ma participation;
- 3) Ma participation à cette étude est volontaire et je peux me retirer en tout temps sans préjudice;
- 4) Les données de cette étude seront traitées en toute confidentialité et elles ne seront utilisées qu'aux fins scientifiques et par les partenaires identifiés au formulaire d'information;
- 5) J'ai pu poser toutes les questions voulues concernant ce projet et j'ai obtenu des réponses satisfaisantes;
- 6) Ma décision de participer à cette étude ne libère ni les chercheurs, ni l'établissement hôte de leurs obligations envers moi;
- 7) Je sais qu'aucune rémunération n'est rattachée à ma participation;
- 8) Le (la) responsable m'a remis un exemplaire du feuillet d'information et du formulaire de consentement;
- 9) J'ai lu le présent formulaire et je consens volontairement à participer à cette étude;
- 10) Je désire recevoir une copie des résultats de l'étude ☐ oui ☐ non

\* Pour les **personnes majeures inaptes**, remplacer la signature du participant par celle du mandataire.

|                            |                   |                     |
|----------------------------|-------------------|---------------------|
| Nom du participant         | Date de naissance | Numéro de téléphone |
| Signature du participant * | Date              |                     |
| Nom du chercheur           | Date              | Signature           |

Réservé à  
l'administration  
2018-06

Approuvé par le CÉR-S en  
réadaptation et intégration sociale

N° version : 1 Date : 2019-03-28
